## **Comparison of decision-related signals in sensory and motor preparatory responses of neurons in Area LIP**

**S. Shushruth<sup>1\*</sup>, Mark Mazurek<sup>\*§</sup> and Michael N. Shadlen<sup>1</sup>**

<sup>1</sup>Zuckerman Mind Brain Behavior Institute, Kavli Institute, Howard Hughes Medical Institute, Dept. of Neuroscience, Columbia University, New York, United States.

\* Equal contribution

§ Deceased

Number of pages: 29

Number of figures: 8 (+4 Supplementary Figures)

Competing Interests: None to declare

## 1 **ABSTRACT**

2  
3       Neurons in the lateral intraparietal area (LIP) exhibit both sensory and  
4 oculomotor preparatory responses. During perceptual decision making, the  
5 preparatory responses have been shown to track the state of the evolving evidence  
6 leading to the decision. The sensory responses are known to reflect categorical  
7 properties of visual stimuli, but it is not known if these responses also track  
8 evolving evidence. We compared sensory and oculomotor-preparatory responses in  
9 the same neurons during a direction discrimination task when either the  
10 discriminandum (random dot motion) or an eye movement choice-target was in the  
11 neuron's response field. Both configurations elicited task related activity, but only  
12 the motor preparatory responses reflected evidence accumulation. The results are  
13 consistent with the proposal that evolving decision processes are supported by  
14 persistent neural activity in the service of actions or intentions, as opposed to high  
15 order representations of stimulus properties.

## 16 INTRODUCTION

17

18 The life of animals is a constant process of deciding what to do next based on,  
19 among other things, the perception of the world around them. In primates,  
20 perceptual decision making has evolved into an efficient mechanism of translating  
21 the perceived state of the world into possible motor actions (Cisek and Kalaska,  
22 2005; Klaes et al., 2011; Kubanek and Snyder, 2015). The motor system receives  
23 continuous access to evolving perceptual decisions and maintains a graded level of  
24 preparedness based on the quality of the incoming evidence (Gold and Shadlen,  
25 2000; Selen et al., 2012). This sensorimotor transformation is particularly evident in  
26 the parietal and prefrontal association cortices, where neurons encoding the motor  
27 actions associated with the choices on offer also represent evolving decisions (Kim  
28 and Shadlen, 1999; Roitman and Shadlen, 2002; Bollimunta and Ditterich, 2011;  
29 Ding and Gold, 2012; de Lafuente et al., 2015). Thus, perceptual decision making can  
30 be framed as a choice between available motor actions (Cisek, 2007; Shadlen et al.,  
31 2008; Cisek and Kalaska, 2010).

32 Yet, perceptual decisions do not feel like they are about potential actions but  
33 about propositions or stimulus properties. Indeed, one can make a decision without  
34 knowledge of the action that will be required to act on it. In such situations, one  
35 might expect neural circuits involved in motor planning to be irrelevant to the  
36 decision process (Gold and Shadlen, 2003). However, it has been shown that even  
37 then, neurons in the parietal association areas carry a representation of the  
38 properties of the stimulus that will be relevant for future actions (Freedman and  
39 Assad, 2006; Bennur and Gold, 2011; Goodwin et al., 2012). It is possible that such  
40 an ‘abstract’ representations of decision relevant information— independent of the  
41 possible motor actions—coexist with representations of decisions as intended  
42 actions (Freedman and Assad, 2011). Whether such simultaneous representations  
43 exist in the same association area has not been investigated before. Consequently, it  
44 is also not known if such abstract representations play a role in the decision-making  
45 process.

46 We used the random-dot motion (RDM) direction discrimination task  
47 (Newsome et al., 1989) to investigate these questions. In this task, the animals  
48 discern the net direction of a stochastic motion stimulus and report their decision  
49 by making a saccade to one of two choice targets that is along the direction of the  
50 perceived motion. This task is particularly well suited for our purposes. First,  
51 optimal performance on this task demands integration of motion evidence over  
52 time. This prolonged deliberation time allows characterization of whether a neural  
53 population is participating in the process of evidence accumulation or not. Second,  
54 there exists a theoretical framework—bounded accumulation of noisy evidence to a  
55 decision threshold (aka drift-diffusion, Smith and Ratcliff, 2004; Palmer et al.,  
56 2005)— that accounts quantitatively for the speed and accuracy of decisions in this  
57 task. Third, it has been shown that responses of neurons in several areas of the  
58 brain involved in planning saccadic eye movements represent the evolving decision  
59 in this task (Shadlen and Newsome, 1996; Horwitz and Newsome, 1999; Kim and  
60 Shadlen, 1999; Ding and Gold, 2010, 2012).

61 We focused on the parietal sensorimotor association area LIP. Many neurons  
62 in LIP respond to both the presence of a sensory stimulus in, and to a planned  
63 saccade into their response fields (Barash et al., 1991b). We recorded the responses  
64 of the same set of neurons during the RDM discrimination task in two configurations  
65 — when the RFs contained the RDM stimulus and when they contained one of the  
66 choice targets. We show that the neurons represent the moment-by-moment  
67 accumulation of sensory evidence only in the latter configuration, that is, when they  
68 are involved in the planning of the motor action required to report the choice.

69  
70

## 71 RESULTS

72

73 We recorded from 49 well isolated single neurons in area LIP from two  
74 monkeys (28 neurons from monkey N and 21 neurons from monkey B) as they  
75 decided the net direction of a noisy random-dot motion (RDM) stimulus. On each  
76 trial, two choice targets indicated the two directions to be discriminated (e.g., up vs.  
77 down). The monkeys reported their decision by making a saccade to the choice  
78 target along the perceived direction of motion. They were free to indicate their  
79 decision whenever ready, thus providing a measure of reaction time (RT). The  
80 monkeys performed the task with the RDM and the targets arranged in two  
81 configurations (Figure 1). In the ‘*Target-in-RF*’ configuration, one of the choice  
82 targets was placed in the response field (RF) of the neuron under study. In the ‘*RDM-*  
83 *in-RF*’ configuration, the RDM was placed in the RF. In this way, we obtained data  
84 from the same LIP neuron when it belonged either to the pool representing the RDM  
85 stimulus or to one of the two pools representing the choice targets.

86 We first establish that the animals integrate motion information over 100s of  
87 ms to make their choices in both task configurations. This prolonged deliberation  
88 time offers a window in which to interrogate how the neural responses relate to the  
89 process of decision formation. We show that the firing rates of neurons represent  
90 the state of the accumulated evidence only when the neurons belong to a pool  
91 representing the targets.

92

### 93 Behavior in the two task configurations

94 The behavior of both monkeys exhibited an orderly dependence on the  
95 strength of the RDM in both task configurations. They took longer to report their  
96 decision when the motion strength was weaker (Figure 2, A-D), and their decisions  
97 were less accurate (Figure 2, E-H). The systematic relationship between reaction  
98 time (RT) and accuracy is well described by the accumulation of noisy evidence to a  
99 threshold, which determines both the time it takes to make a decision and which  
100 alternative the monkey chooses (Gold and Shadlen, 2002; Smith and Ratcliff, 2004).  
101 We support this assertion by fitting the RTs to a bounded evidence accumulation  
102 model and then using the fitted parameters to predict the choices (Shadlen and  
103 Kiani, 2013; Kang et al., 2017). Specifically, the curves in the top row of Figure 2 are  
104 fits to a parsimonious symmetrically bounded drift diffusion model, which uses four  
105 parameters to account for the effect of motion strength on the mean RT for correct

106 choices (Equation 1; see Methods). Two of the parameters—the bound height,  $\pm B$ ,  
107 and the sensitivity coefficient,  $\kappa$ , that multiplies motion strength to establish the  
108 drift rate—establish predictions for the proportion of choices as a function of  
109 motion strength. The dashed curves in the lower panels of [Figure 2](#) depict these  
110 predictions. They are in excellent agreement with the data (e.g., the deviance of the  
111 predictions exceeds the deviance of a logistic fit to the data by  $25.1 \pm 7.1$ ; range 10 to  
112 41.1). It is not the case that any monotonic ordering of RTs by motion strength  
113 would do as well. For example, random perturbations of the mean RTs which  
114 preserve their orderly dependence on motion strength yielded significantly worse  
115 choice predictions ([Supp. Fig. S1](#)). The predictions in all configurations were more  
116 similar to the accuracy function obtained by logistic regression (red lines in [Supp.](#)  
117 [Fig. S1](#)) than the predictions after perturbation ( $p < 10^{-10}$  in all four configurations).  
118 The fidelity of the predictions offers strong support for the assertion that the  
119 choices result from the same process of bounded evidence accumulation that  
120 explains the decision times. Importantly, this conclusion holds for both stimulus  
121 configurations.

122 From this exercise we conclude that the decision times (i.e., RT minus the  
123 non-decision time) estimated from diffusion model fits can be used to identify an  
124 epoch in which noisy evidence was integrated to make the decision. To obtain more  
125 refined estimates of the integration times for the different task configurations, we fit  
126 a more elaborate bounded diffusion model ([Supp. Fig. S2](#), see Methods for details  
127 and [Table 1](#) for fit parameters). The small differences in reaction times between the  
128 two configurations for Monkey N was accounted for by the non-decision time  
129 parameter. For Monkey B, a combination of increased sensitivity and decreased  
130 bound height contributed to the faster RTs in the RDM-in-RF configuration.  
131 Importantly, the fits established that both monkeys integrated evidence over  
132 hundreds of ms in each configuration (mean  $\pm$  SD of decision times at 0% motion  
133 coherence:  $0.41 \pm 0.2$  s in both configurations for Monkey N,  $0.24 \pm 0.1$  s and  $0.20 \pm 0.1$   
134 s for Monkey B in the Target-in-RF and RDM-in-RF configurations respectively).  
135 Furthermore, the decision times did not differ significantly between the task  
136 configurations in either monkey at any of the coherences ( $p > 0.3$  at all stimulus  
137 strengths, t-test).

138

### 139 **LIP neuronal responses in the two task configurations**

140 Neurons in area LIP can exhibit sensory-, memory- and saccade-related  
141 responses (Gnadt and Andersen, 1988; Barash et al., 1991a). For example, in a task  
142 where a monkey has to remember a visually cued location and make a delayed  
143 saccade to it, LIP neurons can show (1) a short latency response to the visual cue if it  
144 appears in the RF, (2) a persistently elevated response during the delay period and  
145 (3) a burst of activity preceding a saccade to the remembered location. Not all  
146 neurons exhibit all three types of responses. Since our goal was to compare the  
147 decision related activity in the same neurons when they belonged to the pool  
148 representing the sensory information and when they belonged to the pool involved  
149 in planning the motor action, we recorded from neurons that responded to visual  
150 stimuli in their RF and also showed persistent activity in association with saccadic  
151 motor planning.

152 During the direction discrimination epoch, the pattern of activity of the  
153 recorded neurons varied according to which pool they belonged to. When the  
154 neurons belonged to a pool with one of the targets in the RF, the responses largely  
155 recapitulated observations from earlier reports (e.g. Roitman and Shadlen, 2002;  
156 Churchland et al., 2008). [Figure 3](#) shows the average population response of all  
157 neurons in the Target-in-RF configuration, aligned to either the onset of RDM  
158 ([Figure 3A](#)) or to the saccade ([Figure 3B](#)). The response is elevated before the onset  
159 of the RDM reflecting the presence of a choice target in the RF of the neurons.  
160 Following motion onset, there is a stereotyped dip in activity before the responses  
161 begin to separate by motion strength. The evolution, beginning ~180 ms after  
162 stimulus onset, is best appreciated in the de-trended responses ([Figure 3A, inset](#)).  
163 These features and those next described were evident in both of the monkeys,  
164 shown individually in [Supp. Fig. S3](#) and [Supp. Fig. S4](#).

165 The same neurons also exhibited differential responses to the two directions  
166 of motion being discriminated when they belonged to the pool representing the  
167 RDM. To combine responses across the population in this task configuration, we  
168 identified the preferred direction of motion for each neuron as the one that elicited  
169 the greater response at the highest motion strength (51.2% coherence). [Figure 3C-D](#)  
170 shows the responses of the population averaged after sorting by each neuron's  
171 preferred direction. After an initial rise in activity due to the appearance of the RDM  
172 in the RF, the responses exhibited a coherence dependent separation starting ~180  
173 ms after stimulus onset. The coherence dependent rise is evident in the de-trended  
174 responses ([Figure 3C, inset](#)) albeit with a smaller dynamic range compared to  
175 responses in the Target-in-RF configuration. Note that in this configuration,  
176 directions are sorted based on a post-hoc criterion — preferred direction of each  
177 neuron at the highest motion strength. The coherence dependent ordering of  
178 responses could have been accentuated by this selection bias.

179 The responses of LIP neurons in the RDM-in-RF configuration bear similarity  
180 to direction selectivity reported in naïve monkeys (Fanini and Assad, 2009) and  
181 category selectivity reported in monkeys trained to categorize sets of motion  
182 directions (Freedman and Assad, 2006). For comparison with these studies, we  
183 quantified the time course of the evolution of direction selectivity at the highest  
184 motion strength ([Figure 3E](#)) using an ROC metric (see Methods). The responses to  
185 the two motion directions were significantly different starting 190 ms after the  
186 onset of dot stimulus ( $p < 0.05$  on Wilcoxon rank sum test). This is much later than  
187 the ~50 ms latency of direction selectivity observed in naïve monkeys (Fanini and  
188 Assad, 2009) and ~100 ms latency for direction category selectivity (Swaminathan  
189 and Freedman, 2012). As discussed below, this may be an indication that the  
190 directional responses we observed in the RDM-in-RF configuration arise through a  
191 different mechanism than the direction- and category-selective responses  
192 previously reported in LIP.

193 The latency in the RDM-in-RF configuration lagged the direction selectivity  
194 seen in the same neurons in the Target-in-RF configuration (180 ms,  $p < 10^{-3}$ ,  
195 bootstrap analysis). However, the similarity of the latencies suggests that the RDM-  
196 in-RF population might also reflect the formation of the decision, as the Target-in-RF  
197 population has been shown to do (Roitman and Shadlen, 2002; Churchland et al.,



198 2008). To test this, we asked if the rise or decline of neural activity depended on  
199 both the direction and strength of the RDM. We quantified this by estimating the  
200 slope of the responses (buildup rate) in a 200 ms epoch beginning at the time of  
201 response separation, identified in the preceding analysis. We characterized the  
202 relationship between motion strength and buildup rates separately for the  
203 preferred and non-preferred directions of motion (Figure 3F). The buildup rates of  
204 neurons in the Target-in-RF configuration showed a linear dependence on motion  
205 strength both when the motion direction was towards the RF ( $1.5 \pm 0.2$  spikes per  $s^2$   
206 per 1% coherence,  $p < 10^{-9}$ ) and when the motion was away from the RF ( $-1.2 \pm 0.2$ ,  
207  $p < 10^{-5}$ ). A similar trend was observed in the RDM-in-RF configuration. However,  
208 this relationship was significant only for the non-preferred direction of motion ( $-$   
209  $0.7 \pm 0.2$  spikes per  $s^2$  per 1% coherence,  $p < 0.002$ ). For the preferred direction, the  
210 build-up rates increased with coherence but not significantly so ( $0.6 \pm 0.4$  spikes per  
211  $s^2$  per 1% coherence,  $p = 0.13$ ). In both configurations, these trends were preserved  
212 even when the highest motion strength trials were excluded. Thus, neuronal pools  
213 in LIP representing the saccade targets and the RDM both differentiate the  
214 discriminanda during an epoch coinciding with decision formation. The build-up of  
215 neural activity depended on the strength of the stimulus in both populations, but  
216 this dependence was weaker when the RDM was in the RF.

217 We also compared the responses at the end of the decision process for the  
218 two task configurations (Figure 3B & D). When the monkey chose the target in the  
219 neuron's RF, the responses appear to coalesce to a common firing rate just before  
220 the saccade, irrespective of motion strength (Figure 3B, solid curves), as shown  
221 previously (Roitman and Shadlen, 2002; Churchland et al., 2008). This pattern is  
222 thought to reflect a threshold level detected by another circuit to terminate the  
223 decision (Hanes and Schall, 1996; Mazurek et al., 2003; Hanks et al., 2014). When  
224 the same neurons contained the RDM in their RF, the responses to the different  
225 coherences remained separated until the saccade, irrespective of whether the  
226 animal chose the target consistent with the preferred direction or not (Figure 3D).  
227 This was also the case when the RF contained the unchosen target (Figure 3B,  
228 dashed curves). Thus, only the responses of the pool representing the target chosen  
229 by the animal contains a possible neural signature of decision termination. In the  
230 ensuing sections, we support this qualitative observation with other lines of  
231 evidence that show that this pool alone signals decision termination and the time  
232 taken to reach it.

233

### 234 **Correlation between neural responses and behavior**

235 We examined whether the neural responses in the two stimulus  
236 configurations were predictive of the monkey's decisions. Specifically, we asked if  
237 the trial to trial variation in the responses correlates with the trial to trial variation  
238 in the monkey's choice behavior. To test this for each neuron, we counted the spikes  
239 in a 200 ms long epoch ending 100 ms before saccade initiation on each trial and  
240 incorporated this count in a logistic regression model of choice (GLM; see Methods).  
241 To facilitate comparison across the two stimulus configurations, we standardized  
242 the responses across trials of each configuration. We included the strength and  
243 direction of the presented stimulus as confounders, thus asking whether the

244 variation in neural response tells us more about the upcoming choice than can be  
245 ascertained from the stimulus itself. This was indeed the case for 61.2% of cells in  
246 the Target-in-RF configuration and for 35.4% of cells in the RDM-in-RF  
247 configuration (30 of 49 and 17 of 48 cells respectively; Eq. 4,  $H_0: \beta_2 = 0$ ;  $p < 0.05$ ;  
248 [Figure 4A](#)). The leverage of the neural activity on choice was significantly stronger  
249 in the Target-in-RF configuration ( $p = 0.005$ , signed rank test).

250 In a complementary analysis, we assessed whether the neural responses on  
251 ambiguous trials (0% motion coherence) differed according to the eventual choice  
252 of the animal. We computed choice probability (Britten et al., 1996), a  
253 nonparametric statistic that quantifies the overlap between the distributions of  
254 responses of the neuron accompanying the two choices (see Methods). A choice  
255 probability of 0.5 indicates that the two distributions are completely overlapping  
256 and therefore uninformative about the ensuing choice. At the single neuron level,  
257 choice probability of 32.4% and 25.8% of the neurons was significantly different  
258 from 0.5 in the Target-in-RF and RDM-in-RF configurations, respectively (12 of 37  
259 and 8 of 31 cells with at least 10 trials at 0% coherence respectively,  $p < 0.05$  on  
260 permutation test). In both stimulus configurations, the mean choice probability of  
261 the neuronal population was significantly greater than 0.5 ([Figure 4B](#), population  
262 mean  $\pm$  SEM of  $0.66 \pm 0.03$  and  $0.59 \pm 0.04$  for Target-in-RF and RDM-in-RF  
263 respectively,  $p < 10^{-5}$  and  $p < 0.02$  on t-test). For comparison between the two  
264 configurations, we calculated 'grand' choice probability from standardized  
265 responses of all neurons on the 0% coherence trials (see Methods, Britten et al.,  
266 1996). This choice probability was significantly stronger in the Target-in-RF  
267 configuration (0.65 vs. 0.56,  $p < 10^{-3}$ , permutation test). From the analyses of choice  
268 probability and firing rate leverage on choice ([Figure 4A-B](#)) we adduce that LIP  
269 neurons responsive to both the RDM and the choice targets are informative about  
270 the choice, but it is the latter set of neurons (Target-in-RF) that covary more  
271 strongly with choice.

272 Finally, since the neurons exhibit time dependent changes in their activity in  
273 both stimulus configurations, we asked whether the variation of the buildup rates  
274 were predictive of the variation in the RTs on a trial-by-trial basis. We used the  
275 trials in which the monkey chose the target in the RF or the target consistent with  
276 the direction of motion preferred by the neuron (RDM-in-RF). For a majority of  
277 neurons recorded in the Target-in-RF configuration (36 of 49), the reaction times  
278 were inversely correlated with the slope of the neural responses (population mean:  
279  $-0.08$ ,  $p < 0.01$ ). In the RDM-in-RF configuration, the correlation was not significantly  
280 different from 0 (mean: 0.03,  $p > 0.33$ ) ([Figure 4C](#)) and significantly weaker than the  
281 correlations seen in the Target-in-RF configuration ( $p < 0.01$ , Kolmogorov-Smirnov  
282 test). This comparison suggests that only the pool of neurons that contain the  
283 chosen target in their RF carries information about the time the animal will take to  
284 report its decision.

### 285 **Signatures of noisy evidence accumulation in the response variance**

286 We also wished to ascertain whether the responses on single trials conform  
287 to the expectations of noisy evidence accumulation. If they do so, the variance of the  
288 firing rates across trials should increase linearly as a function of time (i.e., the  
289



290 number of samples accumulated). Also, the autocorrelation between firing rates at  
291 different times within a trial should conform to the pattern associated with the  
292 cumulative sum of random numbers. This correlation should decay as a function of  
293 separation in time from the first sample and increase for equidistant samples as a  
294 function of time from the onset of accumulation (see Methods). We used the method  
295 developed by de Lafuente et al. (2015) (based on Churchland et al. (2011)) to  
296 estimate these quantities.

297 The variance and autocorrelation patterns varied markedly based on  
298 whether the neurons contained the target or the RDM in their RF. In the Target-in-  
299 RF configuration, the variance increased linearly with time during the same epoch  
300 that the mean firing rates seemed to reflect the integration of evidence (Figure 5A,  
301 shaded region). In the RDM-in-RF configuration, the rise in variance was  
302 significantly weaker ( $p < 10^{-10}$ , bootstrap analysis). Also, the observed  
303 autocorrelation matrix for the responses in the Target-in-RF configuration (Figure  
304 6B-D) resembled the theoretical prediction ( $R^2 = 0.88$ ). In contrast, the pattern of  
305 autocorrelations (Figure 6E-G) for the responses in the RDM-in-RF configuration  
306 diverged markedly from the predicted pattern ( $R^2 = 0.2$ ). A bootstrap analysis  
307 confirmed that the difference in  $R^2$  values between the two configurations was  
308 statistically reliable ( $p < 10^{-10}$ ; see Methods).

309 The variance of the neural response also affords a more refined examination  
310 of the mechanism of decision termination. The firing rate averages in Figure 3B  
311 suggest the possibility that decisions terminate when the firing rate of the neurons  
312 with the chosen target in their RF reach a threshold. A more stringent test of a  
313 threshold is that even for the same motion strength, the variance of the neural  
314 response should approach a minimum just before the saccade. Indeed, we observed  
315 a precipitous decline in the variance in the  $\sim 100$  ms preceding the saccade (Figure  
316 5B, solid blue line). The variance in the time bin preceding the saccade was  
317 significantly lower than the variance in its prior time bin ( $p < 0.01$ , bootstrap  
318 analysis). This feature is less prominent for the pool of neurons with the unchosen  
319 target (Figure 5B, dashed blue line,  $p = 0.07$ ) and for the neurons with the RDM  
320 (Figure 5B, green lines,  $p > 0.1$  for both direction choices) in their RF.

321 Together, the analyses of time dependent variance and autocorrelation  
322 reveal that neurons in the Target-in-RF configuration exhibit firing rate patterns  
323 consistent with a process that represents the running sum of noisy samples of  
324 evidence to a criterion level. The analyses complement the observations made  
325 earlier on the mean firing rates by demonstrating conformance with the second  
326 order statistics of diffusion to a bound. These features were largely absent when the  
327 same neurons were studied in the RDM-in-RF configuration. This neural population  
328 does not appear to represent the accumulation of the noisy evidence that supports  
329 the monkey's decisions. They reflect the direction of motion during the time course  
330 of decision formation but not the state of the accumulated evidence that can be used  
331 to terminate the decision process. We next consider a possible account of their  
332 pattern of activity.

### 334 **A model of interaction between populations**

335 How could the responses of neurons with the RDM in their RF correlate with

336 the decision outcome without representing the process of evidence accumulation?  
337 One possibility is that the weaker decision-related signals observed in the  
338 population with the RDM in their RF are inherited from the populations that have  
339 the choice targets in their RF and are involved in the accumulation process. It has  
340 been shown that responses of LIP neurons to visual stimuli are suppressed by  
341 concurrently presented visual stimuli when they are well outside the RF (Balan et  
342 al., 2008; Churchland et al., 2008), even by as much as 50° visual angle (Falkner et  
343 al., 2010; Louie et al., 2011). An asymmetrical influence of the two Target-in-RF  
344 populations could lead to the appearance of direction selectivity and a correlation  
345 with the animal's choices in the RDM-in-RF population. Moreover, the noise added  
346 through this additional step could explain the divergence of the variance and  
347 autocorrelation of the RDM-in-RF population from the theoretical predictions of a  
348 diffusion process. Additionally, such an extra step could account for the timing of  
349 direction selectivity in the RDM-in-RF population, which lags slightly behind that of  
350 the Target-in-RF population.

351 To evaluate the plausibility of this idea, we simulated the responses of three  
352 neural populations—one representing the motion stimulus and two representing  
353 the choice targets—during the motion viewing epoch (Figure 7A). In the model, the  
354 RDM-in-RF population receives direct excitation from the visual representation of  
355 the dynamic random dots, but in a manner that is not selective for direction. This  
356 response is thus similar to the classic sensory response to the appearance of a visual  
357 stimulus in the RF. The two Target-in-RF populations start off at a steady firing rate,  
358 simulating the steady state sensory response to the target already present in the RF.  
359 The responses then follow drift-diffusion dynamics starting at 180 ms, simulating  
360 evidence accumulation. The drift rate was set to be directly or inversely  
361 proportional to motion coherence for the populations representing the correct and  
362 incorrect targets, respectively (Figure 7B-C).

363 The three populations interact through divisive suppression (Sceniak et al.,  
364 2001; Carandini and Heeger, 2011; Louie et al., 2011) at each time point,  
365 parameterized by the  $\omega$  terms in Equation 8 (Methods). We set these parameters to  
366 approximate the observed neural responses to the 25.6% motion strength RDM  
367 (illustrated in Figure 7F-G). We assumed that the early dip in the response of the  
368 Target-in-RF neurons (arrow, Figure 7F) was caused by suppression from the  
369 neurons activated by the appearance of the RDM ( $\omega_{DT1}=\omega_{DT2}$ ). The suppression  
370 between the two Target-in-RF pools ( $\omega_{T1T2}=\omega_{T2T1}$ ) was estimated from the onset  
371 and steady state responses after the appearance of the target in the RF. Suppression  
372 of the RDM-in-RF pool from the Target-in-RF pools ( $\omega_{T1D}$  and  $\omega_{T2D}$ ) were adjusted  
373 around  $\omega_{DT}$  to achieve the separation in firing rate traces shown in Figure 7F-G (see  
374 Methods). Such asymmetric influence of the two Target-in-RF populations might  
375 arise from differences in their spatial relationship (neuronal connectivity) with the  
376 RDM-in-RF population. These adjustments were sufficient to mimic the observed  
377 mean responses of the neural population in our simulations (Figure 7D-E). Note that  
378 the direction selectivity of the RDM-in-RF population is derived solely from the  
379 suppressive inputs from the Target-in-RF populations.

380 This simple model reproduced the main features of our results. After the  
381 implementation of suppression, the Target-in-RF population retained the time

382 course of the variance and the pattern of autocorrelation expected of a diffusion  
383 process. Notably, the RDM-in-RF population displayed features that resemble those  
384 seen in the neural data, namely (i) the attenuated increase in variance as a function  
385 of time and (ii) the divergence in the pattern of autocorrelation from theoretical  
386 prediction (Figure 8). Thus, the model provides a plausible account of how mean  
387 neural responses in the RDM-in-RF population can reflect the animal's choices while  
388 the variance and autocorrelation of these responses fail to show signatures of  
389 evidence accumulation.

390  
391

## 392 DISCUSSION

393

394 We analyzed the decision related activity of LIP neurons under two  
395 configurations that allowed us to compare and contrast the sensory and motor-  
396 planning responses. To do this we studied the same LIP neurons when either the  
397 RDM stimulus or one of the choice targets was in the neural response field. Based on  
398 this comparison, we conclude that the process of evidence accumulation leading to  
399 choice is revealed primarily in motor preparatory responses. The sensory responses  
400 exhibit direction preference and a weak relationship with the animal's behavior, but  
401 our results and simulations suggest that this relationship is likely inherited from the  
402 motor preparatory responses. We first discuss our results in the context of previous  
403 studies of area LIP and then on how they bear on the broader question of routing of  
404 information in the cortex.

405

### 406 **Properties of neural responses in area LIP**

407

408 There has been a long debate about the relative importance of sensory  
409 salience-related signals and saccade preparatory signals in area LIP (Bushnell et al.,  
410 1981; Barash et al., 1991a; Colby and Goldberg, 1999; Andersen and Buneo, 2002). A  
411 large fraction of neurons show inherent selectivity for visual features such as  
412 direction and shape even in monkeys that have never been trained to use such  
413 information to perform a laboratory task (Serenio and Maunsell, 1998; Fanini and  
414 Assad, 2009). In addition, training induces stimulus selectivity that can be distinct  
415 from intrinsic selectivity (Toth and Assad, 2002; Sarma et al., 2015). LIP neurons  
416 also carry a rich representation of saccade plans. They display spatially selective  
417 persistent activity when the animal awaits making a saccade to a previously  
418 instructed, but no longer visible target (Gnadt and Andersen, 1988; Barash et al.,  
419 1991a). This persistent activity is dissociable from the sensory response evoked by  
420 the target (Mazzoni et al., 1996) and can encode other factors that bear on the  
421 saccade plan such as the probability that a saccade will be instructed (Janssen and  
422 Shadlen, 2005) and the expected reward (Platt and Glimcher, 1999; Sugrue et al.,  
423 2004). The richness of the representation of the saccade plans is particularly  
424 evident in perceptual decision-making tasks, where the neuronal activity  
425 continually tracks the current state of the evidence for choosing the target in the  
426 neuron's RF (Mazurek et al., 2003; Bollimunta et al., 2012). This activity reflects not  
just the state of the accumulated evidence, but also other factors that can influence

427 decisions such as cost of time (Churchland et al., 2008; Hanks et al., 2014), prior  
428 knowledge (Hanks et al., 2011; Rao et al., 2012), and the values of the choices on  
429 offer (Rorie et al., 2010).

430 By recording from the same LIP neurons when they belonged to the  
431 population representing either the RDM or a choice targets, we could directly  
432 compare the sensory- and saccade-related responses. While both populations  
433 exhibit decision-related activity, there are many important differences. Both  
434 populations modulated their activity during decision formation in accordance with  
435 the strength and direction of the RDM. However, this modulation was far more  
436 intense when a choice target was in the RF. The RDM elicited a strong response  
437 when it was in the RF, but the dependence on direction and stimulus strength was  
438 subtle. This is unlikely to be explained by saturation of the response (e.g., ceiling  
439 effects), because the same neurons attained higher firing rates before saccade onset  
440 when the target was in the RF (cf. [Figure 3B](#) and [Figure 3C](#)). There was also a clear  
441 difference in the variance and autocorrelation patterns for the two populations.  
442 Only when the neurons contained a choice target in their RF were these patterns  
443 consistent with the predictions of noisy evidence accumulation. Finally, a neural  
444 correlate of decision termination was only apparent when a target was in the RF.

445 Although we have used the term “sensory” to describe the direction selective  
446 responses of neurons with the RDM in their RF, the gradual build-up of the firing  
447 rates of these neurons ([Figure 3B](#)) differed from the steady rates reported in naïve  
448 monkeys (Fanini and Assad, 2009). We suspect that the responses are not sensory  
449 in the way one would characterize the responses of neurons in visual areas MT/MST  
450 or even the visual responses of LIP neurons to transient stimuli (e.g., targets). The  
451 direction selective responses observed in the RDM-in-RF configuration were  
452 remarkably slow, emerging 190 ms after stimulus onset (at the highest coherence).  
453 This is far later than the ~50 ms latency of direction selectivity reported by Fanini  
454 and Assad (2009) and the ~100ms latency for direction-category selectivity  
455 reported in Swaminathan and Freedman (2012). It is slightly longer than the 180 ms  
456 latency of decision-related signals observed in the neuronal pool representing the  
457 targets.

458 Together, these considerations suggest that the neuronal pool representing  
459 the RDM inherits its direction and choice related signals from the neuronal pools  
460 representing the targets. We demonstrated that a model of lateral interactions  
461 serving the general purpose of gain control (Carandini and Heeger, 2011) is  
462 sufficient to produce these effects. Such lateral interactions are well established in  
463 upstream visual areas (Schein and Desimone, 1990; Shushruth et al., 2009; Hunter  
464 and Born, 2011) and are believed to be fundamental to many cortical circuits  
465 (Carandini and Heeger, 2011). In LIP, lateral interactions are thought to mediate the  
466 suppressive effect of visual stimuli presented outside a neuron’s RF (Balan et al.,  
467 2008; Churchland et al., 2008; Zhang et al., 2017). Such suppression can arise from  
468 stimuli presented at large distances (>50°) away from the RF, even in the opposite  
469 hemifield (Falkner et al., 2010; Louie et al., 2011). Our modeling exercise  
470 demonstrates that this property of LIP circuits can account for the apparent  
471 direction and choice correlation of the responses of neurons with the RDM in their  
472 RF. To test this model, we would need to record simultaneously from neurons that

473 represent the RDM and at least one choice target.

474 A limitation of the present study is that we do not have access to two classes  
475 of neurons on the same trials. We are therefore unable to test the model proposed to  
476 account for the weaker decision related activity of neurons that contain the RDM in  
477 their RF. For example, we would predict that the weaker leverage of the RDM-in-RF  
478 neurons would be explained away (i.e., mediated) by inclusion of Target-in-RF  
479 responses in the same GLM. Our strategy to record from the same neurons under  
480 two stimulus configurations has the obvious dividend of matching the two groups.  
481 However, it might have led to undersampling neurons with RFs nearer the fovea. We  
482 cannot exclude the possibility that the sensory responses of such neurons would be  
483 more strongly coupled to decision formation.

484

### 485 **Routing of information in cortex**

486 We have shown that in LIP, the neurons that contain the choice targets in  
487 their RF represent the accumulation of evidence bearing on the possibility that this  
488 target will be chosen. The neurons that contain the RDM in their RF do not show  
489 such signatures of evidence accumulation. We do not know how the momentary  
490 evidence represented by populations of direction selective neurons in the visual  
491 cortex makes its way to the target-representing neurons in LIP. There are  
492 projections from areas MT and MST to area LIP, but it is difficult to reconcile this  
493 direct pathway with the long latency of the decision related activity in LIP. The delay  
494 of the decision related responses relative to the latency of the visual responses in  
495 LIP (of ~50 ms), suggests a role for some form of memory buffer and/or a  
496 multisynaptic chain through which decision relevant information must pass before  
497 reaching the saccade planning neurons in LIP. This is just one of many reasons to  
498 suspect that these apparently simple perceptual decisions may share similarities  
499 with more complex decisions that derive evidence from memory and other  
500 evaluations (Shadlen and Shohamy, 2016).

501 We must emphasize that area LIP is not the only region that receives  
502 decision-pertinent signals in this task. Other areas that are involved in the planning  
503 of eye movements like FEF/Area 46, the caudate nucleus and the superior colliculus  
504 also have access to such input (Horwitz and Newsome, 1999; Kim and Shadlen,  
505 1999; Ding and Gold, 2010, 2012; Mante et al., 2013). However, the decision related  
506 activity in these areas arises with comparable latencies, so they do not furnish an  
507 explanation for the long latency in LIP, at least not readily. We favor the idea that  
508 the latency is necessitated by limitations in connectivity between the many possible  
509 sources of evidence bearing on the salience of an item (e.g., a choice target) and the  
510 neurons that represent such items as potential affordances to the motor system  
511 (e.g., neurons in LIP). This connectivity constraint might necessitate active routing  
512 (Olshausen et al., 1993; Kastner and Pinsk, 2004; Summerfield and Tsetsos, 2012),  
513 although this process is poorly understood.

514 Finally, our results expose the limitations of using choice correlations to  
515 implicate a neuronal population as part of the circuit that drives the corresponding  
516 behavior. The neuronal pool in LIP representing the RDM has a mean CP of 0.59,  
517 which is larger than the reported CP of 0.54 for neurons in area MT for the same  
518 task (Cohen and Newsome, 2009). But neuronal populations that do not influence



519 behavior can still have significant choice correlations if they themselves are  
520 correlated with other populations influencing behavior (Shadlen et al., 1996; Pitkow  
521 et al., 2015). In the RDM task, the sequential sampling framework (e.g., drift-  
522 diffusion) provides a detailed mechanistic account of evidence accumulation both at  
523 the level of behavior and at the level of its instantiation in the neural responses. This  
524 enabled us to rigorously test whether a given neural population represents the  
525 computations relevant to decision-making. Only the neuronal population involved in  
526 planning of the motor action needed to report the choice reflected such  
527 computations.

528 If the neurons with the RDM in the RF do not represent the evolving  
529 evidence, a natural question is what do these neurons signify? One obvious  
530 possibility is that they simply represent an object that might attract the gaze as  
531 transient lights are wont to do. Another possibility is that they represent the focus of  
532 spatial attention (Colby and Goldberg, 1999). However, this focus should be initially  
533 on the RDM and then either remain stationary through the decision or gradually  
534 give way to the chosen target. This is inconsistent with the dynamics observed in  
535 our data, which look like a muted version of the decision related signals exhibited by  
536 neurons with a choice target in the RF. The same objection applies to the proposal  
537 that these neurons represent the salience of the RDM (Bisley and Goldberg, 2010). A  
538 more speculative idea is that the neurons that contain the RDM in their RF represent  
539 the object about which the decision is made. Reprising the question posed at the  
540 beginning of this paper, the decision about motion direction is a decision about the  
541 motion of the RDM. While it is formed as if in answer to the question, “How will I  
542 report the answer?,” it is still about a visual stimulus. Perhaps LIP neurons that  
543 represent the RDM confer this critical information bearing on the spatial origins of  
544 the evidence—that is, the location of the thing we are deciding about.

545  
546

## 547 **MATERIALS AND METHODS**

548

### 549 **Neural recordings**

550 We recorded activity of 49 well isolated single units from area LIPv (Lewis  
551 and Van Essen, 2000) of two adult female rhesus monkeys (*Macaca mulatta*) trained  
552 on the random-dot motion direction discrimination task. MRI was used to localize  
553 LIPv and to target recording electrodes. Within this putative LIPv, we recorded from  
554 neurons that had spatially selective persistent activity as assessed using a memory-  
555 guided saccade task (Gnadt and Andersen, 1988). In this task, a target is flashed in  
556 the periphery while the monkey fixates on a central spot. The monkey has to  
557 remember the location of the target and execute a saccade to that location when  
558 instructed. The response field (RF) of each neuron was identified as the region of  
559 visual space that elicited the highest activity during the interval between the target  
560 flash and the eventual saccade.

561 All training, surgery, and experimental procedures were conducted in  
562 accordance with the National Institutes of Health *Guide for Care and Use of*  
563 *Laboratory Animals* and were approved by the University of Washington



564 Institutional Animal Care and Use Committee.

565

## 566 **Task**

567 The choice-reaction time direction discrimination task is similar to previous  
568 studies (Roitman and Shadlen, 2002). The animal initiates a trial by fixating on a  
569 point (fixation point; FP) presented on an otherwise black screen. Two choice-  
570 targets then appear on the screen. After a variable delay (drawn from an  
571 exponential distribution of mean 750 ms), the random-dot motion (RDM) stimulus  
572 is displayed in an imaginary aperture (i.e., invisible borders) of 5°-9° diameter at a  
573 third location. The first three frames of the stimulus consist of white dots randomly  
574 plotted at a density of  $16.7 \text{ dots} \cdot \text{deg}^{-2} \cdot \text{s}^{-1}$ . From the fourth frame, each dot from  
575 three frames before is replotted — either displaced in one direction along the axis  
576 connecting the two targets, or at a random location. The probability with which a  
577 dot is displaced in the direction of one of the targets determines the stimulus  
578 strength (coherence) and on each trial, this was randomly chosen from the set  $C =$   
579  $[0, 0.032, 0.064, 0.128, 0.256, 0.512]$ . The motion strengths and the two directions  
580 were randomly interleaved. Importantly, the monkey was allowed to view the  
581 stimulus as long as it wanted and indicate the perceived direction of motion with a  
582 saccade to the target that lay in that direction to obtain a liquid reward. Rewards  
583 were given randomly ( $p=0.5$ ) for the 0% coherence motion condition.

584 During recording from each isolated neuron, the choice-targets and the RDM  
585 were presented in two configurations (Figure 1). In the ‘Target-in-RF’ configuration,  
586 one of the choice-targets overlay the neuronal RF. In the ‘RDM-in-RF’ configuration,  
587 the RDM stimulus was presented in the RF. The two configurations were alternated  
588 in blocks (typically between 50-150 trials per block). For 33 of the neurons, the  
589 targets and the dot stimuli were placed 120° apart on an imaginary circle (as shown  
590 in Figure 1). For the remaining 16 neurons (in one monkey), the targets and the dot  
591 stimulus were aligned linearly in both configurations. Since the directions of motion  
592 varied across sessions, we adopted the following conventions. In the Target-in-RF  
593 configuration, the direction of motion towards the target in the RF for each neuron  
594 was considered the ‘positive’ direction. In the RDM-in-RF configuration, the positive  
595 direction is assigned post hoc from the data: the direction of motion at the highest  
596 coherence that elicited the higher mean response.

597

## 598 **Analyses of behavioral data**

599 The accuracy and reaction times (RT) of the monkeys were fit by a bounded  
600 evidence accumulation model (Shadlen et al., 2006). In the parsimonious application  
601 of this model employed here, the instantaneous evidence about motion at each time  
602 step is assumed to arise from a normal distribution with variance  $\Delta t$  and mean  $\kappa C$ ,  
603 where  $C$  is the signed motion coherence and  $\kappa$ , a scaling parameter. This  
604 instantaneous evidence is accumulated over time and the decision process  
605 terminates when the accumulated evidence reaches one of the bounds  $\pm B$  leading to  
606 the choice of one of the targets. The mean RT is the expectation of the time taken for  
607 the accumulated evidence to reach the bound plus a constant — the non-decision  
608 time  $t_{nd}$  comprising sensory and motor delays. To account for asymmetric reaction  
609 times in some configurations, we used two different non-decision times ( $t_{nd1}$  and

610  $t_{nd2}$ ) for the two target choices. In this framework, the mean RT for the correct  
611 choices (i.e. choices consistent with drift rate, ignoring biases) is described by the  
612 following equation:

$$613$$
$$614 \quad RT = \frac{B}{\kappa C} \tanh(\kappa CB) + t_{nd} \quad (1)$$

615  
616 Further, the choice distributions are described by

$$617$$
$$618 \quad P_+ = [1 + \exp(-2\kappa CB)]^{-1} \quad (2)$$

619  
620 where  $P_+$  is the probability of choosing the target consistent with the ‘positive’  
621 direction of motion.

622 To demonstrate that a single model accounts for both the choices and the  
623 RTs, we fit only the observed RTs as per Eq. 1 (Gold and Shadlen, 2002; Kang et al.,  
624 2017), and predicted the choice frequencies by substituting the parameters  $\kappa$  and  $B$   
625 in Eq. 2 (Figure 2). We evaluated the fidelity of these predictions by comparing the  
626 predictions to a logistic regression fit of the choice data using the deviance metric  
627 (difference between the log likelihood of the fits). To demonstrate that these  
628 predictions were not a trivial result of monotonic ordering of RTs by motion  
629 strength, we compared them to predictions from 10,000 pseudorandomly generated  
630 RT vs. coherence functions which preserved the order of RTs (Supp. Fig. S1). To  
631 generate these functions, we retained the observed RTs for the minimum and  
632 maximum coherences and used ordered random values within this range for the  
633 other coherences. We then fit these functions to Eq. 1, predicted the choices with Eq.  
634 2, and computed the log-likelihood ratio of these predictions and the original  
635 predictions. We then determined if the predictions worsened significantly as a  
636 function of the mean difference between the original and the randomly generated  
637 RTs.

638 To obtain a more precise estimate of decision times, we fit an elaborated  
639 version of the bounded evidence accumulation model (Supp. Fig. S2),  
640 simultaneously to both choice proportions and reaction times (including both  
641 correct and error trials). In this model, the decision bounds ( $B$ ) collapse with time  
642 ( $t$ ) such that

$$643$$
$$644 \quad B(t) = B_0 - B_1(t - B_{del})^2 \quad \text{for } t > B_{del} \quad (3)$$

645  
646 where  $B_0$  is initial bound height,  $B_1$  is the rate of collapse and  $B_{del}$ , the delay to onset  
647 of collapse. The non-decision time is modeled as a normal distribution with mean  $t_{nd}$   
648 and standard deviation  $t_{nd\_sd}$ . This model was fit by maximizing the log likelihood of  
649 the observed responses (choice and RT) on each trial. The distribution of decision  
650 times for the various coherences were obtained from these model fits. A t-test was  
651 used to determine if these distributions at each stimulus coherence differed  
652 significantly between the two task configurations.

653  
654 **Analyses of neural data**

655 Population responses were computed as the average of all trials from all  
656 neurons after smoothing each trial with a 75 ms wide boxcar filter (Figure 3). The  
657 smoothing was only for visualization and all analyses were conducted on the raw  
658 spike data (1 ms resolution). To visualize the coherence dependent buildup of  
659 activity (Insets of Figure 3A-B), we detrended neuronal responses by subtracting  
660 the average responses across all coherences (separately for each task  
661 configuration).

662 We used responses at the two highest coherences to determine the time at  
663 which motion-direction selectivity arises in a given neural population (Figure 3C).  
664 We averaged the responses in 40 ms bins on each trial at these coherences and  
665 derived receiver operating characteristics (ROC) from these response distributions  
666 at each time bin. The area under the ROC denotes the probability of the neuron  
667 responding more to the positive direction of motion. For each time bin, we applied a  
668 Wilcoxon rank sum test and estimated the response latency as the first of three  
669 successive bins that met statistical significance ( $p < 0.05$ ). We used a bootstrap  
670 procedure to compare the latencies from the two task configurations. For each  
671 configuration, we resampled trials with replacement, matching the number of trials  
672 in the original data sets. We repeated this procedure 1000 times and obtained a pair  
673 of distribution of latencies from the resampled data (one per configuration). The  
674 medians of these distributions recapitulated the latency estimated from the data  
675 (180 and 190 ms for the Target-in-RF and RDM-in-RF respectively). We report the  
676 p-value of a rank sum test (2-tailed) using the bootstrap derived distributions to  
677 evaluate the null hypothesis that the latencies are the same for the two  
678 configurations. We obtained the same result by sampling neurons (instead of trials),  
679 with replacement.

680 We quantified the effect of motion strength on the rate of increase of neural  
681 response ('buildup rate') during the decision-making epoch as the slope of the  
682 response in the time window 180 to 380 ms after stimulus onset (Figure 3D). To  
683 exclude pre-saccadic activity, we discarded from each trial, the spikes occurring up  
684 to 100 ms before saccade onset. We computed by least squares method, the slope  
685 for each neuron at each coherence from the mean detrended response in 10 ms time  
686 bins in the aforementioned time window. We then tested whether these buildup  
687 rates scaled with coherence across the population in each stimulus configuration by  
688 fitting a linear model regressing these buildup rates against signed coherence. We  
689 confirmed that the trends shown in Figure 3D were preserved when the analysis  
690 was done using weighted regression.

691  
692 Leverage of neural activity on behavior: (Figure 4)

693 We measured the leverage of neural activity on the animal's choice in two  
694 ways. First, we fit the monkey's choices with logistic regression

$$695 \quad P_+ = (1 + \exp(-(\beta_0 + \beta_1 C + \beta_2 R)))^{-1} \quad (4)$$

697  
698 where  $P_+$  is the probability of choosing the 'positive' direction target,  $C$  is signed  
699 coherence and  $R$  is the z-scored mean neural response in the time window 100 to  
700 300 ms before saccade. If the variations in firing rate of the neurons have leverage

701 over choice even when the effect of motion coherence is accounted for, then  $\beta_2 \neq 0$ .  
702 We compared  $\beta_2$  across configurations with a signed rank test on their absolute  
703 values. We also quantified the additional leverage of the neural responses on choice  
704 beyond that of the motion strength, by measuring the difference in the deviance of  
705 the full model and the model without the  $R$  term ( $\Delta$ ). Comparisons of  $\Delta$  provided  
706 similar results to the comparisons of the  $\beta_2$  term that are presented in the results.

707 Second, we quantified the trial-by-trial correlations between neuronal  
708 response and the animal's choice in the 0% coherence trials by computing 'choice  
709 probability' (CP) (Britten et al., 1996). For each neuron, we computed the mean  
710 responses on the 0% coherence trials in a time window 100 to 300 ms preceding the  
711 saccade. The trials were separated into two groups based on the animal's choice. We  
712 used the distributions of responses from the two groups to calculate the area under  
713 the ROC, termed the choice probability (CP). We evaluated the null hypothesis that  
714  $|\text{CP}-0.5|=0$  using a permutation test. We permuted the union of responses from both  
715 groups and assigned them randomly to the two choices (matching the number of  
716 trials in each group) and computed the CP. By repeating this procedure 2000 times,  
717 we established the distribution of  $|\text{CP}-0.5|$  under  $H_0$  and report the  $p$  value as the  
718 area to the right of the observed CP minus 0.5.

719 To evaluate whether the CPs from the two configurations were different, we  
720 first converted responses to z-scores (by neuron and configuration) and then  
721 combined the z-scores across neurons. We then computed two CPs, as above, for the  
722 two configurations. To evaluate the null hypothesis that the two CPs are equal, we  
723 performed another permutation test, this time preserving the association with  
724 choice but permuting the association with configuration. We obtained the  
725 distribution of the difference in CP ( $|\Delta\text{CP}|$ ) under  $H_0$  from 2000 repetitions of the  
726 permutation procedure and report the  $p$  value as the area of this distribution that is  
727 greater than the observed  $|\Delta\text{CP}|$  from the data.

728 We also quantified the correlation between the buildup rates and RT. We  
729 used trials in which the monkey chose the 'positive' direction target, including all  
730 such trials at 0% motion strength and only correct trials at positive motion  
731 strengths. For each trial, we computed the slope of the response between 180-420  
732 ms after RDM onset (using 40 ms time bins) from the detrended responses. To  
733 remove the effect of coherence on RT, we standardized (i.e., z-scored) both the RTs  
734 and the buildup rates within each coherence and computed the correlation between  
735 them.

736

### 737 Variance and correlation analysis:

738 To evaluate if the neuronal firing rates on individual trials during the  
739 decision-making epoch reflect a process of accumulation of noisy evidence, we  
740 analyzed the pattern of variance and autocorrelation of the responses (Churchland  
741 et al., 2011; de Lafuente et al., 2015). We were interested in the variance  
742 attributable to such an accumulation process. For the  $i^{\text{th}}$  time bin, this variance  
743 ( $s^2_{\langle Ni \rangle}$ ) is the fraction of the total measured variance ( $s^2_{Ni}$ ) remaining after  
744 accounting for the point process variance (PPV), that is, the variance expected even  
745 if the underlying rates were constant. Assuming the PPV is proportional to the mean  
746 count,

747

748

$$s^2_{\langle Ni \rangle} = s^2_{Ni} - \varphi \langle Ni \rangle \quad (5)$$

749

750 where  $\varphi$  is a constant that must be estimated. Since our goal was to compare how  
751 well the firing rates conform to a diffusion process, we allowed  $\varphi$  to be a free  
752 parameter and fit it to obtain the best conformity to the autocorrelation pattern for  
753 a running sum of independent, identically distributed random numbers. For an  
754 unbounded diffusion process, the correlation between the  $i^{\text{th}}$  and  $j^{\text{th}}$  time steps is

755

756

$$R_{ij} = \sqrt{(\min(i,j)/\max(i,j))} \quad (6)$$

757

758

759

760

761

762

763

764

765

766

767

768

769

770

771

772

We characterized the variance and autocorrelation from six 60 ms time bins between 180-540 ms after stimulus onset, ignoring any time bins that extended to within 100 ms of the saccade. To pool data across neurons, we used the residuals for each trial as follows. The mean response of a trial in each time bin was subtracted from the mean of the responses from all the trials for that neuron for the same signed coherence in that time bin. We computed the covariance matrix from the residuals for the six time bins. We used an initial guess for  $\varphi$  to calculate the variance (Eq. 5) and substituted this along the diagonal of the covariance matrix. The correlation was derived from this covariance matrix by dividing each term  $ij$  by  $\sqrt{(s^2_i * s^2_j)}$ . We used Nelder-Mead simplex method (MATLAB function '*fminsearch*') to find the  $\varphi$  that minimized the sum of squares of the difference between the z-transformed calculated correlation and the z-transformed theoretically predicted correlation. Note that the values of  $\varphi$  were not constrained to be the same in the Target-in-RF ( $\varphi = 0.42$ ) and RDM-in-RF ( $\varphi = 0.39$ ) configurations even though theoretically they should be.

773

774

775

776

777

778

779

780

781

782

783

784

785

786

787

788

789

We computed the variance for the six time bins using the  $\varphi$  values from the fit and estimated the standard errors from a bootstrap (Figure 5). We then evaluated the effect of time on the variance using least squares regression. We performed these analyses over a range of plausible values of  $\varphi$  and confirmed that only the absolute values of the variances differed, whereas the shape of the variance function over time was unaffected. We similarly computed the variance and its standard error for time bins aligned to the onset of the saccade. We used a t-test to compare the variance in the two time bins immediately preceding the saccade.

790

791

792

To quantify how well the measured correlation values conform to theoretical predictions, we formed a sum of square (SS) statistic from the 15 pairs of observed and theoretical correlations (after Fisher-z transformation, Figure 6D-E). We used a bootstrap procedure to estimate the distribution of this statistic by sampling with replacement from the data and following the steps above (100 iterations). We used a Kalmogorov-Smirnov test to determine the significance of the difference between the distribution of the SS statistics between the RDM-in-RF and the Target-in-RF configurations.

793

794

## Model

795

796

797

We simulated the spike rates of three neural populations during the RDM epoch — one population with the RDM in their RF and two with targets in their RF



793 (Figure 7A). The Dots-in-RF population was modeled as having an exponential rise  
794 in firing rate starting at 50 ms after RDM onset and peaking at 130 ms (Figure 7C). It  
795 then maintained the peak response until 500 ms. The two Target-in-RF populations  
796 were modeled as maintaining a steady response ( $R_0$ ) up to 180 ms after RDM onset  
797 and then following drift diffusion dynamics until 500 ms (Figure 7B). The response  
798  $R$  at time  $t$  in the dynamic epoch was

$$800 \quad R(t) = R_0 + \kappa t + N(t) \quad (7)$$

801 where  $\kappa$  is the deterministic drift component and  $N(t)$ , the diffusion component — a  
802 running sum of random numbers sampled at every time step ( $\Delta t$ ) from a normal  
803 distribution of zero mean and variance of  $V^2\Delta t$  ( $V = 40$ ). The drift component was  
804 positive for one target population and negative for the other. We then implemented  
805 divisive suppression between the three populations of the form  
806

$$808 \quad R_1 = \frac{R'_1}{1 + \omega_{21}R'_2 + \omega_{31}R'_3} \quad (8)$$

809 where  $R'$  and  $R$  denote the unsuppressed and suppressed responses, respectively,  
810 of the population indicated by the subscript, and  $\omega_{ij}$  is the weight of the influence of  
811 the  $i^{\text{th}}$  population on the  $j^{\text{th}}$ .

812 The parameters were chosen so that the simulated mean responses of the  
813 suppressed population would approximate the observed mean population firing  
814 rates at the 25.6% coherence condition (Figure 7F-G). We first estimated the  
815 suppression of two target populations on each other ( $\omega_{T_1T_2}$  and  $\omega_{T_2T_1}$ ) from the  
816 peak and steady state responses of the neurons to the appearance of a target in their  
817 RF. We then estimated the weight of suppressive influence of the RDM-in-RF  
818 population on the Target-in-RF populations ( $\omega_{DTx}$ ) using the firing rates at the  
819 trough of the response dip following the onset of RDM (arrow in Figure 7G). The  
820 influences of the two Target-in-RF populations on the RDM-in-RF population  $\omega_{TxD}$   
821 were adjusted around  $\omega_{DTx}$  to mimic the observed separation in mean responses of  
822 the RDM-in-RF population to the two directions of motion. Such asymmetry of the  
823 influence of the two Target-in-RF populations might arise from the different spatial  
824 relationship they might have with the RDM-in-RF population. Such asymmetries are  
825 likely for the other pairs of  $\omega$ s too, but we set them to be equal here to simplify the  
826 model. We used the weights of suppression to estimate the underlying  
827 unsuppressed mean responses of each of the populations (Figure 7B-C).

828 We simulated 10,000 trials implementing divisive suppression between the  
829 three populations. For simplicity, we did not implement any temporal dynamics to  
830 the suppression and computed it based on the responses in the preceding time  
831 window. The weight of suppression varied every 10 ms, and was drawn from a  
832 normal distribution whose mean was the estimated weight  $\omega_{ij}$  and the variance  
833  $0.3\omega_{ij}$ .

834  
835



## 836 REFERENCES

837

838 Andersen RA, Buneo CA (2002) Intentional maps in posterior parietal cortex. *Annu Rev*  
839 *Neurosci* 25:189-220.

840 Balan PF, Oristaglio J, Schneider DM, Gottlieb J (2008) Neuronal correlates of the set-  
841 size effect in monkey lateral intraparietal area. *PLoS Biol* 6:e158.

842 Barash S, Bracewell RM, Fogassi L, Gnadt JW, Andersen RA (1991a) Saccade-related  
843 activity in the lateral intraparietal area. I. Temporal properties; comparison with  
844 area 7a. *J Neurophysiol* 66:1095-1108.

845 Barash S, Bracewell RM, Fogassi L, Gnadt JW, Andersen RA (1991b) Saccade-related  
846 activity in the lateral intraparietal area. II. Spatial properties. *J Neurophysiol*  
847 66:1109-1124.

848 Bennur S, Gold JI (2011) Distinct representations of a perceptual decision and the  
849 associated oculomotor plan in the monkey lateral intraparietal area. *J Neurosci*  
850 31:913-921.

851 Bisley JW, Goldberg ME (2010) Attention, intention, and priority in the parietal lobe.  
852 *Annu Rev Neurosci* 33:1-21.

853 Bollimunta A, Ditterich J (2011) Local Computation of Decision-Relevant Net Sensory  
854 Evidence in Parietal Cortex. *Cereb Cortex*.

855 Bollimunta A, Totten D, Ditterich J (2012) Neural dynamics of choice: single-trial  
856 analysis of decision-related activity in parietal cortex. *J Neurosci* 32:12684-  
857 12701.

858 Britten KH, Newsome WT, Shadlen MN, Celebrini S, Movshon JA (1996) A relationship  
859 between behavioral choice and the visual responses of neurons in macaque MT.  
860 *Vis Neurosci* 13:87-100.

861 Bushnell MC, Goldberg ME, Robinson DL (1981) Behavioral enhancement of visual  
862 responses in monkey cerebral cortex. I. Modulation in posterior parietal cortex  
863 related to selective visual attention. *J Neurophysiol* 46:755-772.

864 Carandini M, Heeger DJ (2011) Normalization as a canonical neural computation. *Nat*  
865 *Rev Neurosci* 13:51-62.

866 Churchland AK, Kiani R, Shadlen MN (2008) Decision-making with multiple  
867 alternatives. *Nat Neurosci* 11:693-702.

868 Churchland AK, Kiani R, Chaudhuri R, Wang XJ, Pouget A, Shadlen MN (2011) Variance  
869 as a signature of neural computations during decision making. *Neuron* 69:818-  
870 831.

871 Cisek P (2007) Cortical mechanisms of action selection: the affordance competition  
872 hypothesis. *Philos Trans R Soc Lond B Biol Sci* 362:1585-1599.

873 Cisek P, Kalaska JF (2005) Neural correlates of reaching decisions in dorsal premotor  
874 cortex: specification of multiple direction choices and final selection of action.  
875 *Neuron* 45:801-814.

876 Cisek P, Kalaska JF (2010) Neural mechanisms for interacting with a world full of action  
877 choices. *Annu Rev Neurosci* 33:269-298.

878 Cohen MR, Newsome WT (2009) Estimates of the contribution of single neurons to

879 perception depend on timescale and noise correlation. *J Neurosci* 29:6635-6648.  
880 Colby CL, Goldberg ME (1999) Space and attention in parietal cortex. *Annu Rev*  
881 *Neurosci* 22:319-349.  
882 de Lafuente V, Jazayeri M, Shadlen MN (2015) Representation of accumulating  
883 evidence for a decision in two parietal areas. *J Neurosci* 35:4306-4318.  
884 Ding L, Gold JI (2010) Caudate encodes multiple computations for perceptual decisions.  
885 *J Neurosci* 30:15747-15759.  
886 Ding L, Gold JI (2012) Neural correlates of perceptual decision making before, during,  
887 and after decision commitment in monkey frontal eye field. *Cereb Cortex*  
888 22:1052-1067.  
889 Falkner AL, Krishna BS, Goldberg ME (2010) Surround suppression sharpens the priority  
890 map in the lateral intraparietal area. *J Neurosci* 30:12787-12797.  
891 Fanini A, Assad JA (2009) Direction selectivity of neurons in the macaque lateral  
892 intraparietal area. *J Neurophysiol* 101:289-305.  
893 Freedman DJ, Assad JA (2006) Experience-dependent representation of visual  
894 categories in parietal cortex. *Nature* 443:85-88.  
895 Freedman DJ, Assad JA (2011) A proposed common neural mechanism for  
896 categorization and perceptual decisions. *Nat Neurosci* 14:143-146.  
897 Gnadt JW, Andersen RA (1988) Memory related motor planning activity in posterior  
898 parietal cortex of macaque. *Experimental brain research* 70:216-220.  
899 Gold JI, Shadlen MN (2000) Representation of a perceptual decision in developing  
900 oculomotor commands. *Nature* 404:390-394.  
901 Gold JI, Shadlen MN (2002) Banburismus and the brain: decoding the relationship  
902 between sensory stimuli, decisions, and reward. *Neuron* 36:299-308.  
903 Gold JI, Shadlen MN (2003) The influence of behavioral context on the representation  
904 of a perceptual decision in developing oculomotor commands. *J Neurosci*  
905 23:632-651.  
906 Goodwin SJ, Blackman RK, Sakellaridi S, Chafee MV (2012) Executive control over  
907 cognition: stronger and earlier rule-based modulation of spatial category signals  
908 in prefrontal cortex relative to parietal cortex. *J Neurosci* 32:3499-3515.  
909 Hanes DP, Schall JD (1996) Neural control of voluntary movement initiation. *Science*  
910 274:427-430.  
911 Hanks T, Kiani R, Shadlen MN (2014) A neural mechanism of speed-accuracy tradeoff in  
912 macaque area LIP. *Elife* 3.  
913 Hanks TD, Mazurek ME, Kiani R, Hopp E, Shadlen MN (2011) Elapsed decision time  
914 affects the weighting of prior probability in a perceptual decision task. *J*  
915 *Neurosci* 31:6339-6352.  
916 Horwitz GD, Newsome WT (1999) Separate signals for target selection and movement  
917 specification in the superior colliculus. *Science* 284:1158-1161.  
918 Hunter JN, Born RT (2011) Stimulus-dependent modulation of suppressive influences in  
919 MT. *J Neurosci* 31:678-686.  
920 Janssen P, Shadlen MN (2005) A representation of the hazard rate of elapsed time in  
921 macaque area LIP. *Nat Neurosci* 8:234-241.  
922 Kang HR, Petzschner FH, Wolpert DM, Shadlen MN (2017) Piercing of consciousness as

- 923 a threshold crossing operation. *Current biology* : CB In press.
- 924 Kastner S, Pinsk MA (2004) Visual attention as a multilevel selection process. *Cogn*  
925 *Affect Behav Neurosci* 4:483-500.
- 926 Kim JN, Shadlen MN (1999) Neural correlates of a decision in the dorsolateral prefrontal  
927 cortex of the macaque. *Nat Neurosci* 2:176-185.
- 928 Klaes C, Westendorff S, Chakrabarti S, Gail A (2011) Choosing goals, not rules: deciding  
929 among rule-based action plans. *Neuron* 70:536-548.
- 930 Kubanek J, Snyder LH (2015) Reward-based decision signals in parietal cortex are  
931 partially embodied. *J Neurosci* 35:4869-4881.
- 932 Lewis JW, Van Essen DC (2000) Mapping of architectonic subdivisions in the macaque  
933 monkey, with emphasis on parieto-occipital cortex. *The Journal of comparative*  
934 *neurology* 428:79-111.
- 935 Louie K, Grattan LE, Glimcher PW (2011) Reward value-based gain control: divisive  
936 normalization in parietal cortex. *J Neurosci* 31:10627-10639.
- 937 Mante V, Sussillo D, Shenoy KV, Newsome WT (2013) Context-dependent computation  
938 by recurrent dynamics in prefrontal cortex. *Nature* 503:78-84.
- 939 Mazurek ME, Roitman JD, Ditterich J, Shadlen MN (2003) A role for neural integrators in  
940 perceptual decision making. *Cereb Cortex* 13:1257-1269.
- 941 Mazzone P, Bracewell RM, Barash S, Andersen RA (1996) Motor intention activity in the  
942 macaque's lateral intraparietal area. I. Dissociation of motor plan from sensory  
943 memory. *J Neurophysiol* 76:1439-1456.
- 944 Newsome WT, Britten KH, Movshon JA (1989) Neuronal correlates of a perceptual  
945 decision. *Nature* 341:52-54.
- 946 Olshausen BA, Anderson CH, Van Essen DC (1993) A neurobiological model of visual  
947 attention and invariant pattern recognition based on dynamic routing of  
948 information. *J Neurosci* 13:4700-4719.
- 949 Palmer J, Huk AC, Shadlen MN (2005) The effect of stimulus strength on the speed and  
950 accuracy of a perceptual decision. *J Vis* 5:376-404.
- 951 Pitkow X, Liu S, Angelaki DE, DeAngelis GC, Pouget A (2015) How Can Single Sensory  
952 Neurons Predict Behavior? *Neuron* 87:411-423.
- 953 Platt ML, Glimcher PW (1999) Neural correlates of decision variables in parietal cortex.  
954 *Nature* 400:233-238.
- 955 Rao V, DeAngelis GC, Snyder LH (2012) Neural correlates of prior expectations of  
956 motion in the lateral intraparietal and middle temporal areas. *J Neurosci*  
957 32:10063-10074.
- 958 Roitman JD, Shadlen MN (2002) Response of neurons in the lateral intraparietal area  
959 during a combined visual discrimination reaction time task. *J Neurosci* 22:9475-  
960 9489.
- 961 Rorie AE, Gao J, McClelland JL, Newsome WT (2010) Integration of sensory and reward  
962 information during perceptual decision-making in lateral intraparietal cortex  
963 (LIP) of the macaque monkey. *PloS one* 5:e9308.
- 964 Sarma A, Masse NY, Wang XJ, Freedman DJ (2015) Task-specific versus generalized  
965 mnemonic representations in parietal and prefrontal cortices. *Nat Neurosci*.
- 966 Sceniak MP, Hawken MJ, Shapley R (2001) Visual spatial characterization of macaque

- 967 V1 neurons. *J Neurophysiol* 85:1873-1887.
- 968 Schein SJ, Desimone R (1990) Spectral properties of V4 neurons in the macaque. *J*
- 969 *Neurosci* 10:3369-3389.
- 970 Selen LP, Shadlen MN, Wolpert DM (2012) Deliberation in the motor system: reflex
- 971 gains track evolving evidence leading to a decision. *J Neurosci* 32:2276-2286.
- 972 Sereno AB, Maunsell JH (1998) Shape selectivity in primate lateral intraparietal cortex.
- 973 *Nature* 395:500-503.
- 974 Shadlen MN, Newsome WT (1996) Motion perception: seeing and deciding. *Proc Natl*
- 975 *Acad Sci U S A* 93:628-633.
- 976 Shadlen MN, Kiani R (2013) Decision making as a window on cognition. *Neuron* 80:791-
- 977 806.
- 978 Shadlen MN, Shohamy D (2016) Decision Making and Sequential Sampling from
- 979 Memory. *Neuron* 90:927-939.
- 980 Shadlen MN, Britten KH, Newsome WT, Movshon JA (1996) A computational analysis
- 981 of the relationship between neuronal and behavioral responses to visual motion.
- 982 *J Neurosci* 16:1486-1510.
- 983 Shadlen MN, Kiani R, Hanks TD, Churchland AK (2008) An intentional framework. In:
- 984 *Better than conscious?* (Engel C, Singer W, eds), pp 71-101.
- 985 Shadlen MN, Hanks TD, Churchland AK, Kiani R, Yang T (2006) The speed and accuracy
- 986 of a simple perceptual decision: a mathematical primer. *Bayesian brain:*
- 987 *Probabilistic approaches to neural coding:*209-237.
- 988 Shushruth S, Ichida JM, Levitt JB, Angelucci A (2009) Comparison of spatial summation
- 989 properties of neurons in macaque V1 and V2. *J Neurophysiol* 102:2069-2083.
- 990 Smith PL, Ratcliff R (2004) Psychology and neurobiology of simple decisions. *Trends*
- 991 *Neurosci* 27:161-168.
- 992 Sugrue LP, Corrado GS, Newsome WT (2004) Matching behavior and the
- 993 representation of value in the parietal cortex. *Science* 304:1782-1787.
- 994 Summerfield C, Tsetsos K (2012) Building Bridges between Perceptual and Economic
- 995 Decision-Making: Neural and Computational Mechanisms. *Front Neurosci* 6:70.
- 996 Swaminathan SK, Freedman DJ (2012) Preferential encoding of visual categories in
- 997 parietal cortex compared with prefrontal cortex. *Nat Neurosci* 15:315-320.
- 998 Toth LJ, Assad JA (2002) Dynamic coding of behaviourally relevant stimuli in parietal
- 999 cortex. *Nature* 415:165-168.
- 1000 Zhang W, Falkner AL, Krishna BS, Goldberg ME, Miller KD (2017) Coupling between
- 1001 One-Dimensional Networks Reconciles Conflicting Dynamics in LIP and Reveals
- 1002 Its Recurrent Circuitry. *Neuron* 93:221-234.

## 1003 FIGURE LEGENDS

1004

### 1005 **FIGURE 1: Behavioral task configurations:**

1006 The monkey fixates at an instructed location (x) and then two choice targets (red  
1007 dots) appear in one of two configurations: (1) *Target-in-RF*: One of the targets is  
1008 situated in the RF of the neuron being recorded from, and (2) *RDM-in-RF*: Both  
1009 targets are situated outside the RF. In the next step, the RDM is presented either  
1010 inside (RDM-in-RF) or outside the RF (Target-in-RF). The monkey is free to report  
1011 its decision any time after the appearance of the RDM by making a saccade to one of  
1012 the targets.

1013

### 1014 **FIGURE 2: Predicting choices from diffusion-to-bound models fit to RTs:**

1015 **A-D**: RTs of the two monkeys as a function of motion strength in the two task  
1016 configurations (see Methods for convention on sign of motion strength). Solid lines  
1017 show the fits of a diffusion-to-bound model. Data includes all trials at 0% motion  
1018 strength (sorted by the animal's choice) and correct trials at other motion strengths.  
1019 **E-H**: The probability the monkey chooses the target consistent with positive motion  
1020 direction, plotted as a function of motion strength. The dashed lines are predictions  
1021 from the corresponding fits of the RTs.

1022

### 1023 **FIGURE 3: Neural population responses:**

1024 Average response of the recorded neural population during Target-in-RF (**A,B**) and  
1025 RDM-in-RF (**C,D**) configurations. Panels **A,C** are aligned to the onset of RDM and  
1026 include all trials sorted by direction and strength of motion. Insets show responses  
1027 de-trended by subtracting the mean response to all motion strengths. Panels **C,D** are  
1028 aligned to the saccade and includes correct trials (and 0% coherence trials sorted by  
1029 the animal's choices). **E**: Area under ROC for responses to the two directions of  
1030 motion at 51.2% coherence computed in 40 ms bins. The colored lines at the bottom  
1031 indicate the time bins in which this metric was significantly  $>0.5$  for the  
1032 corresponding configuration. **F**: The relation between the response buildup rate and  
1033 motion strength. Filled circles are data from trials with motion in the neuron's  
1034 preferred direction and unfilled circles for the opposite motion direction. Solid and  
1035 dashed lines are corresponding linear regression model fits.

1036

### 1037 **FIGURE 4: Leverage of neural activity on behavior:**

1038 Scatter plot and histograms for the two stimulus configurations showing the  
1039 distribution of  $\beta_2$  term (**A**) of logistic regression (Eq. 4), choice probability (**B**) and  
1040 coefficient of correlation (**C**) between slope of response buildup and RT. Neurons for  
1041 which the metric was significant are shown with a blue fill (significant in the Target-  
1042 in-RF configuration) and/or a green border (significant in the RDM-in-RF  
1043 configuration) in the scatter plots and as darker colors in the histograms. Data  
1044 points in **B** outside the axes indicate neurons where choice probability could be  
1045 determined for only one of the two configurations. One and three such data points  
1046 are not shown in the scatter plots of **A** and **C** respectively.

1047



1048 **FIGURE 5: Variance of responses:**

1049 The variance of neural responses aligned to the onset of RDM (**A**) or to the saccade  
1050 (**B**). Total variance is computed in 60 ms bins and the point process variance  
1051 subtracted from it (see Methods). In **B**, solid lines are data from trials in which the  
1052 animal chose the preferred target of the neuron and dashed lines are from trials  
1053 with the opposite choice.

1054

1055 **FIGURE 6: Autocorrelation of responses:**

1056 **A:** Theoretical prediction of the autocorrelation between different time bins ( $i, j$ ) for  
1057 a diffusion process. **B, C:** Estimated autocorrelation for the neural responses in the  
1058 two stimulus configurations. **D, E:** Deviation of **B, C** from the theoretical predictions  
1059 shown in **A**. **F, G:** Comparison of correlation values in **A-C** between theory (black  
1060 lines) and data (colored lines). Solid lines are correlation along the top row  
1061 (between first and  $j^{\text{th}}$  time bins) and dashed lines along the first juxtadiagonal  
1062 (correlation between  $j^{\text{th}}$  and its preceding time bins).

1063

1064 **FIGURE 7: Model:**

1065 **A:** Schematic of the three populations simulated in the model – one population  
1066 representing the RDM (D) and two representing the targets ( $T_1$  and  $T_2$ ). The  $\omega$  terms  
1067 denote the suppressive influence of each population on the other two. **B:** Average  
1068 response of simulated  $T_1$  (solid cyan) and  $T_2$  (dashed cyan) populations across trials  
1069 in which the direction of motion supported  $T_1$ . Dark and light gray traces show  
1070 responses to 10 example trials for the two populations. **C:** The mean and example  
1071 trial responses of the D population to the two directions of motion. Dark and light  
1072 gray indicate motion towards  $T_1$  and  $T_2$ , respectively, but the traces overlap  
1073 considerably. Solid and dashed cyan lines denote the corresponding average  
1074 response traces, but they too overlap. **D, E:** The responses of the three populations  
1075 after implementation of divisive suppression. Color scheme is the same as in panels  
1076 **B** and **C**. **F, G:** The average responses of the recorded neural population to the 25.6%  
1077 motion strength stimulus in the Target-in-RF and RDM-in-RF configurations that  
1078 our simulations approximated. These traces are the same as the cyan traces in  
1079 [Figure 3A & C](#).

1080

1081 **FIGURE 8: Variance and correlation of the simulated responses:**

1082 **A:** Variance as a function of time in two of the simulated suppressed populations (D  
1083 and  $T_1$  for trials with motion supporting  $T_1$  choice). **B-D:** Theoretical autocorrelation  
1084 and the autocorrelations in the two simulated suppressed populations. **E:**  
1085 Comparison of correlation values along the top row (solid lines) and first  
1086 juxtadiagonal (dashed lines) between theory (black lines) and simulations (colored  
1087 lines).

1088

1089 **SUPPLEMENTARY FIGURE S1: Effect of perturbing RTs on the ability to predict**  
1090 **choices:**

1091 Ratio of the log-likelihoods of the choice functions predicted from fitting a diffusion-  
1092 to-bound model to either the measured RTs or to sets of RTs randomly generated  
1093 while preserving their ordering w.r.t. motion strength. The red lines shows this ratio



1094 for logistic regression on the measured choice function. The ratios are plotted as a  
1095 function of the mean difference between the sets of random RTs and the measured  
1096 RTs. Black lines are the slopes from a linear regression model.

1097

1098 **SUPPLEMENTARY FIGURE S2: Simultaneous fit of RT and choice with a**  
1099 **diffusion-to-bound model:**

1100 The RTs (***A,B***) and the fraction of correct choices (***C,D***) plotted as a function of  
1101 stimulus strength for the two monkeys in the two stimulus configurations. The lines  
1102 are fits to this data from a diffusion-to-bound model. The fit parameters are shown  
1103 in [Table 1](#). ***E,F***: The decision times for the different coherences derived from the  
1104 model fits.

1105

1106 **SUPPLEMENTARY FIGURES S3 and S4: Population responses of neurons in**  
1107 **individual animals:**

1108 Neural responses that were shown in [Figure 3](#), panels A, B and D plotted from data  
1109 pooled separately for each individual monkey.

## TABLES

Table 1: Bounded diffusion model best fit parameter values ( $\pm$ SE)

| <b>Parameter</b> | <b>Monkey N<br/>(Target-in-RF)</b> | <b>Monkey N<br/>(RDM-in-RF)</b> | <b>Monkey B<br/>(Target-in-<br/>RF)</b> | <b>Monkey B<br/>(RDM-in-RF)</b> |
|------------------|------------------------------------|---------------------------------|-----------------------------------------|---------------------------------|
| $\kappa$         | $15.96 \pm 0.45$                   | $13.94 \pm 0.45$                | $9.45 \pm 0.31$                         | $12.06 \pm 0.77$                |
| $B_o$            | $0.73 \pm 0.02$                    | $0.78 \pm 0.02$                 | $0.54 \pm 0.02$                         | $0.47 \pm 0.03$                 |
| $B_{del}$        | $0.00 \pm 0.00$                    | $0.00 \pm 0.00$                 | $0.00 \pm 0.00$                         | $0.00 \pm 0.00$                 |
| $B_2$            | $0.68 \pm 0.08$                    | $0.97 \pm 0.07$                 | $1.15 \pm 0.15$                         | $1.10 \pm 0.38$                 |
| $t_{nd}$         | $0.36 \pm 0.01$                    | $0.31 \pm 0.01$                 | $0.43 \pm 0.01$                         | $0.44 \pm 0.01$                 |
| $t_{nd\_sd}$     | $0.13 \pm 0.00$                    | $0.12 \pm 0.00$                 | $0.07 \pm 0.00$                         | $0.07 \pm 0.00$                 |

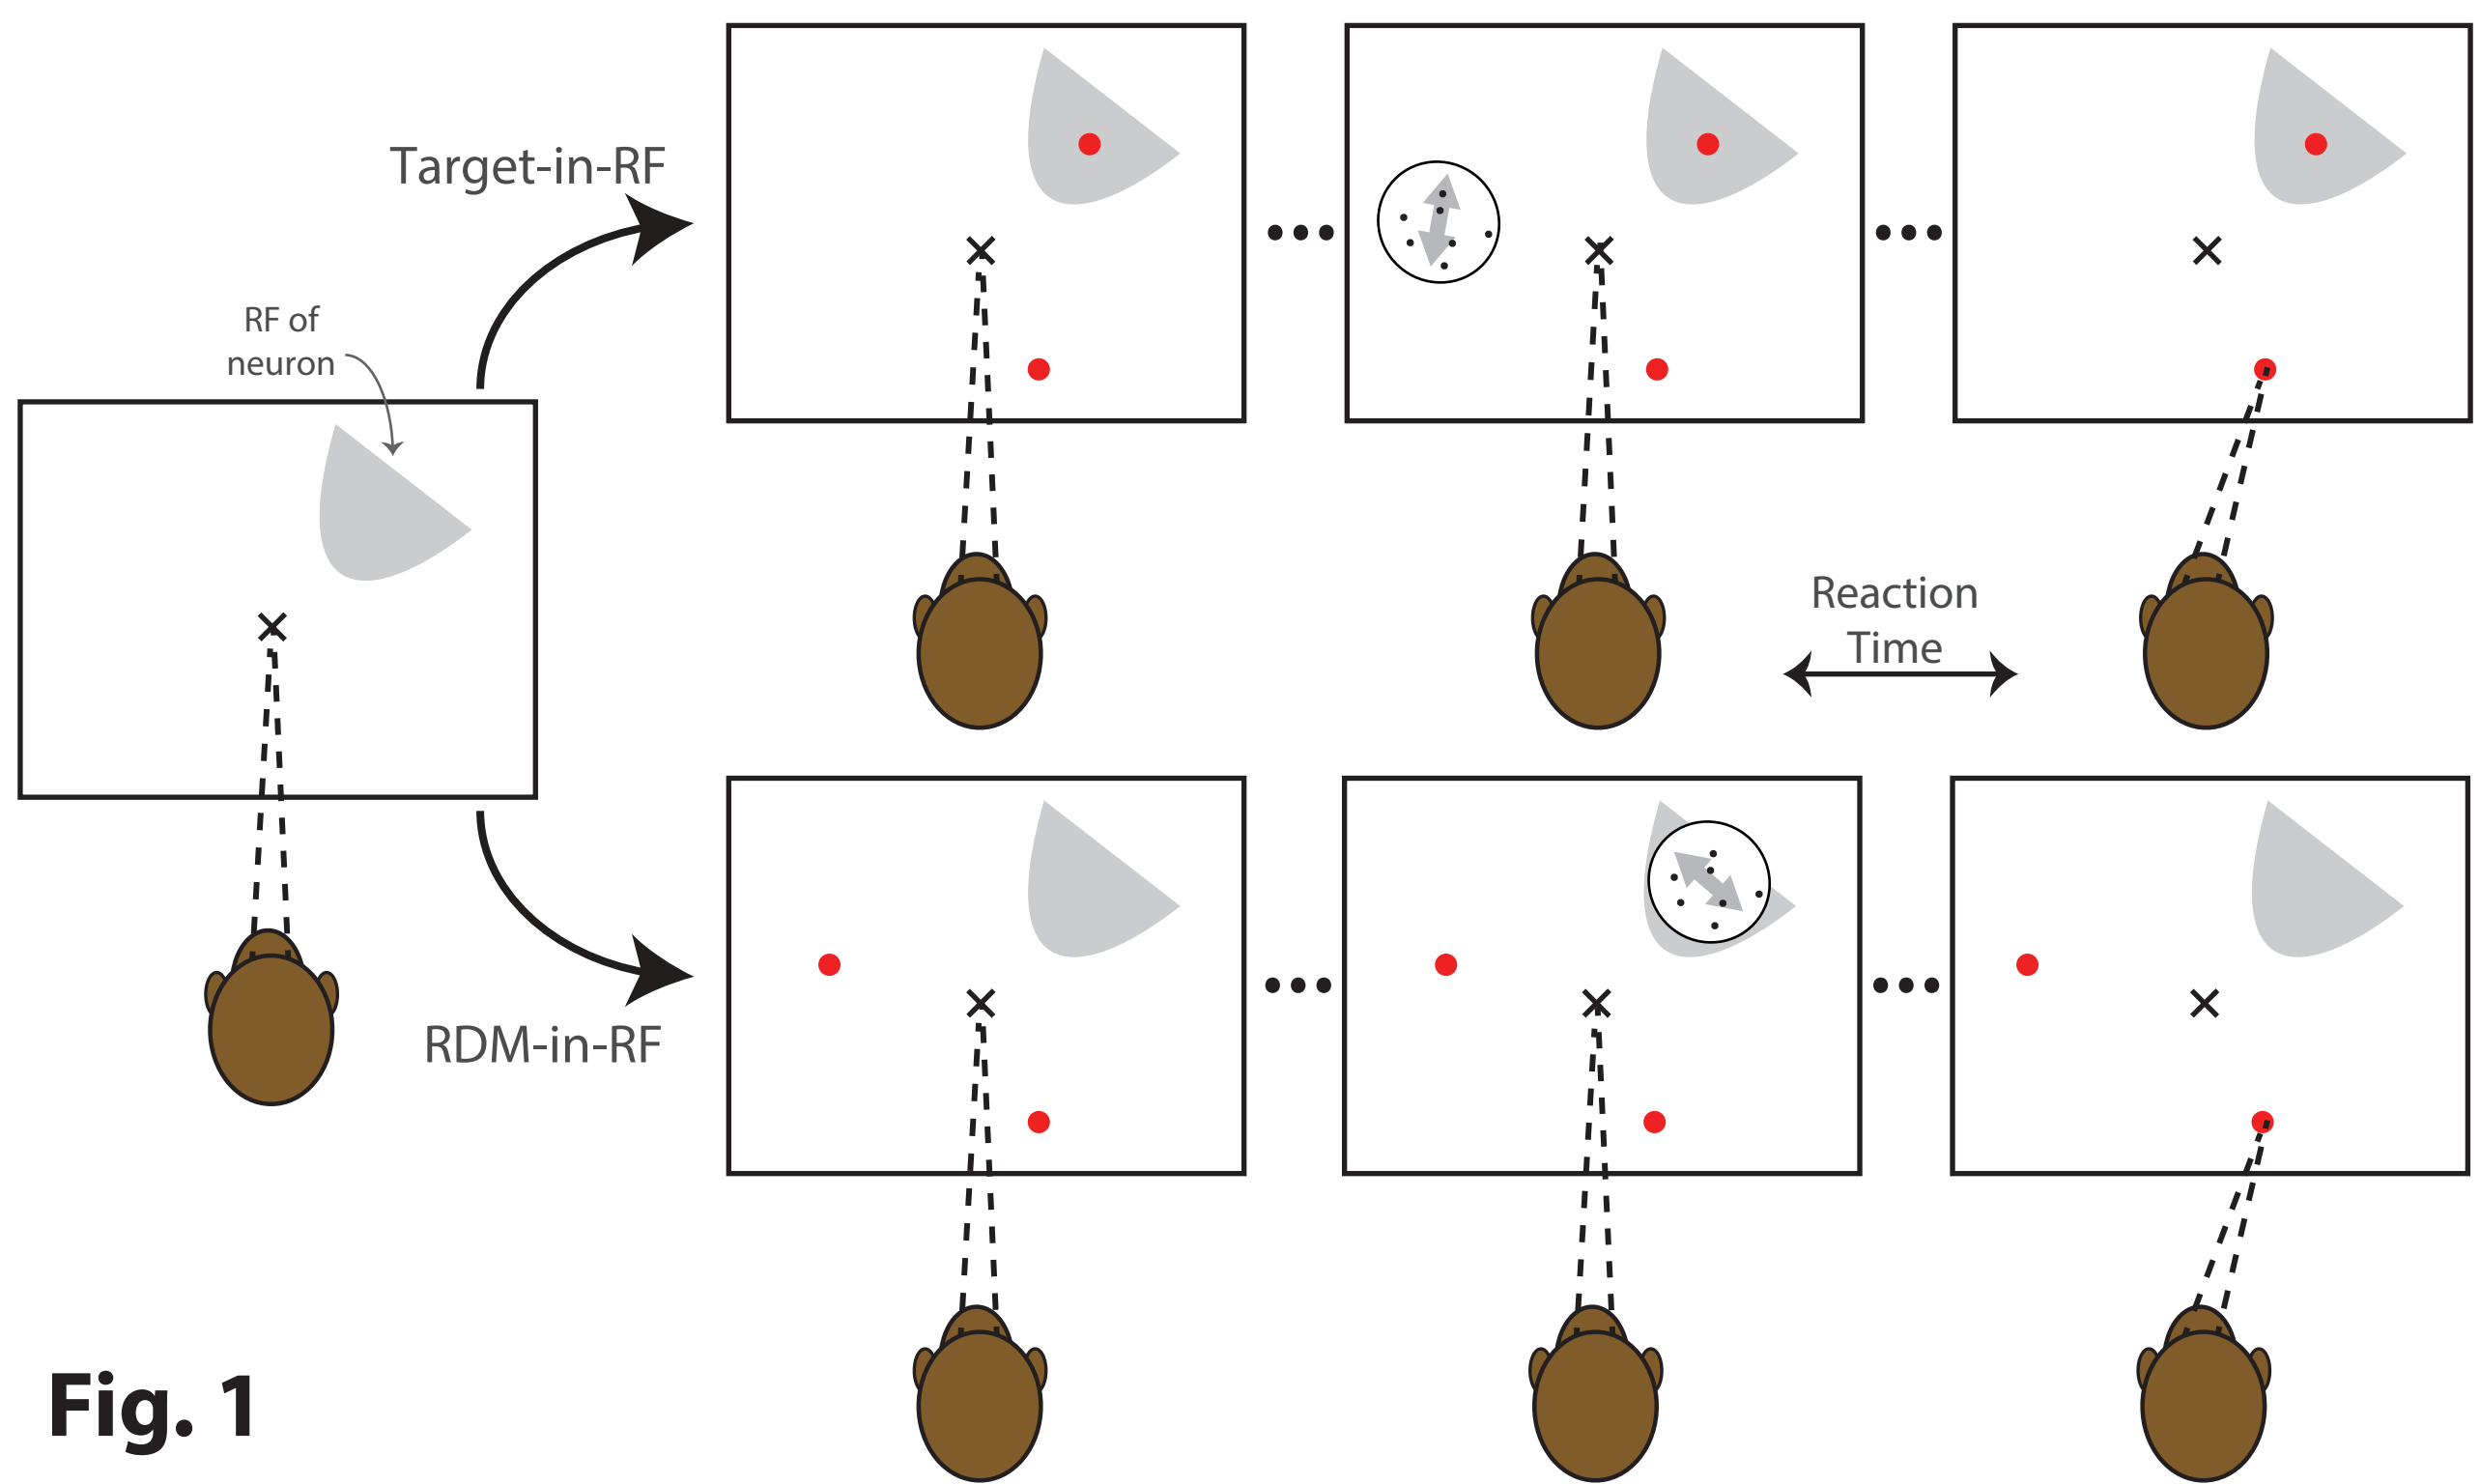

**Fig. 1**

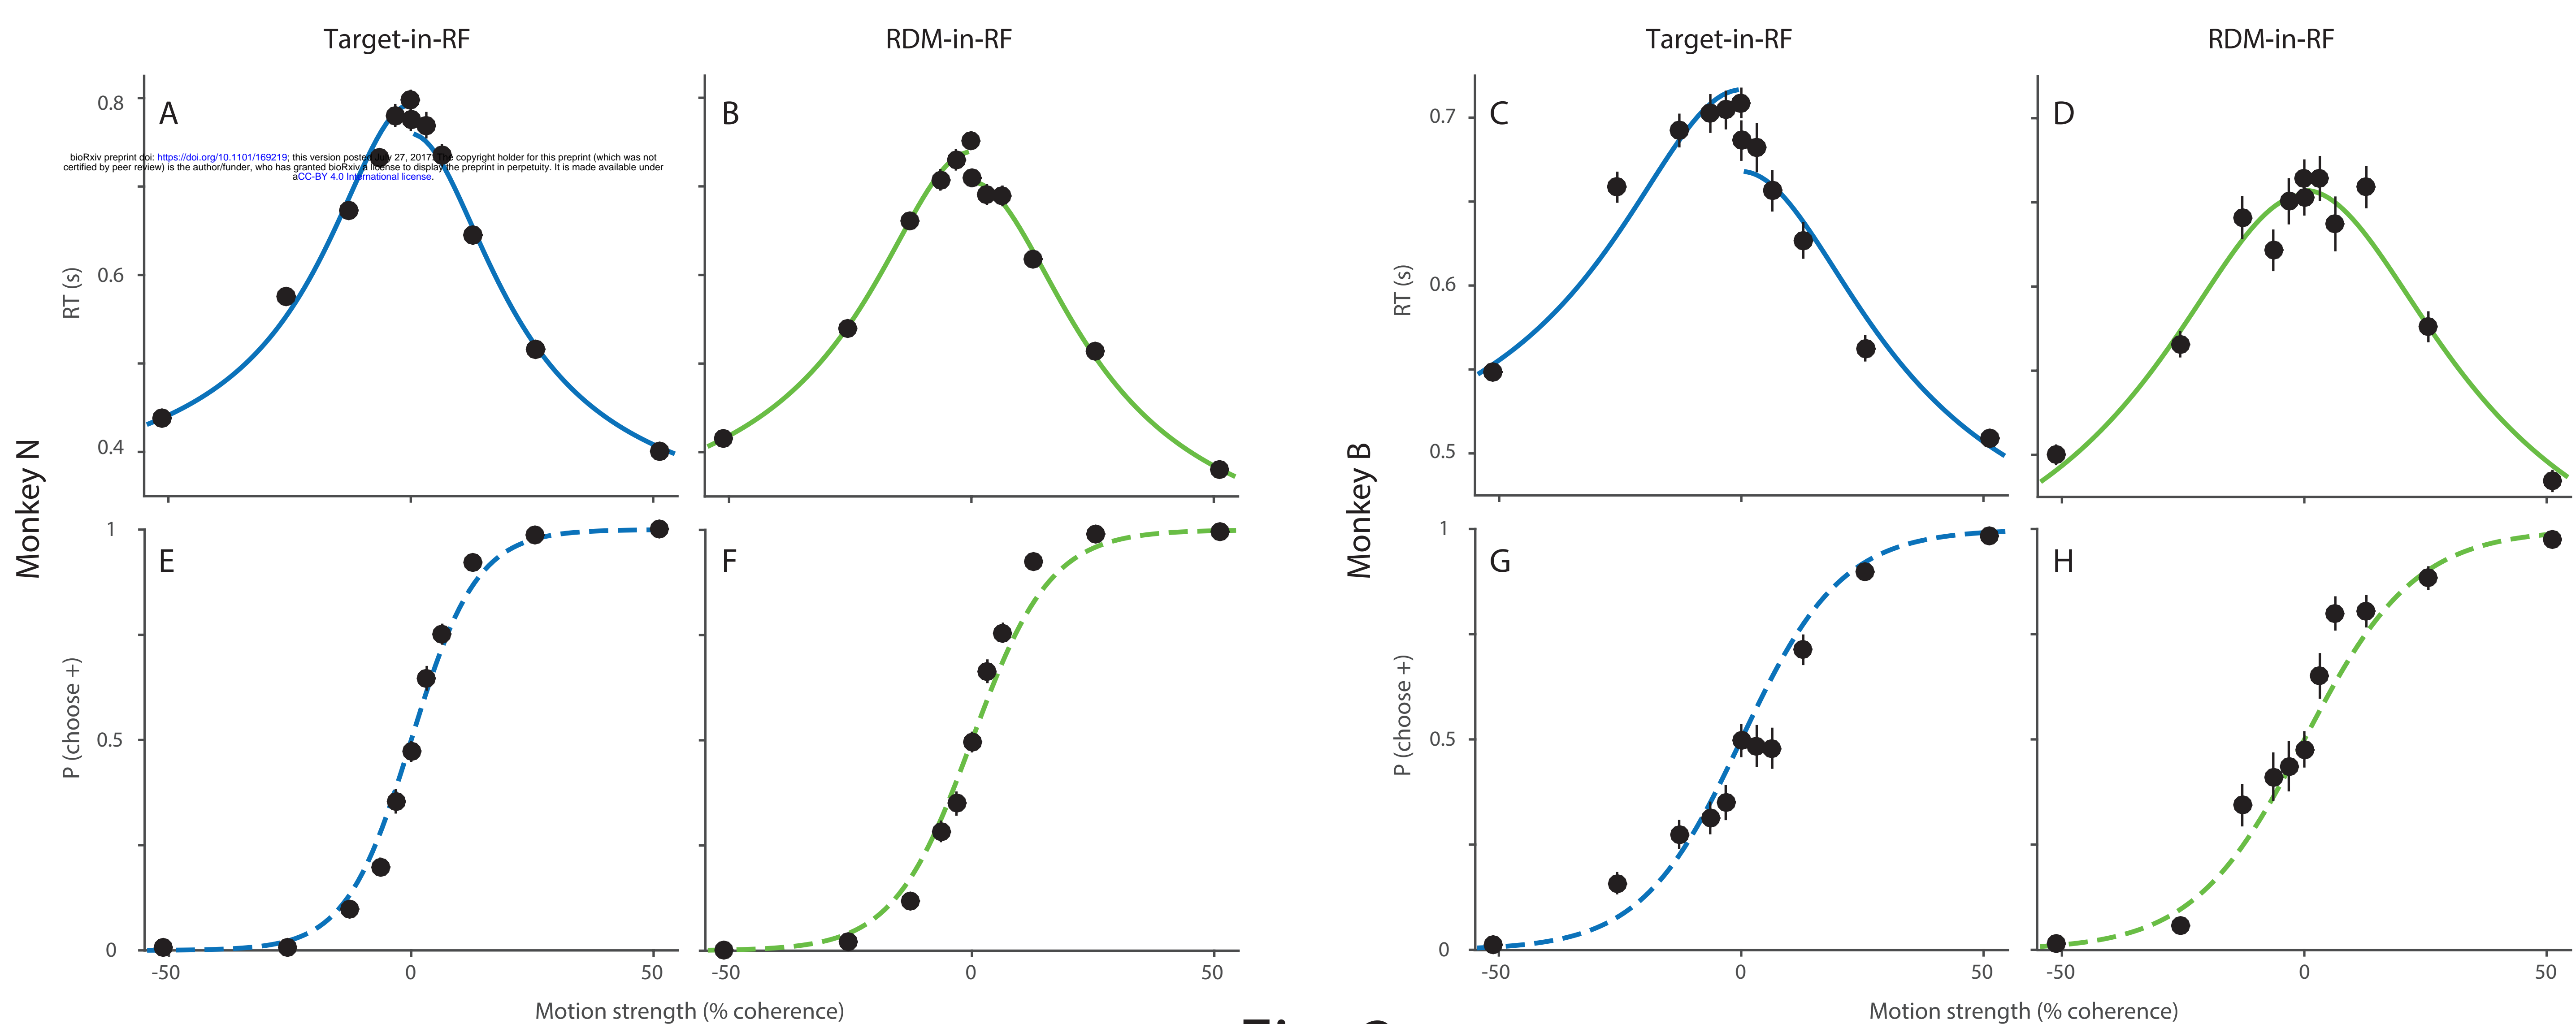

Fig. 2

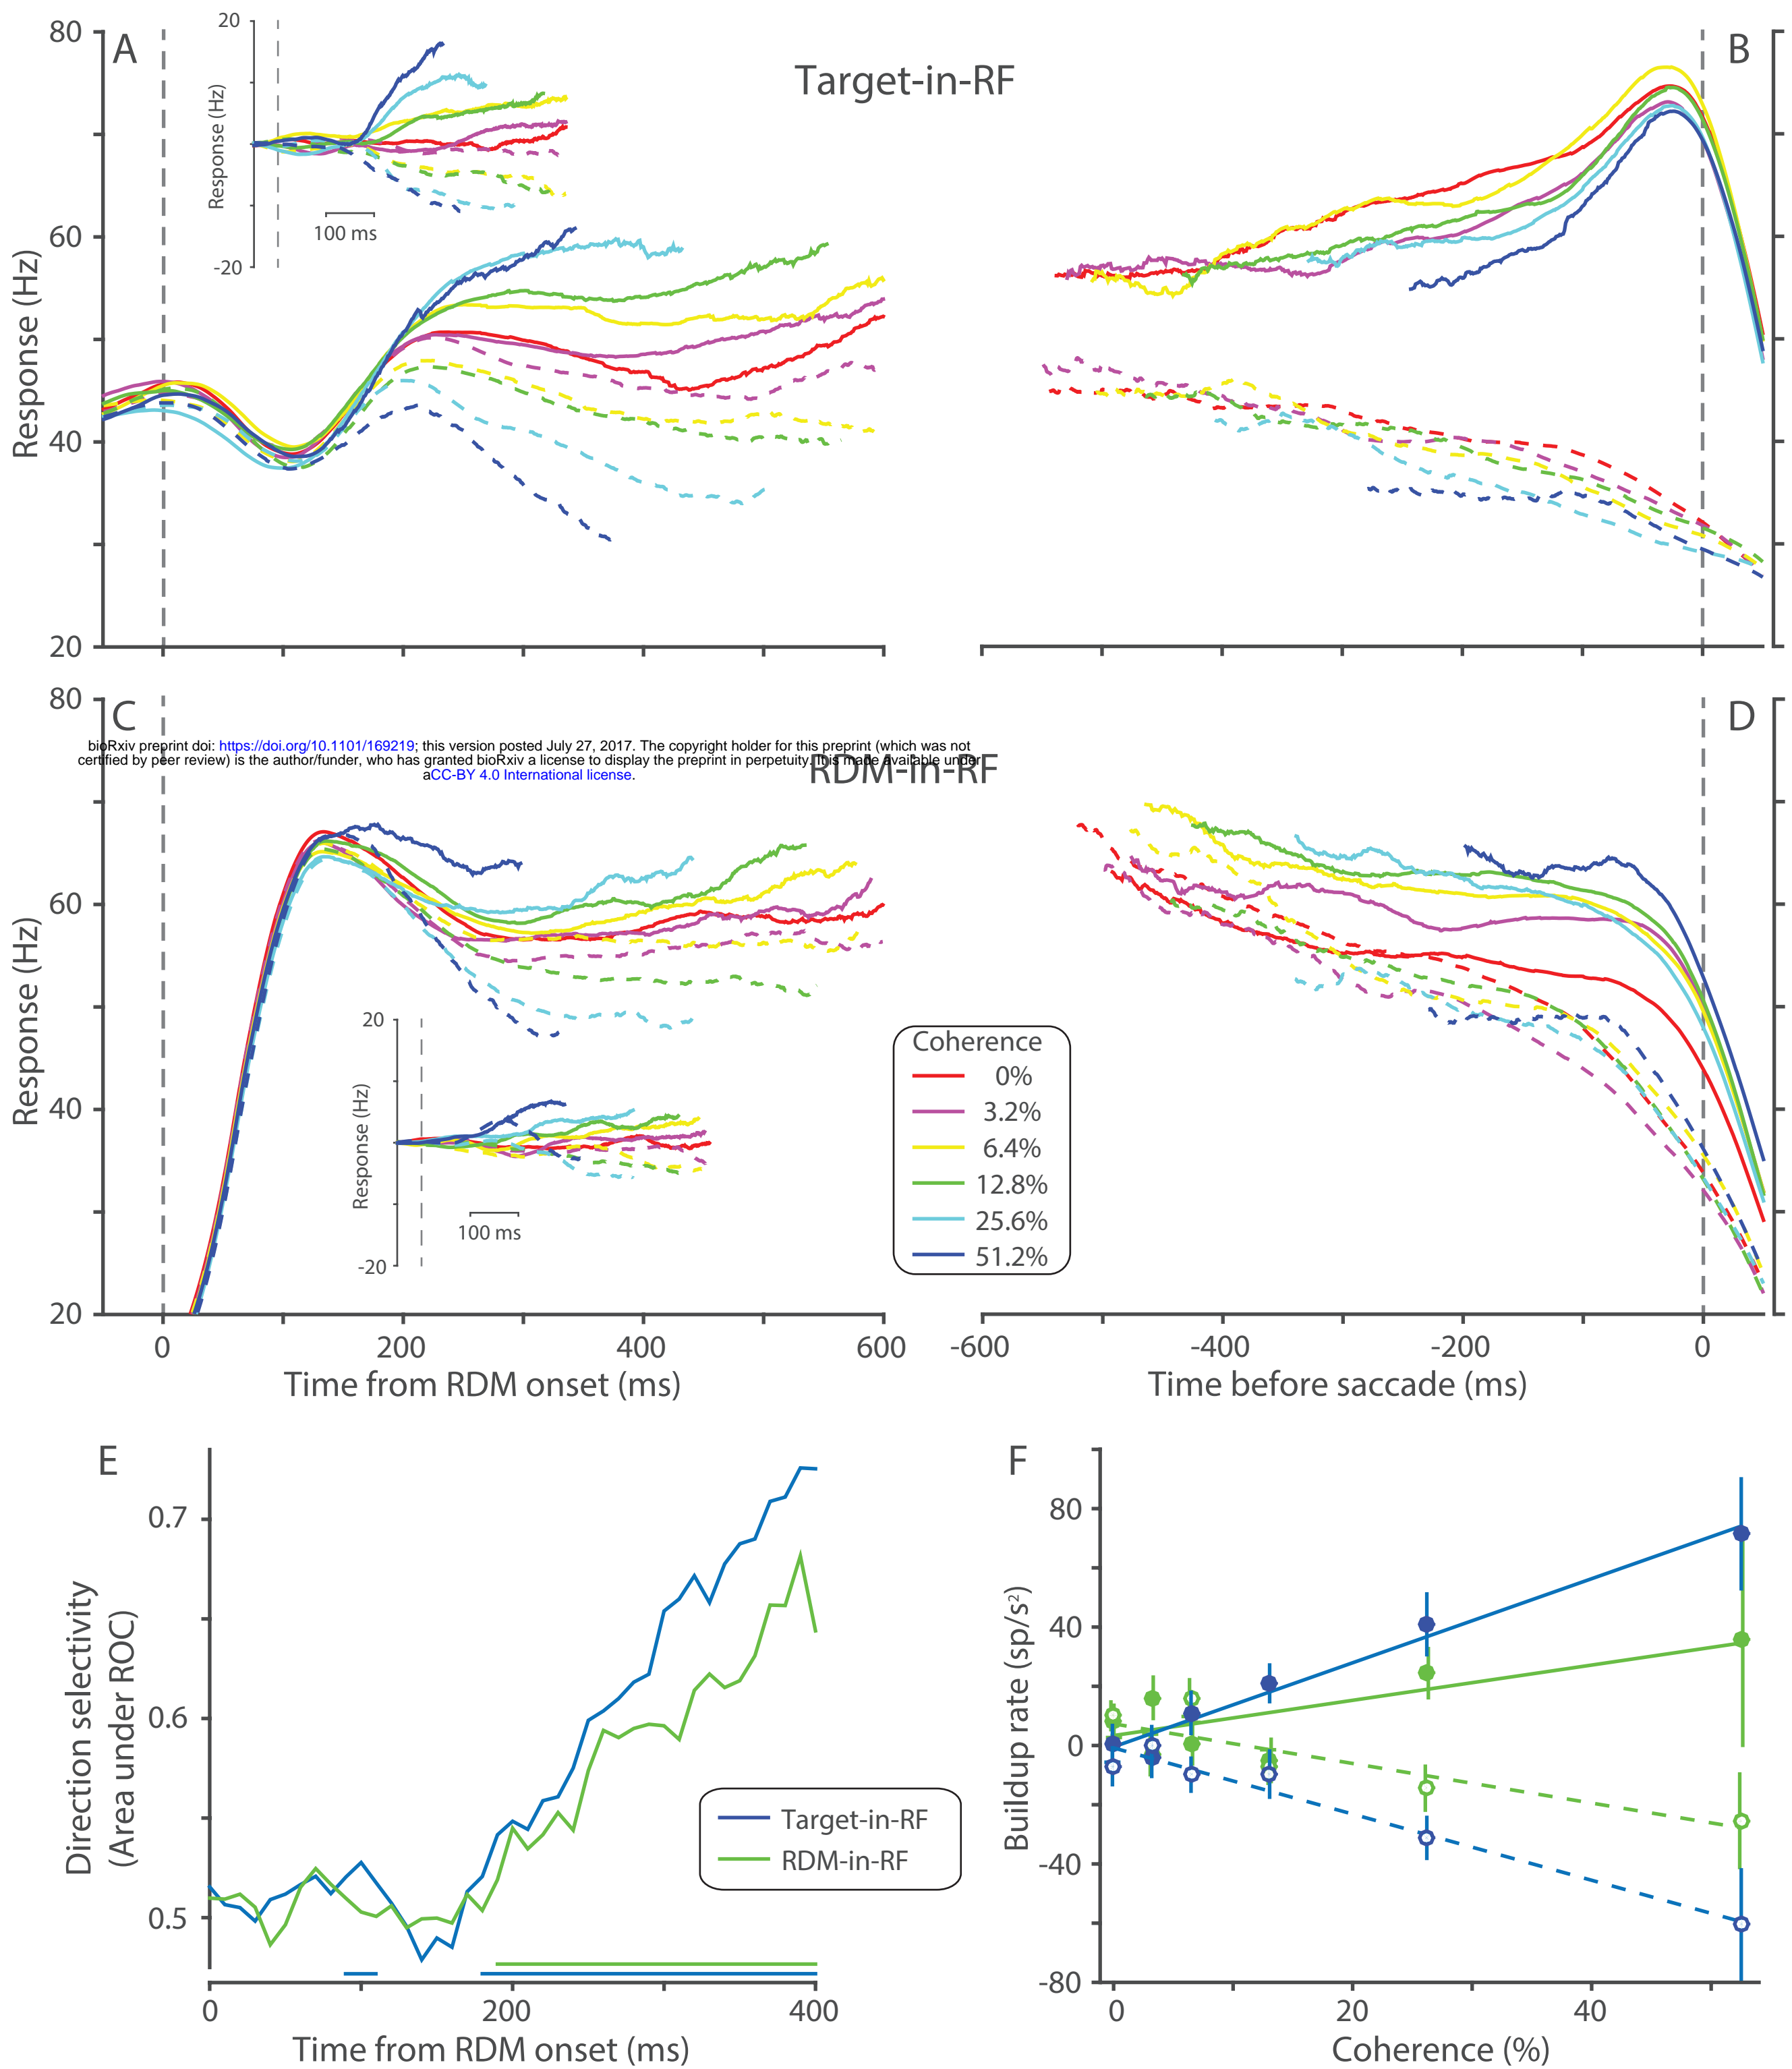

**Fig. 3**



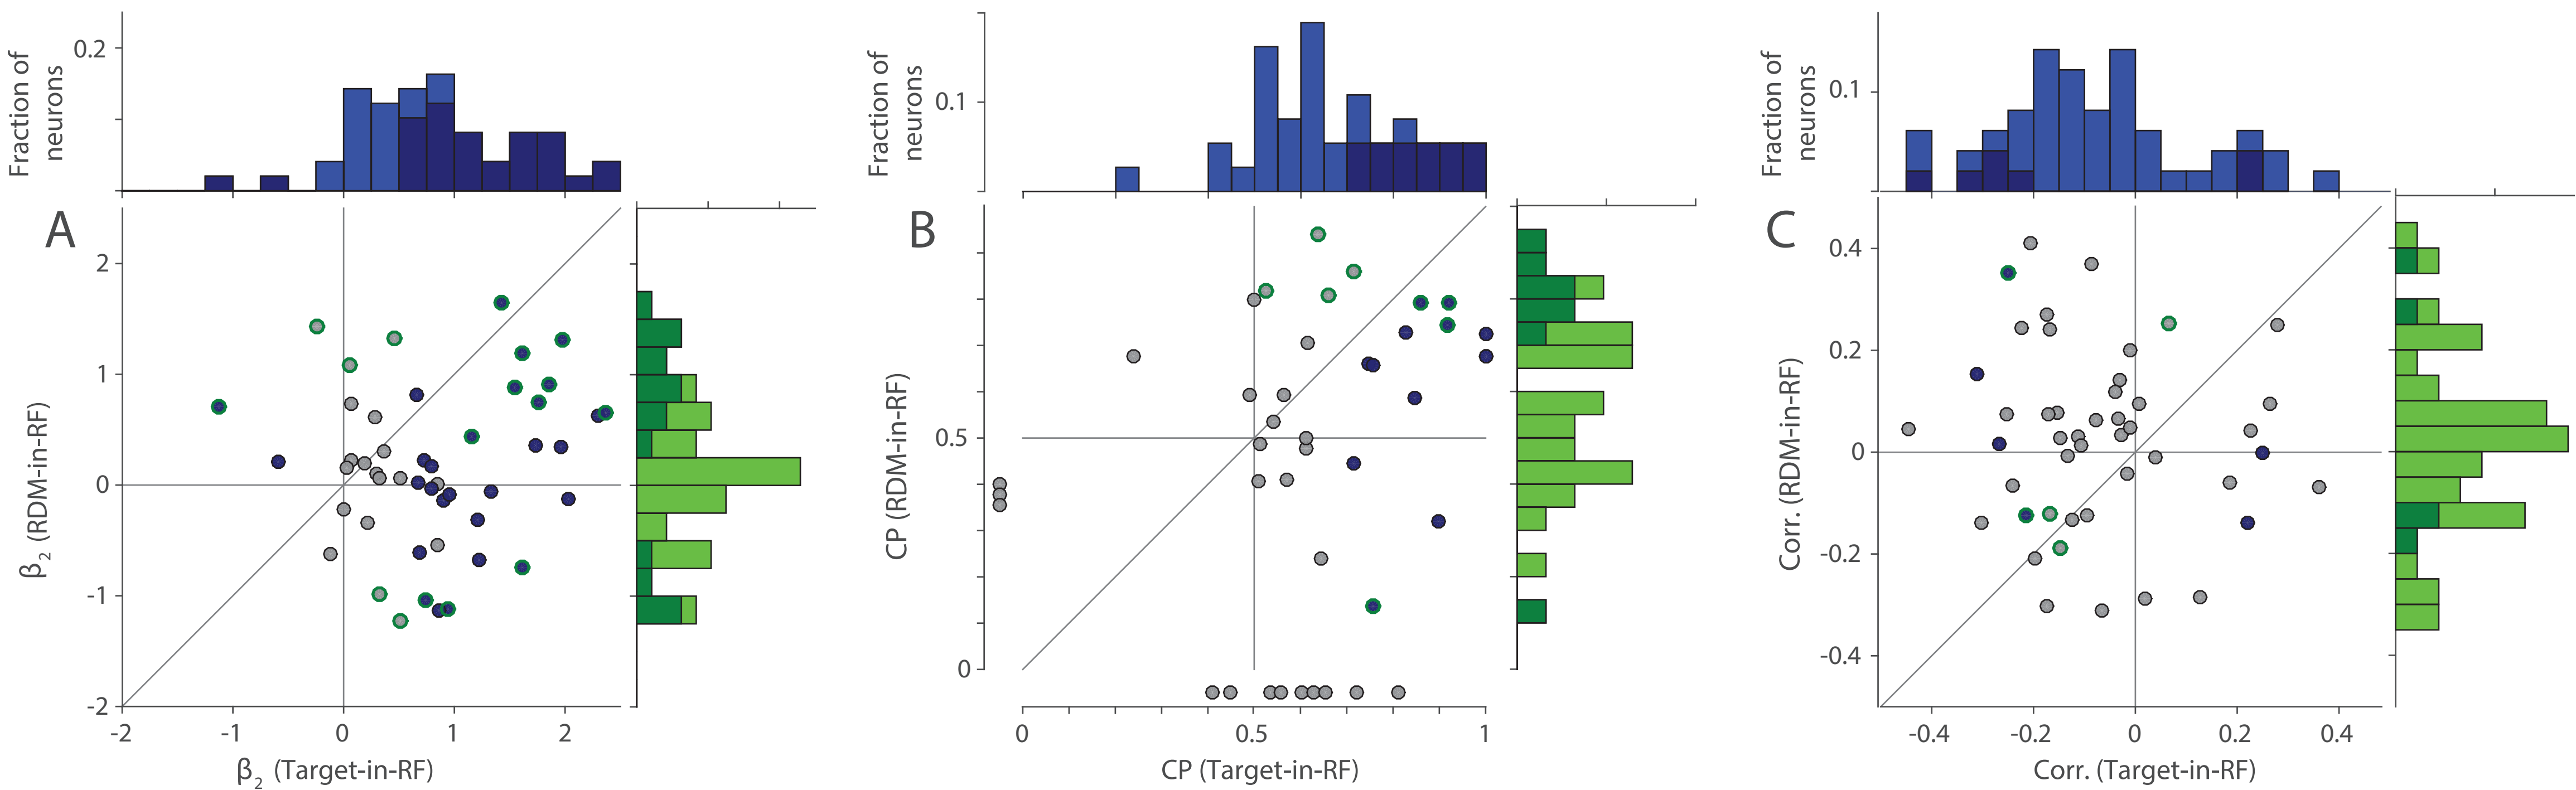

**Fig. 4**

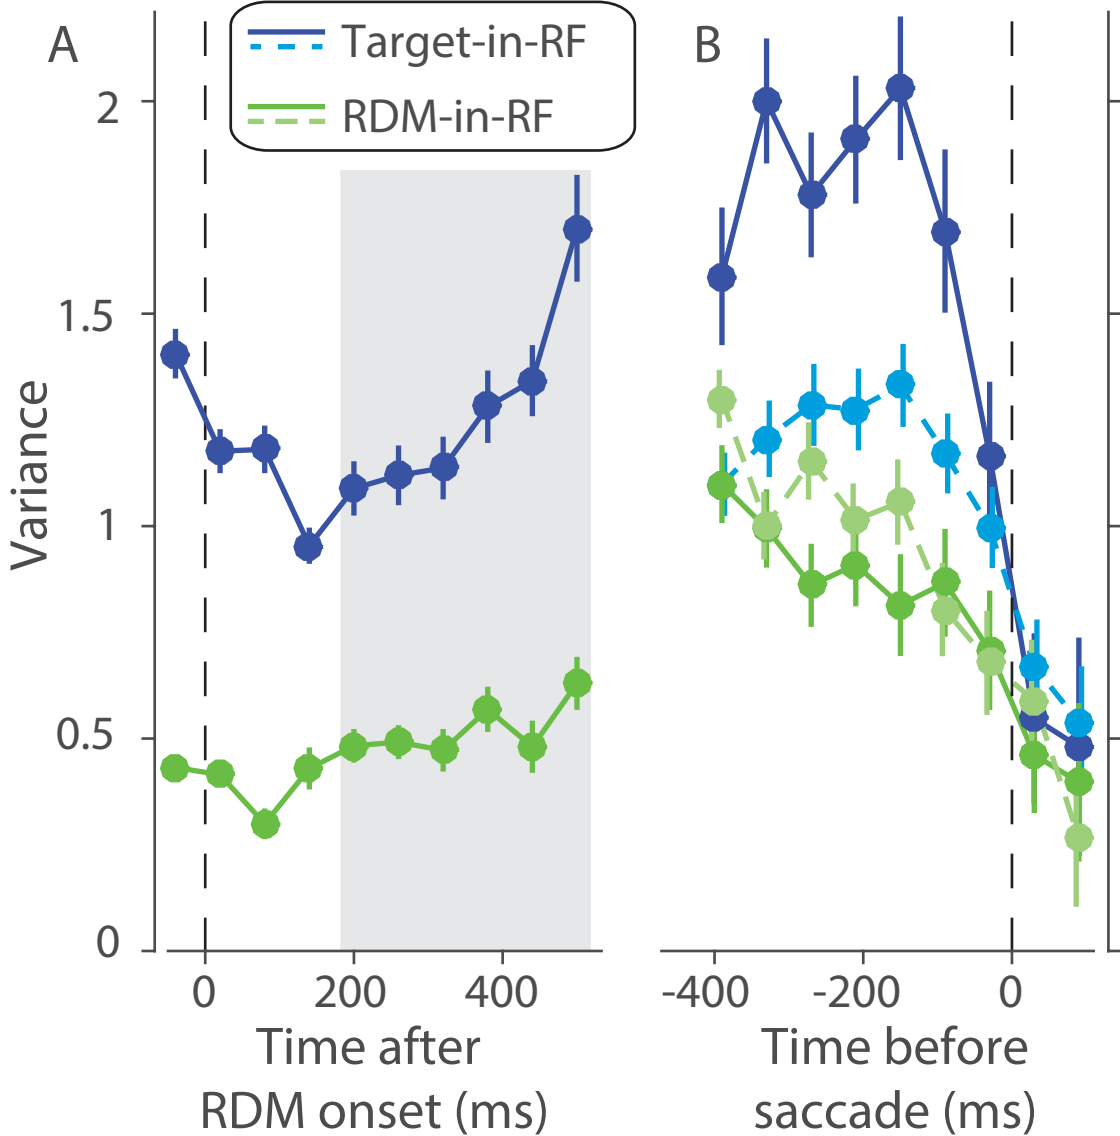

**Fig. 5**

**Fig. 6**

A

Theoretical  
autocorrelation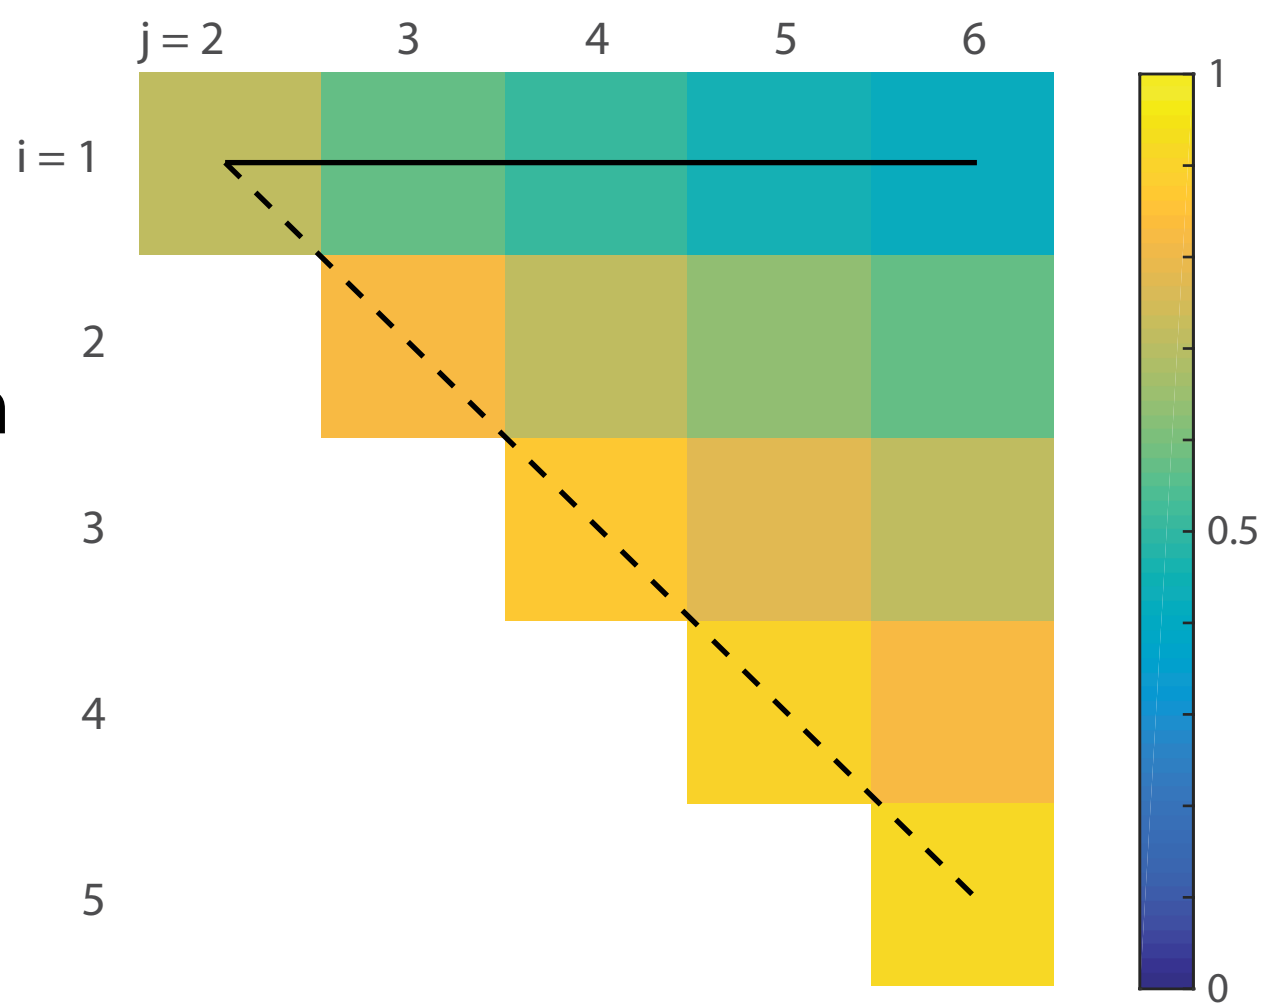

Target-in-RF

B

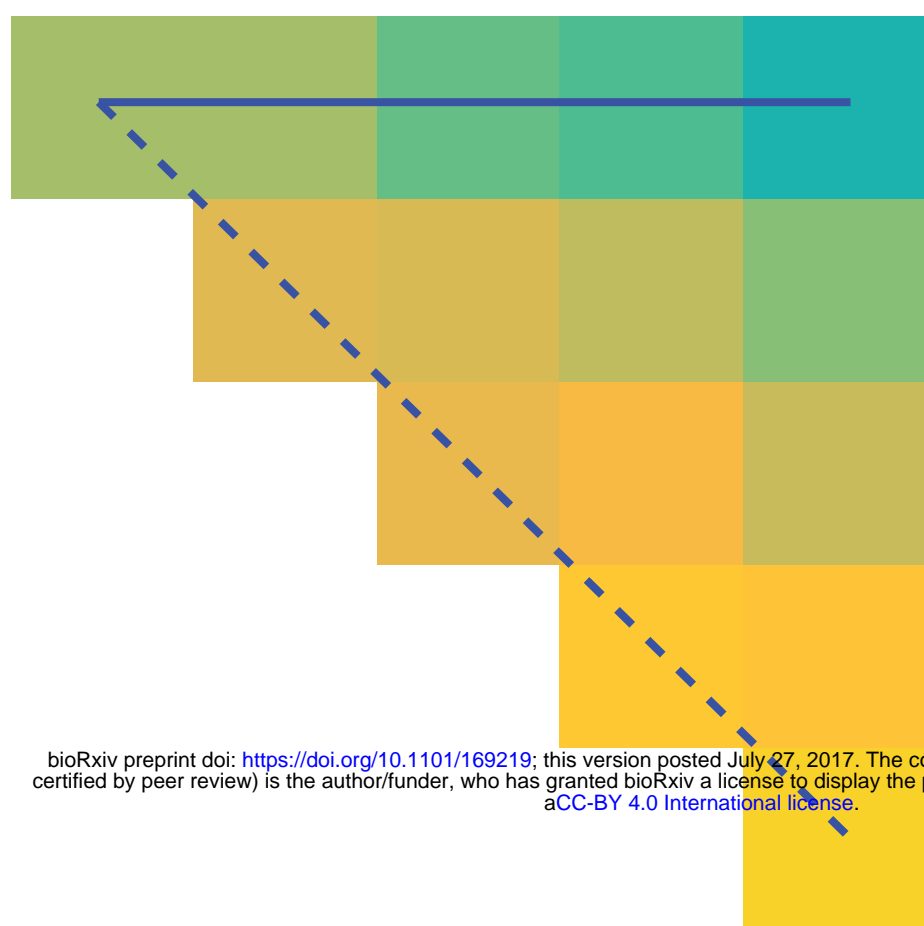

RDM-in-RF

C

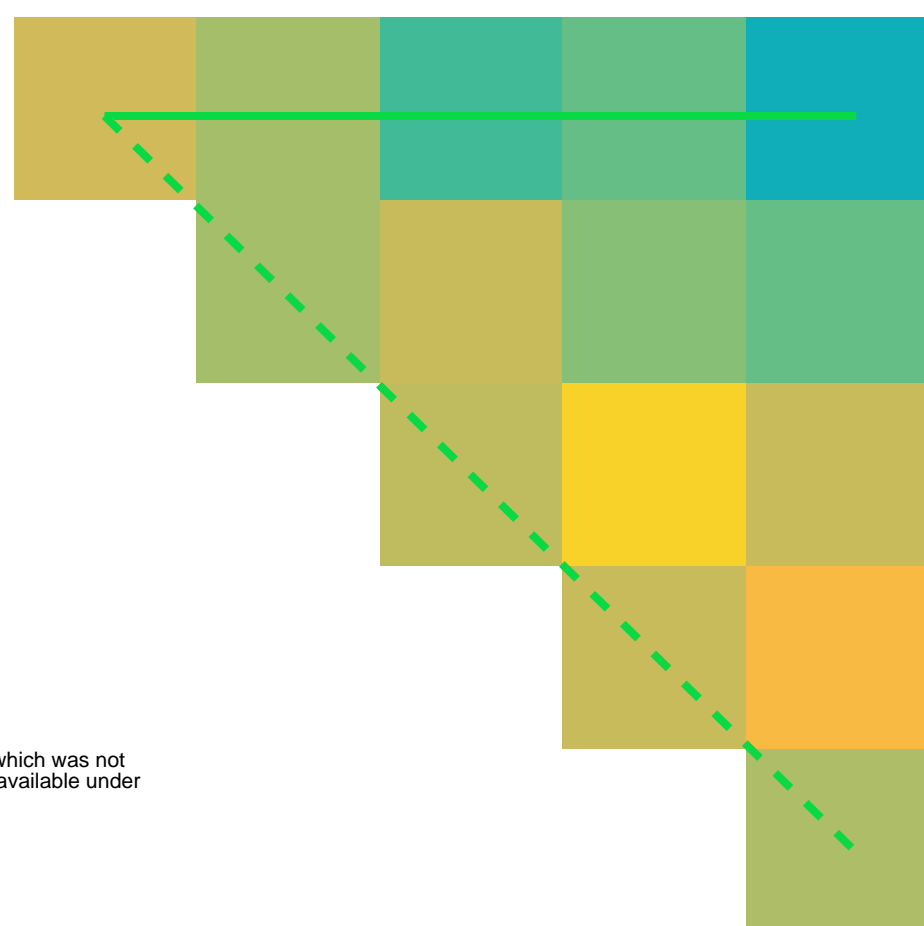

bioRxiv preprint doi: <https://doi.org/10.1101/169219>; this version posted July 27, 2017. The copyright holder for this preprint (which was not certified by peer review) is the author/funder, who has granted bioRxiv a license to display the preprint in perpetuity. It is made available under aCC-BY 4.0 International license.

D

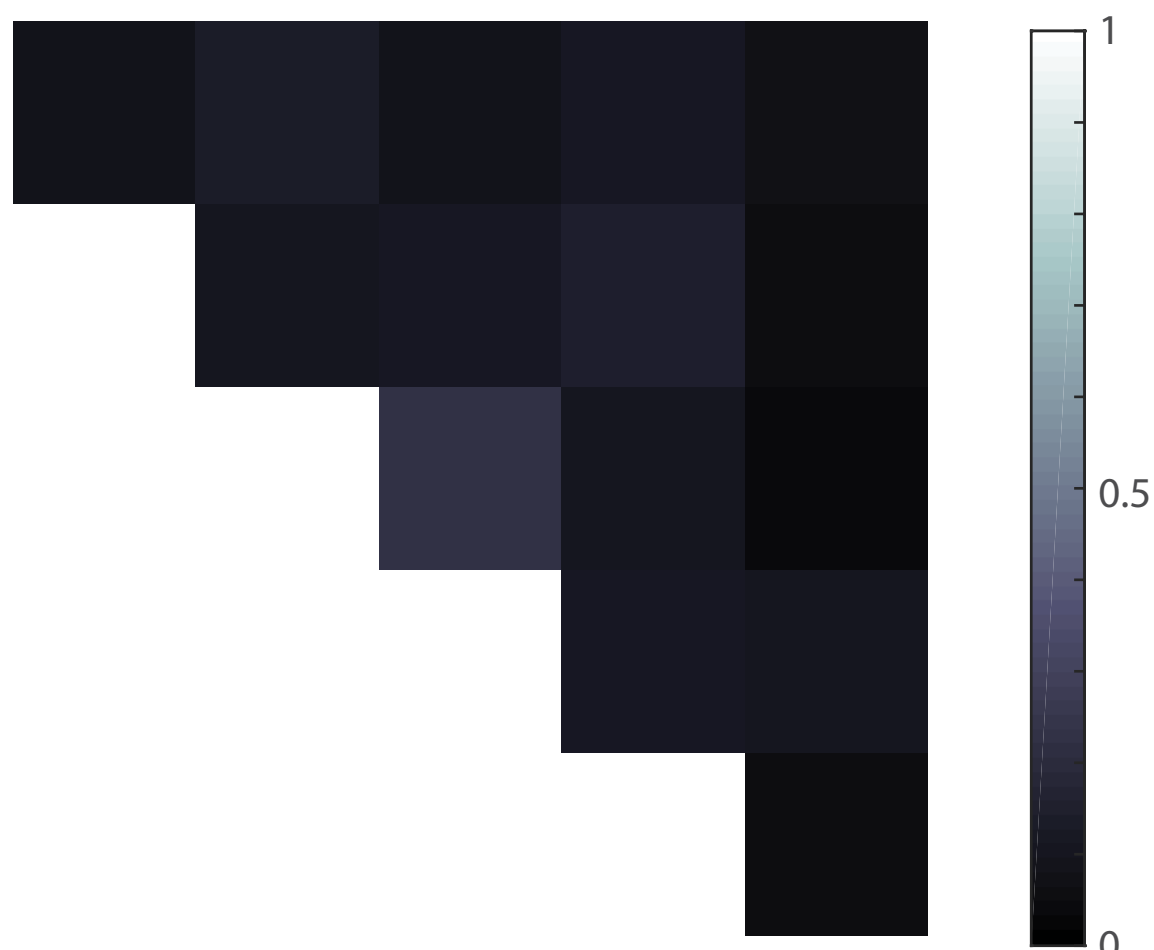

E

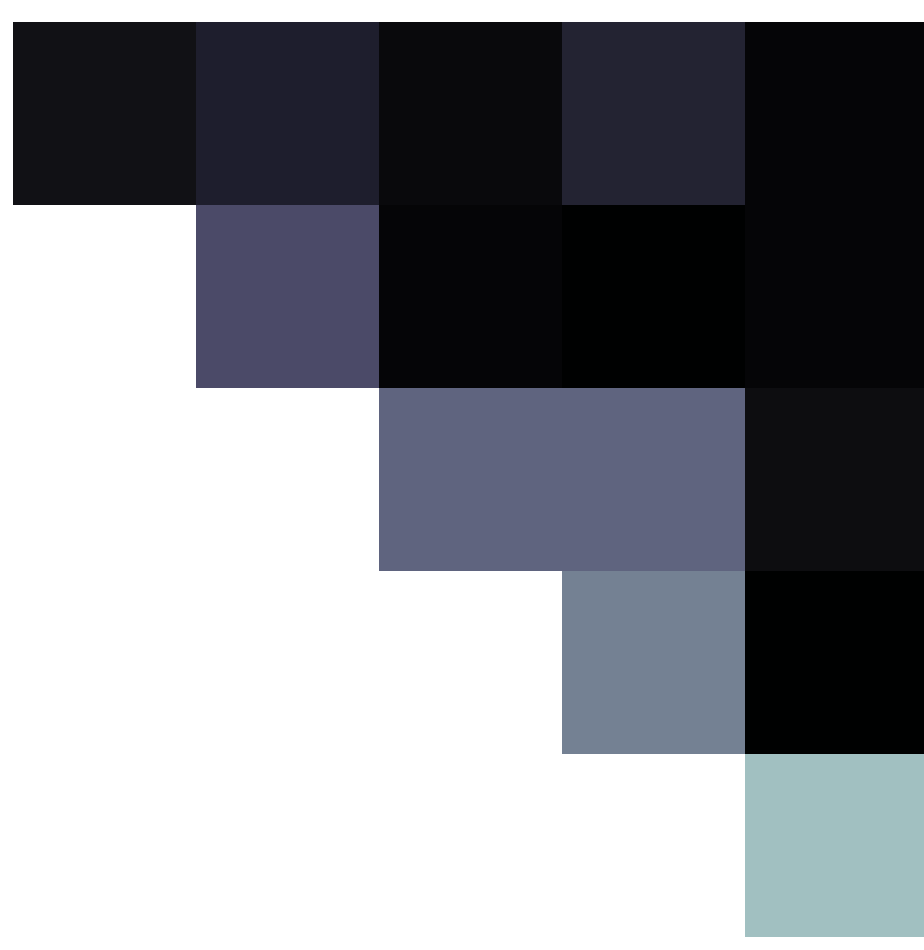

F

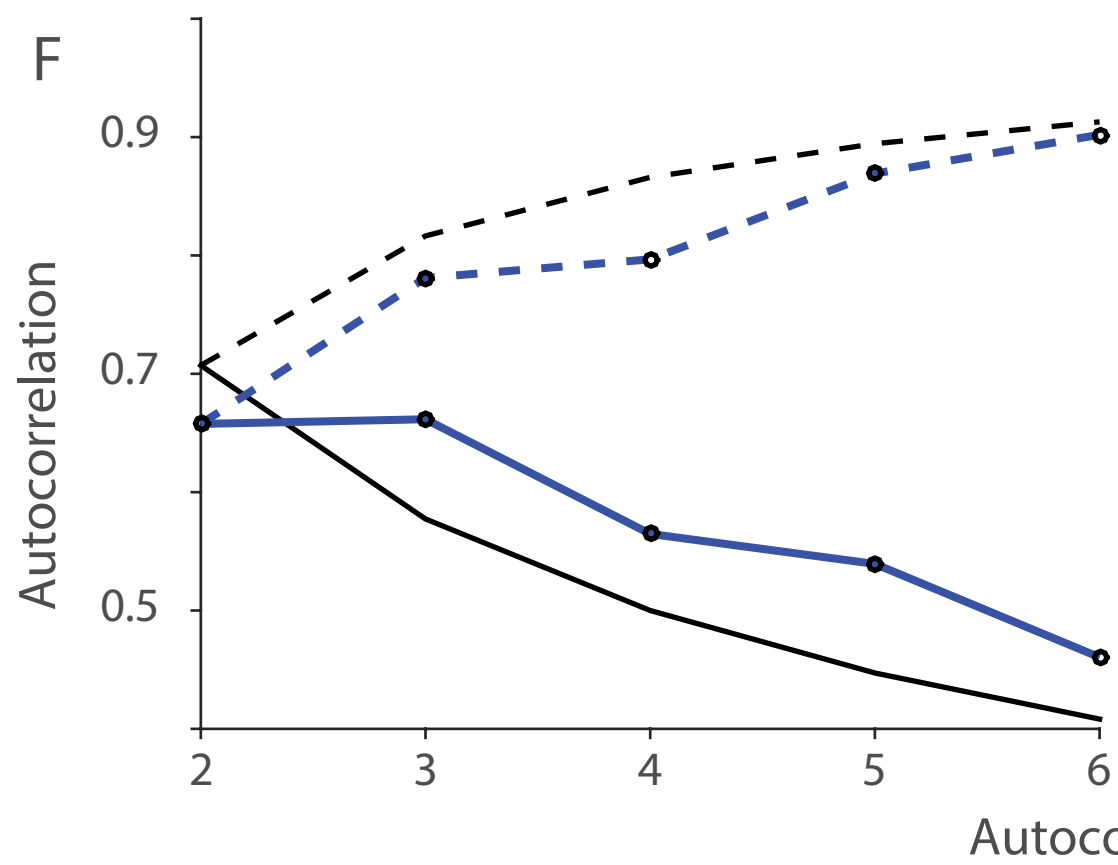

G

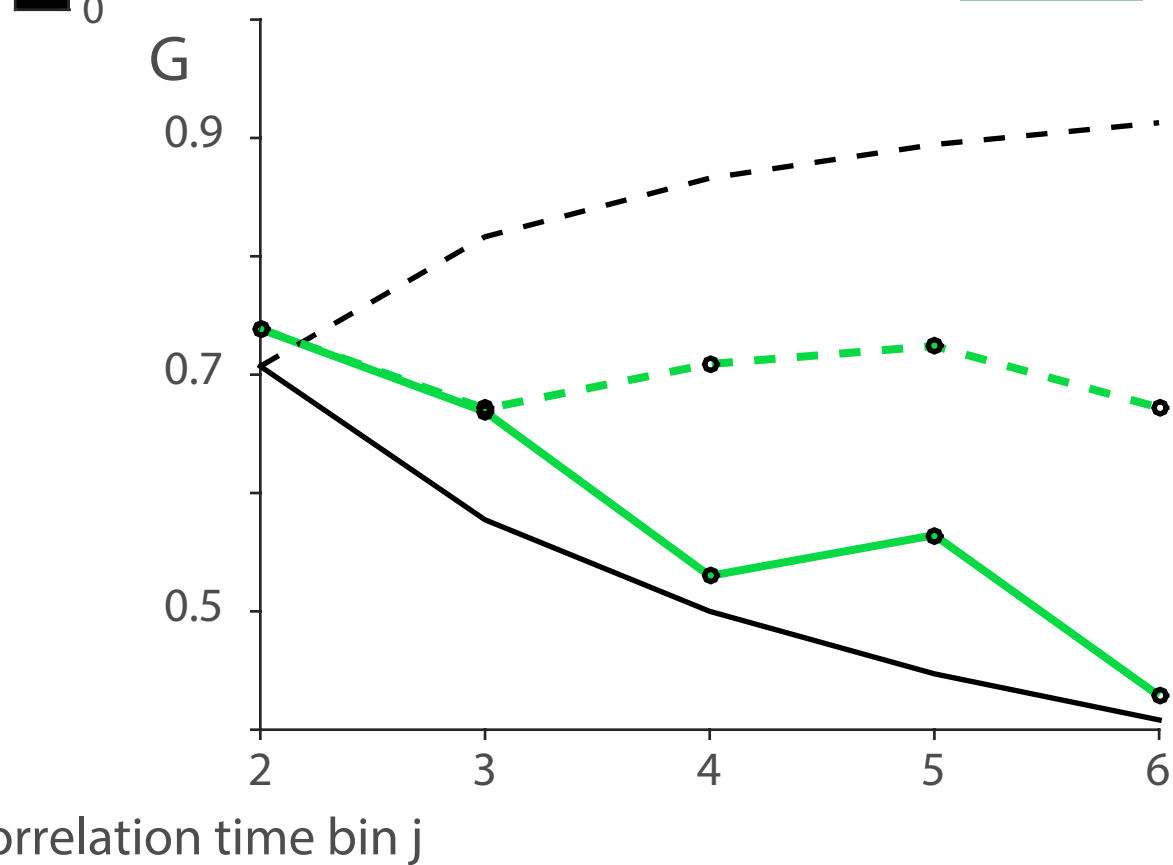

**Fig. 7**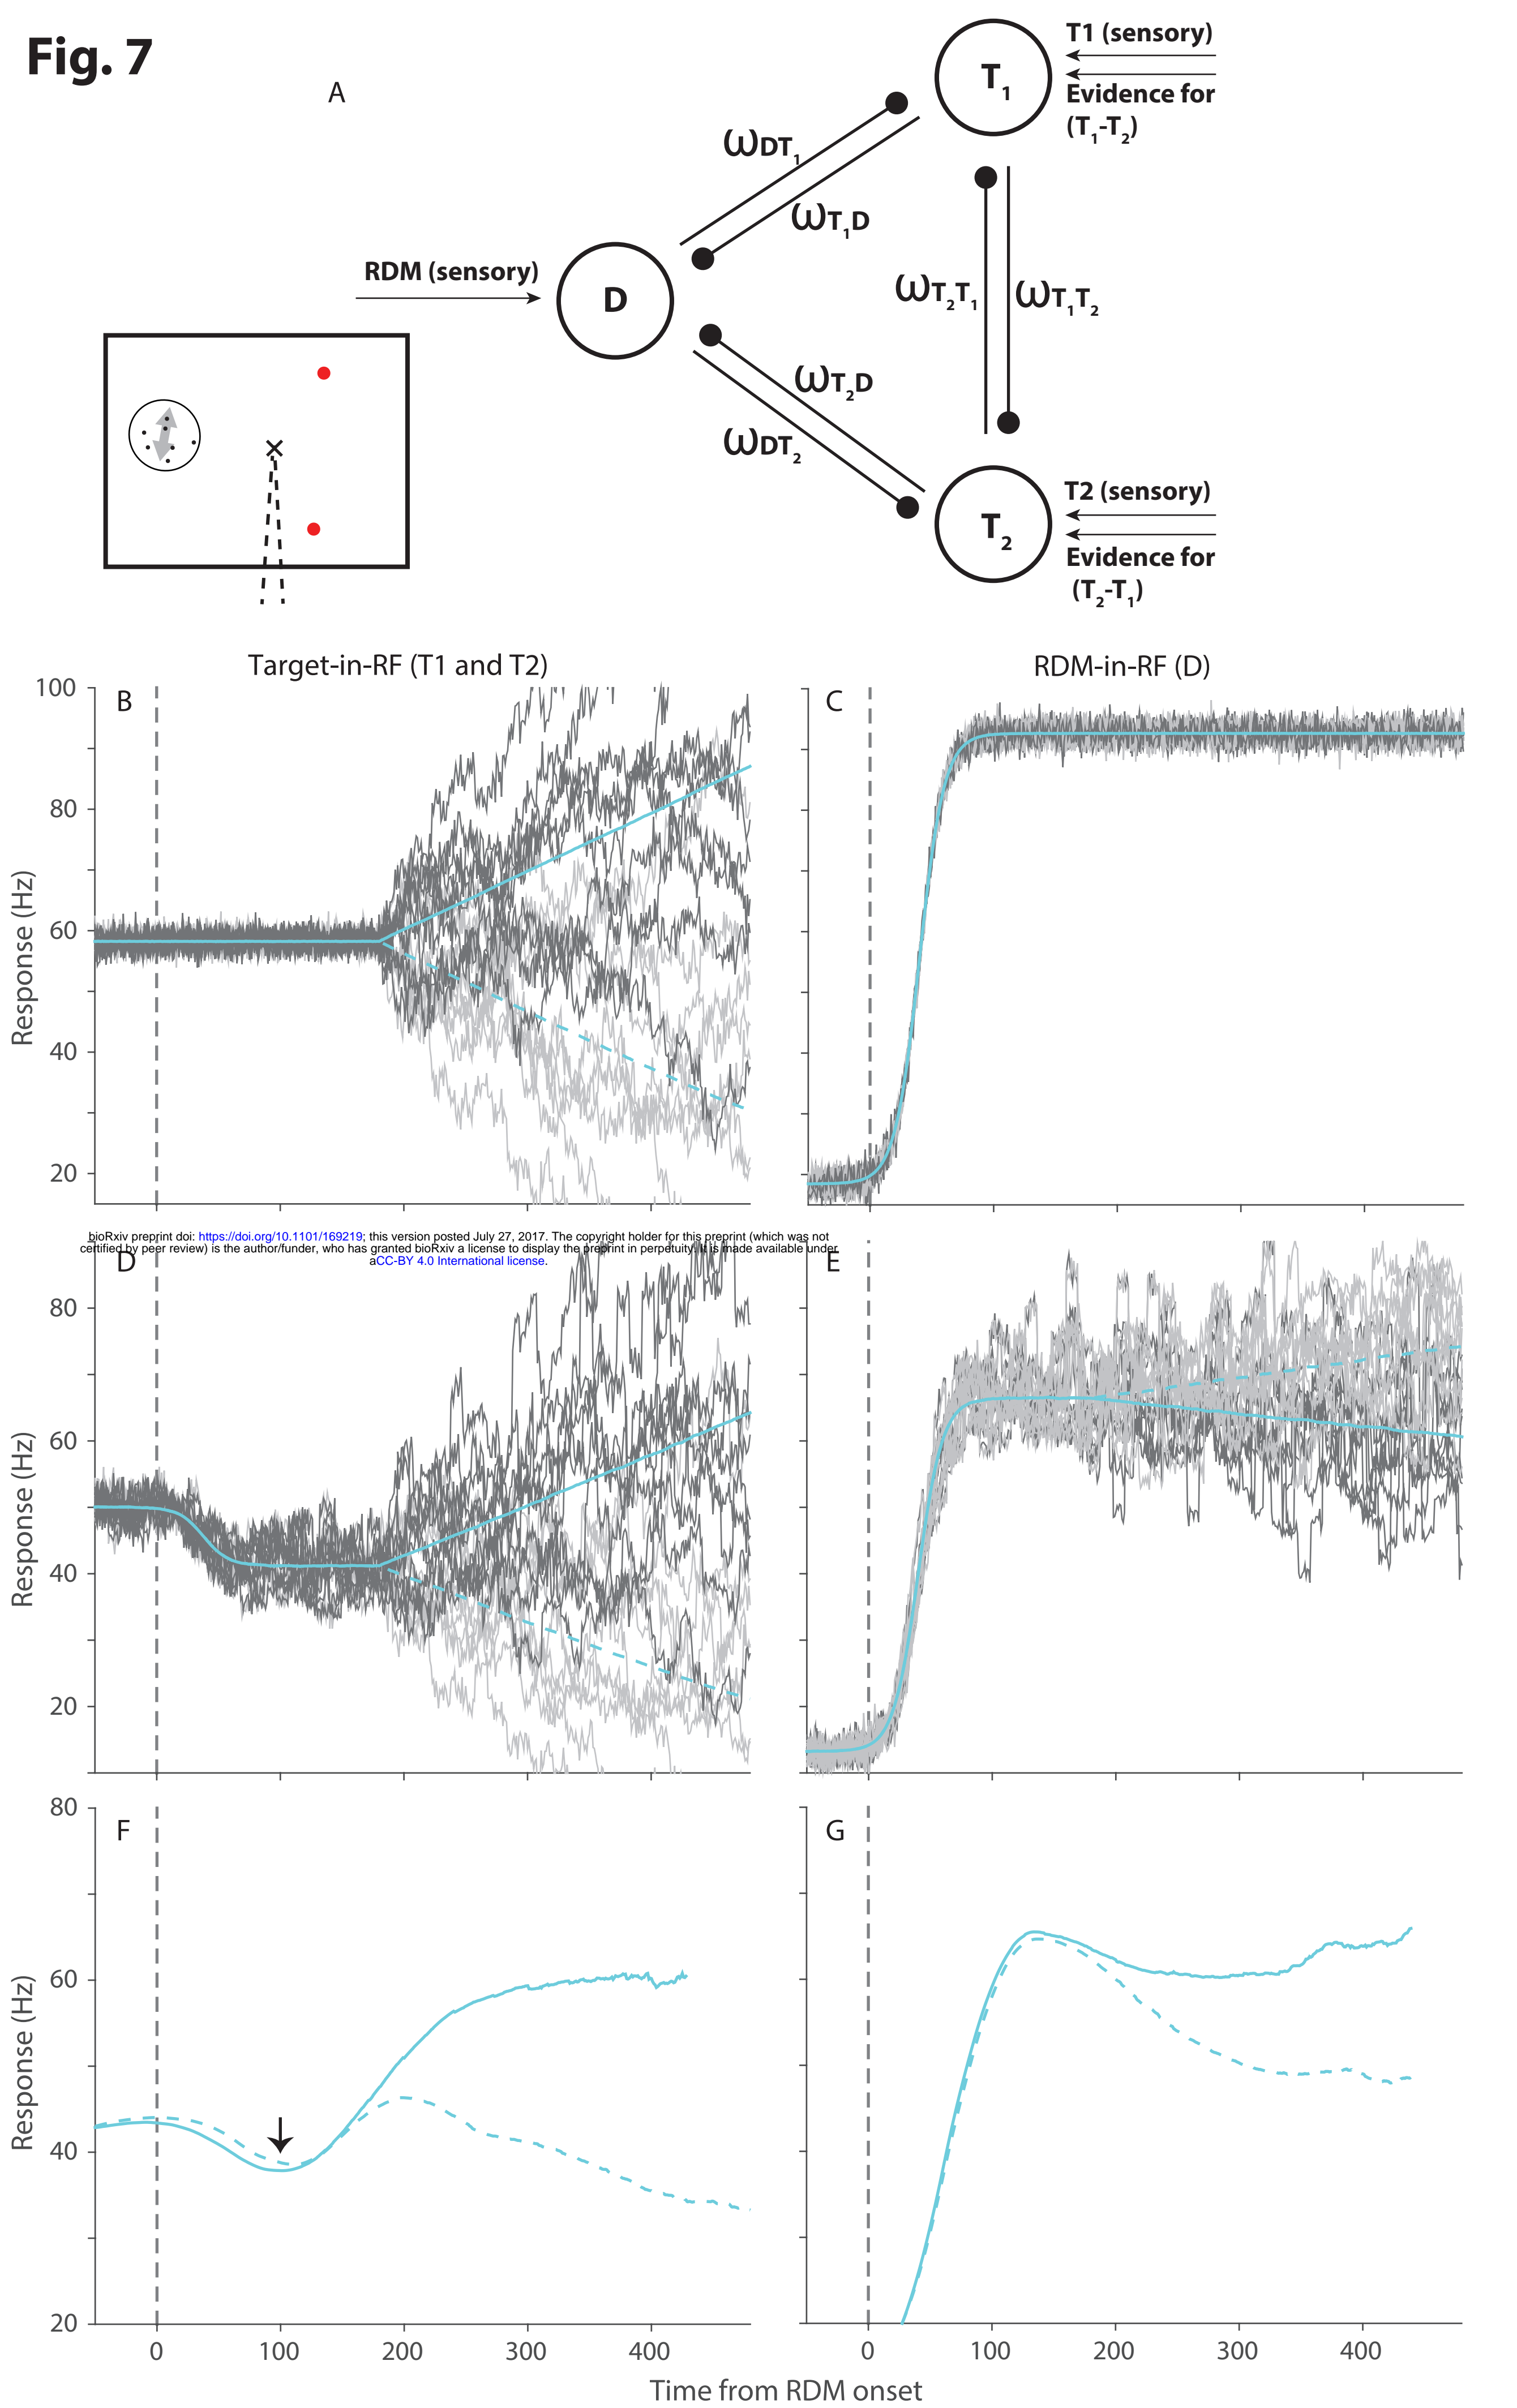

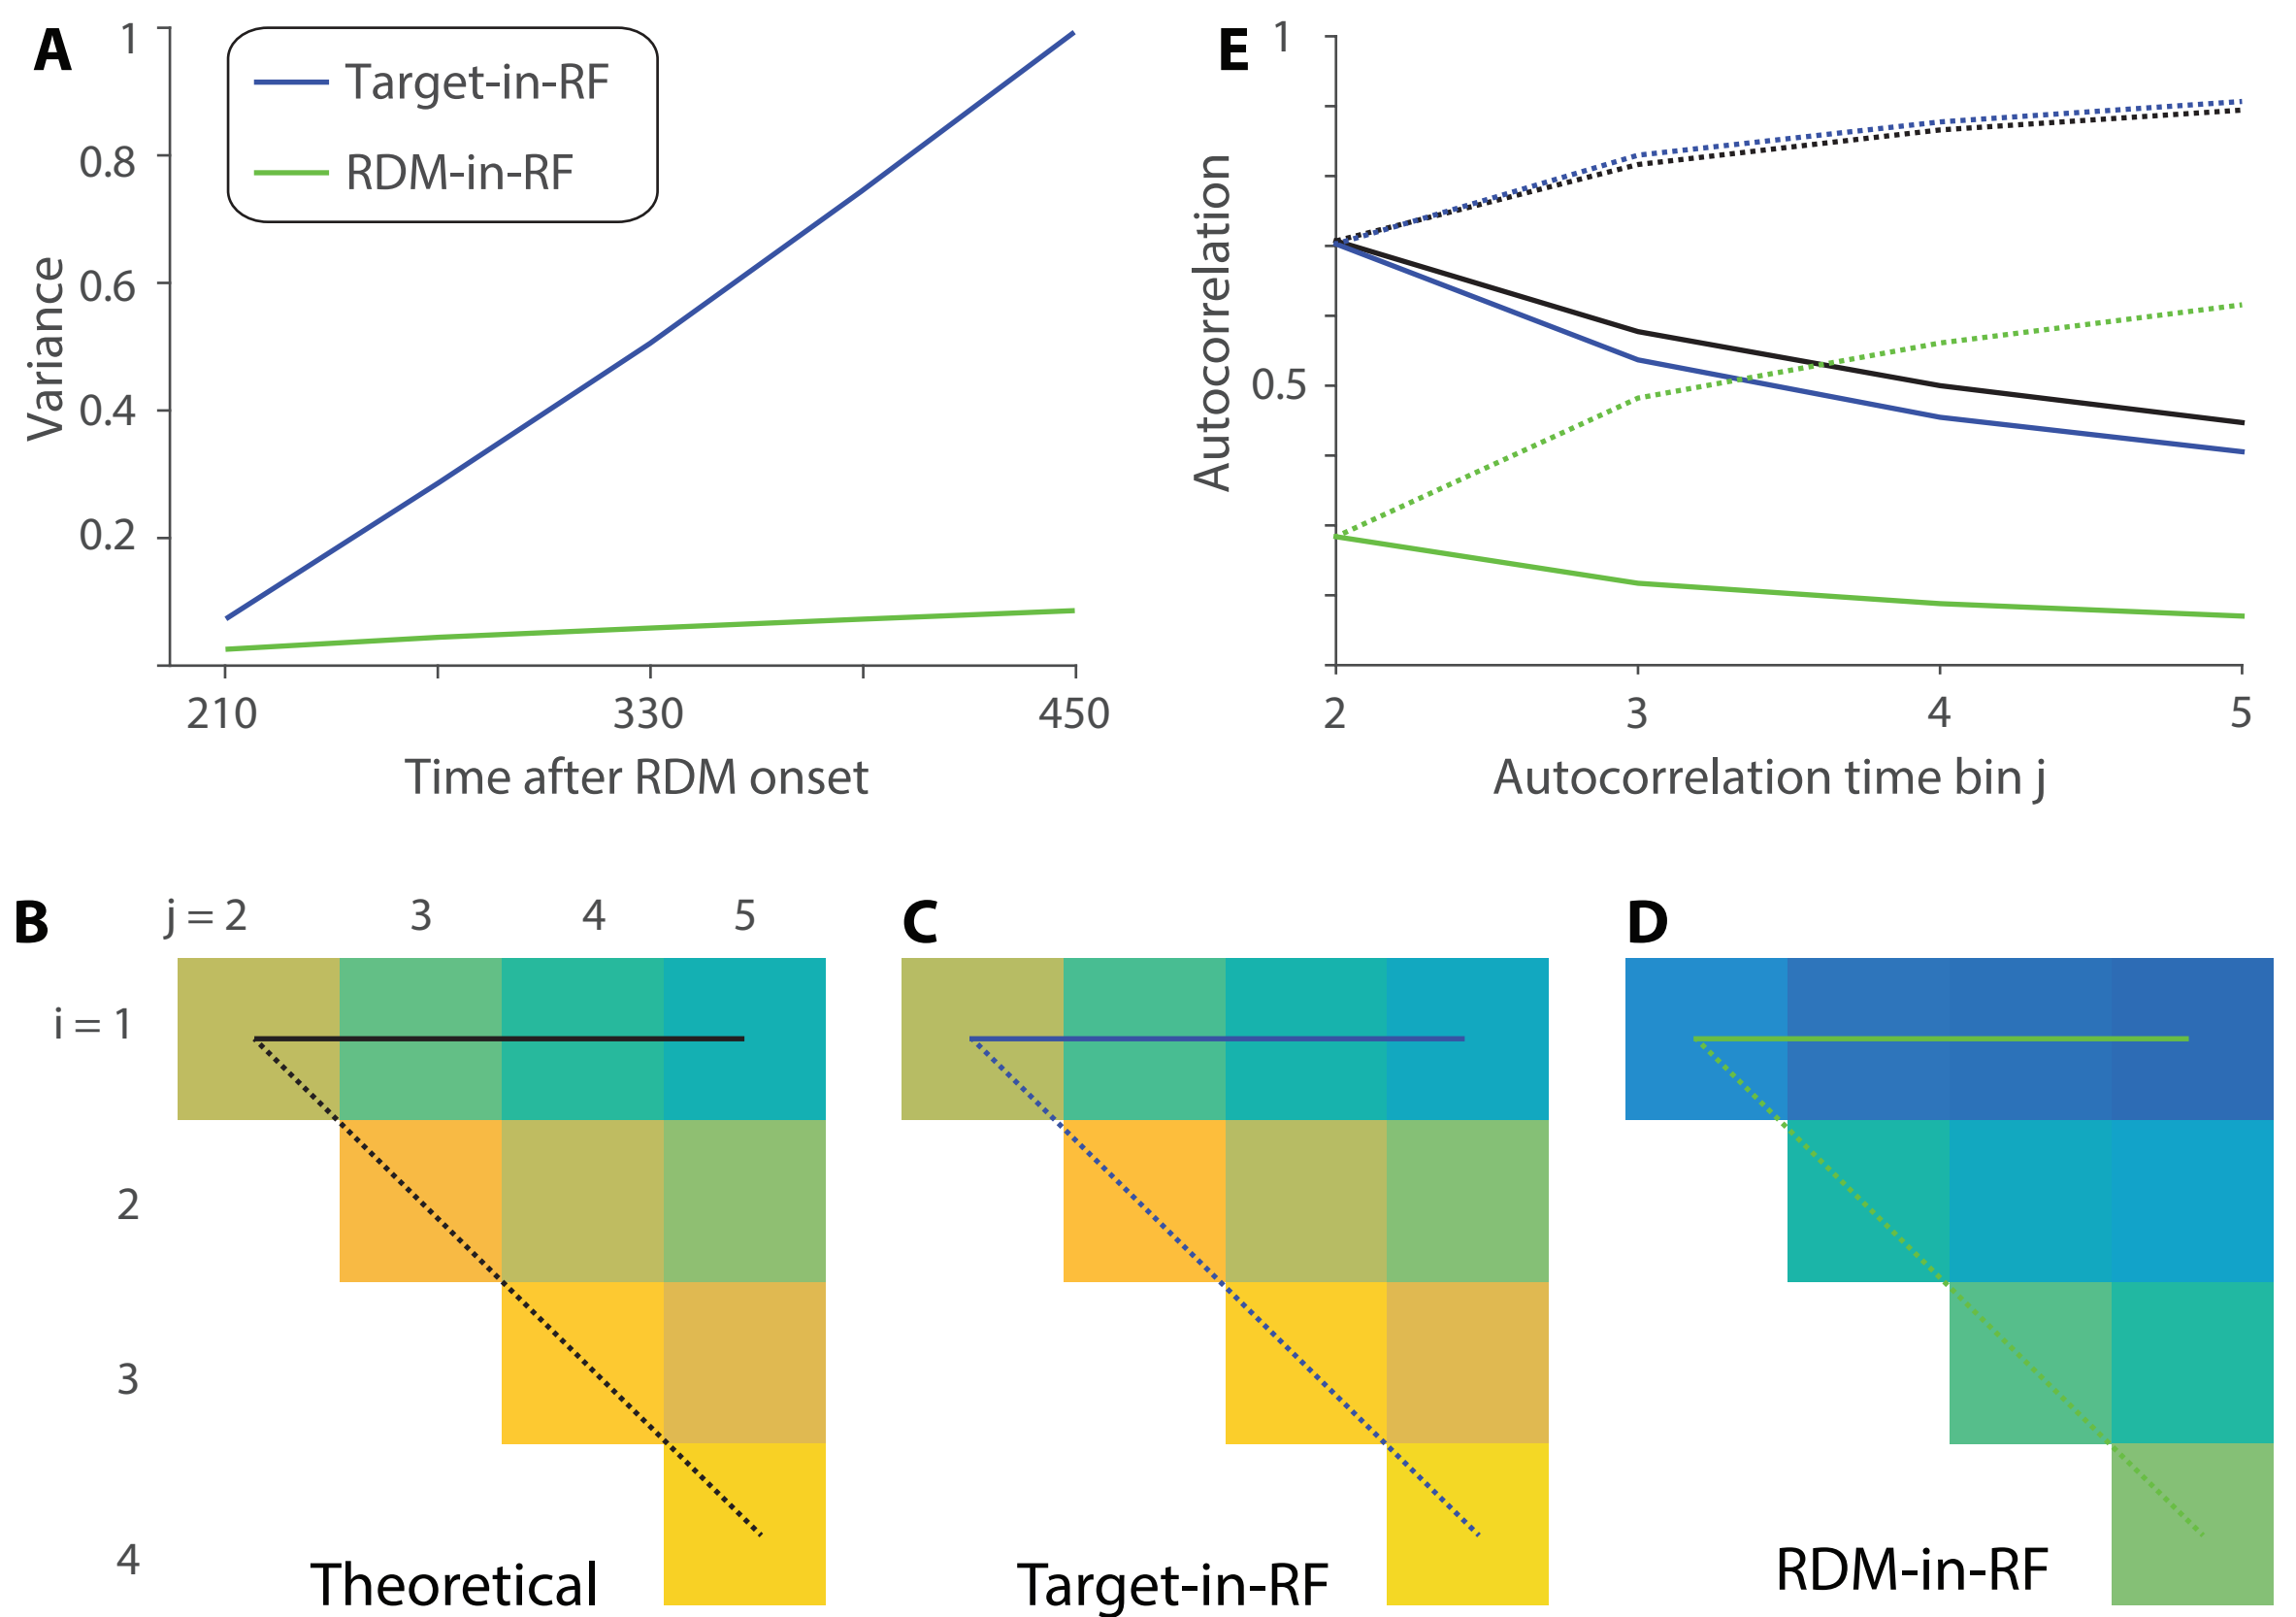

**Fig. 8**



# FIG S1

## Monkey N

## Monkey B

Target-in-RF

bioRxiv preprint doi: <https://doi.org/10.1101/169219>; this version posted July 27, 2017. The copyright holder for this preprint (which was not certified by peer review) is the author/funder, who has granted bioRxiv a license to display the preprint in perpetuity. It is made available under aCC-BY 4.0 International license.

Log-likelihood ratio of predictions

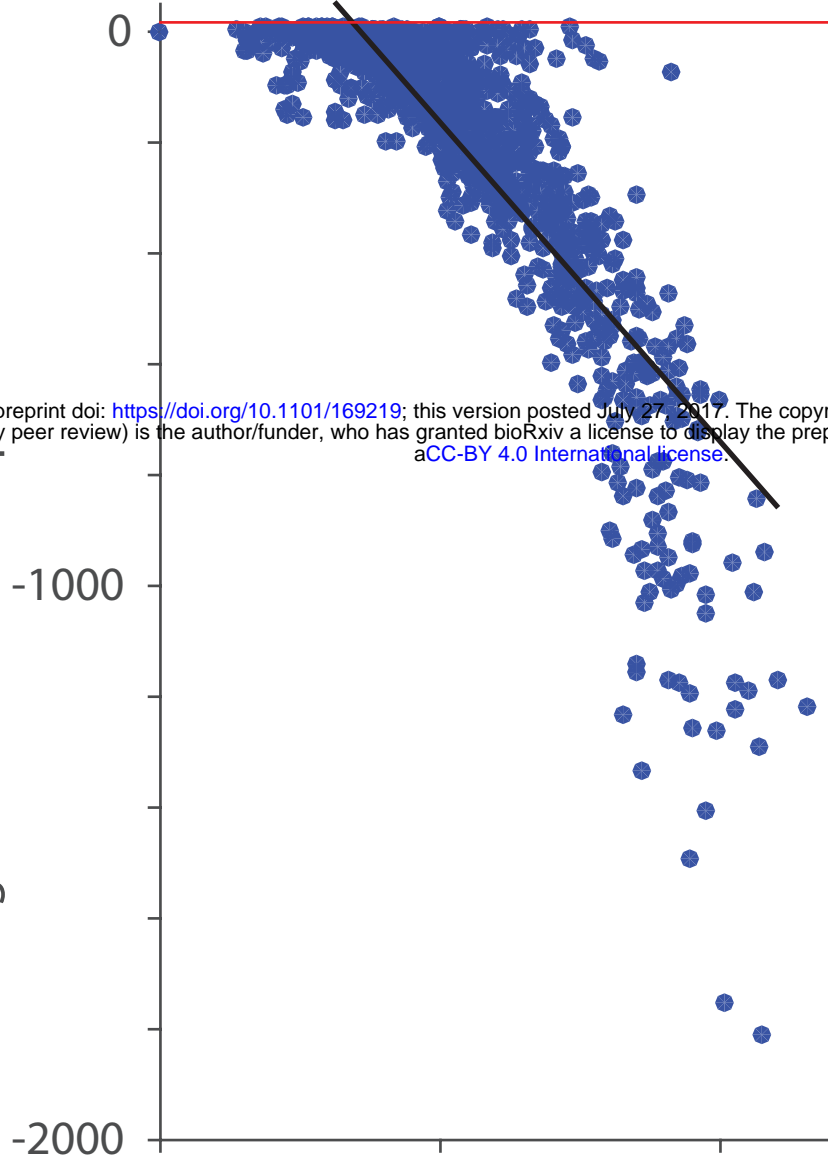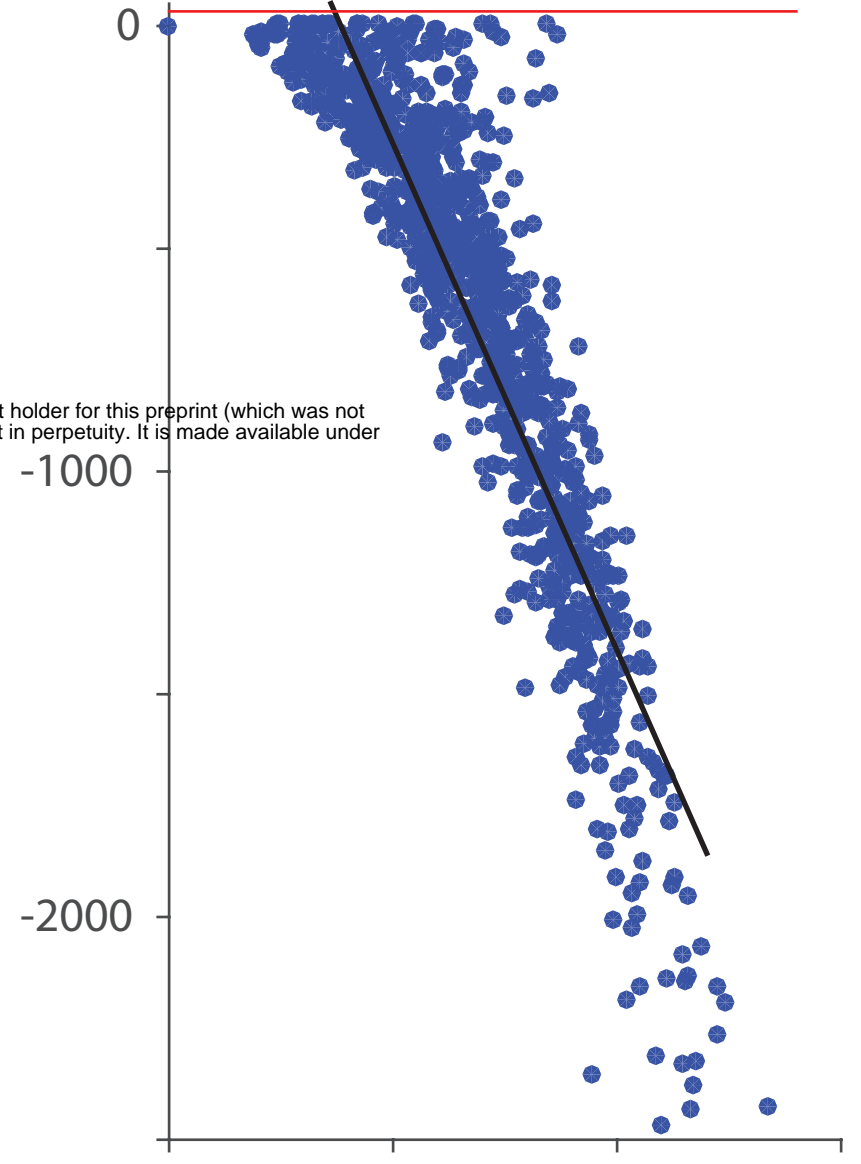

RDM-in-RF

Log-likelihood ratio of predictions

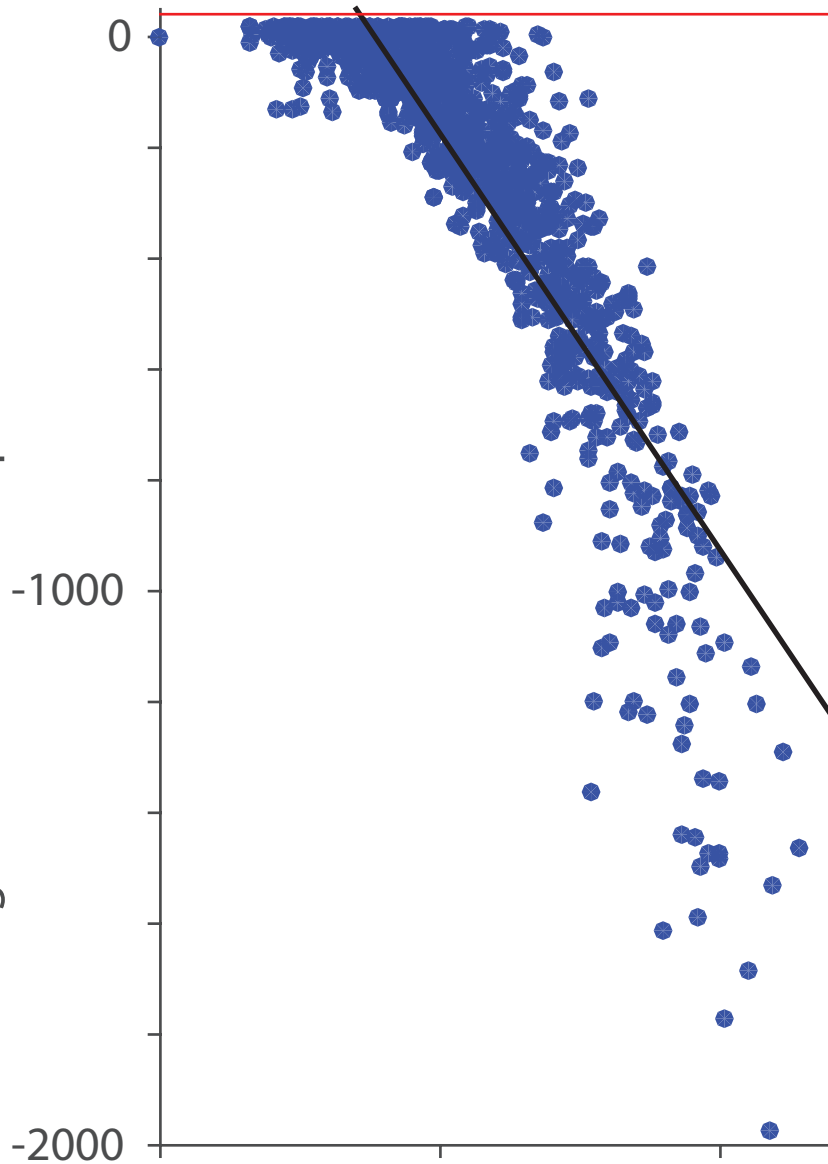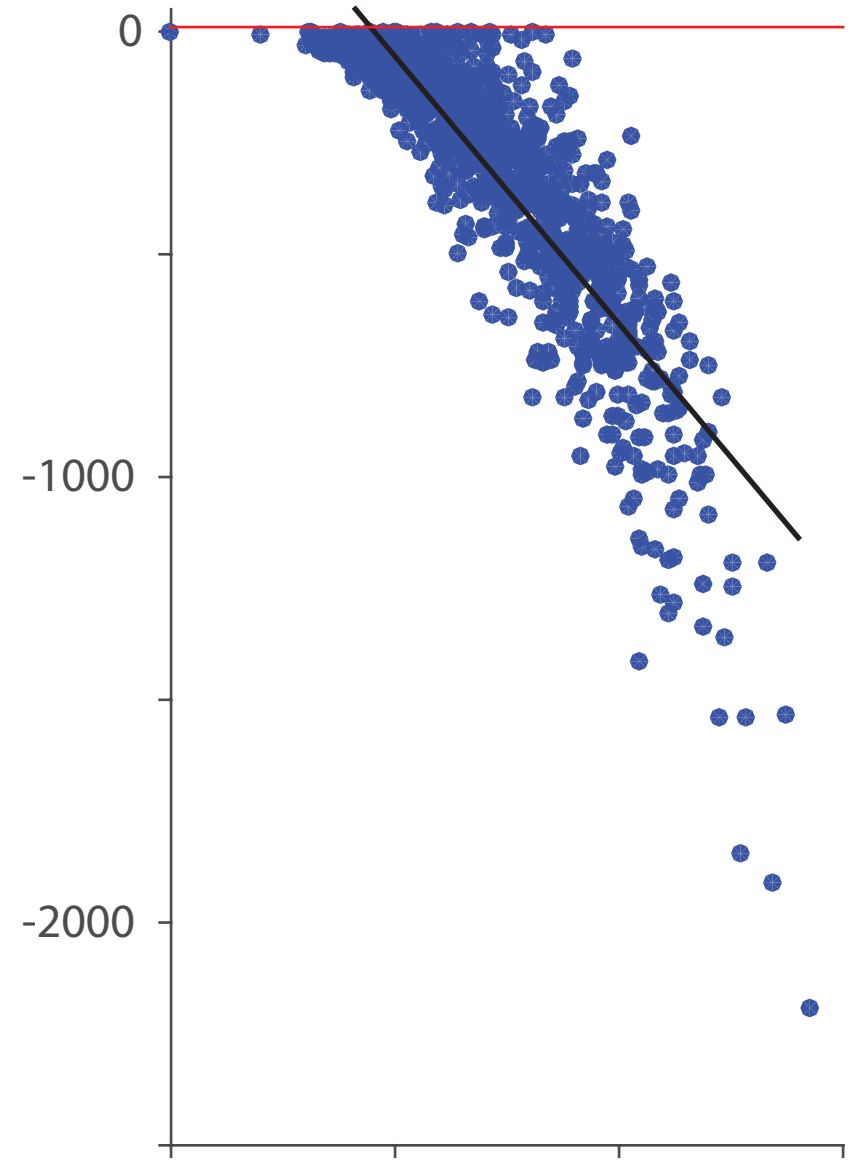

Mean perturbation (s)

Mean perturbation (s)

# Fig. S2

Monkey N (28 Sessions)

Monkey B (21 Sessions)

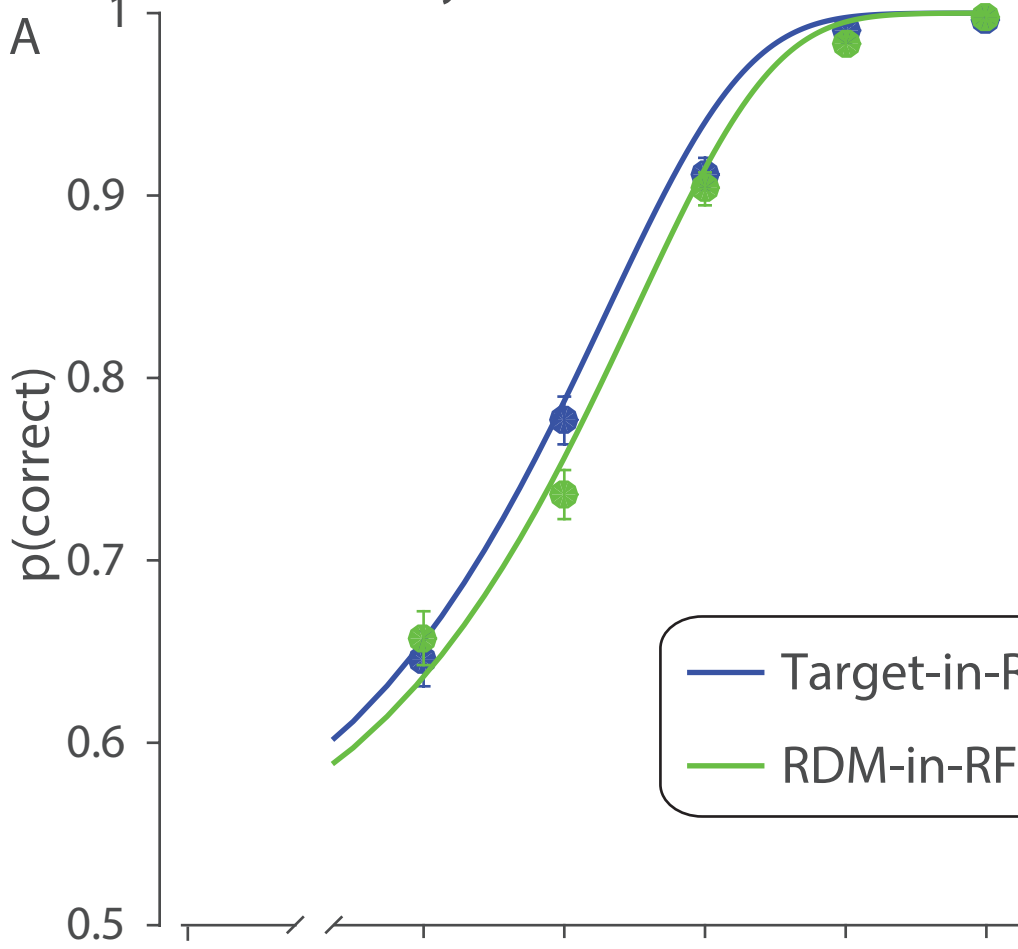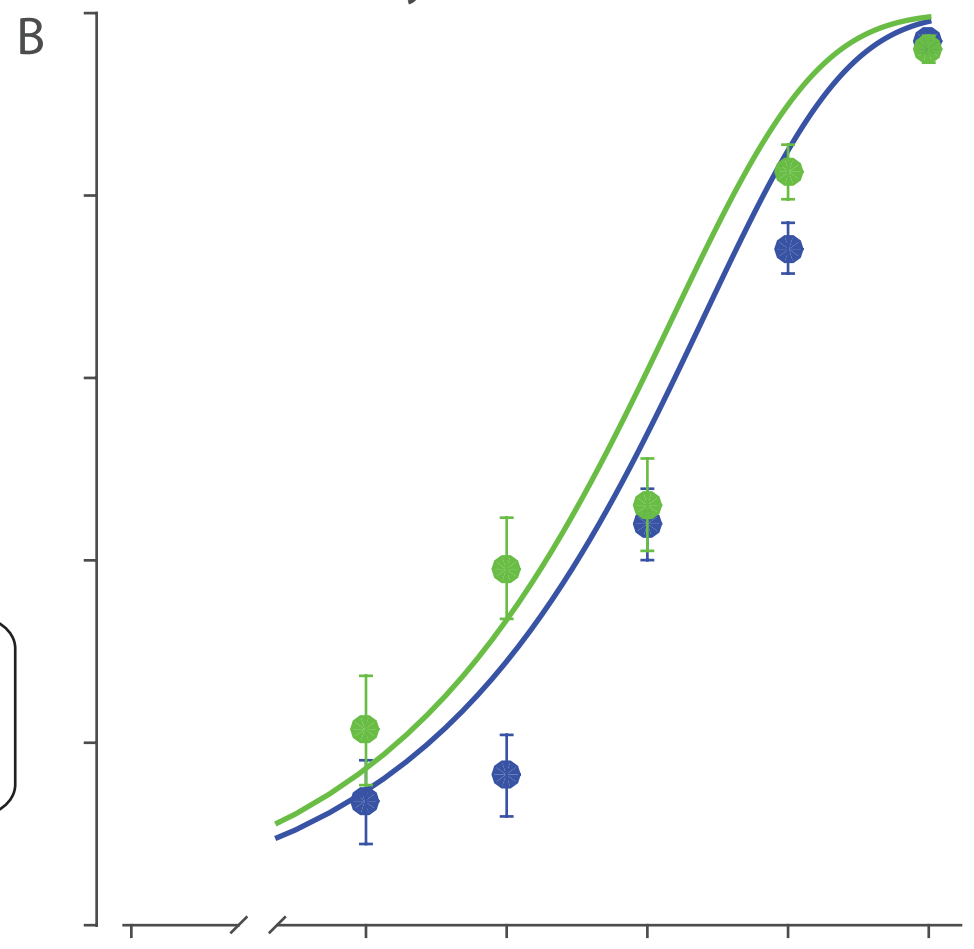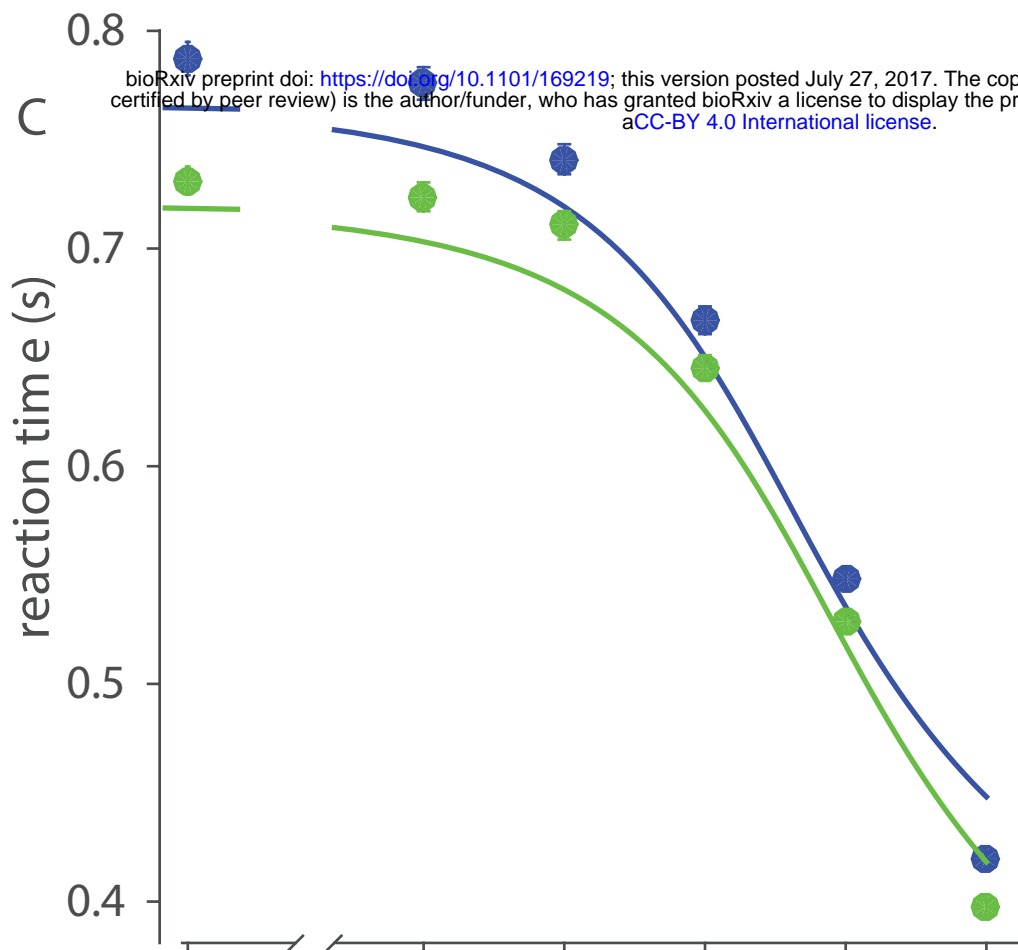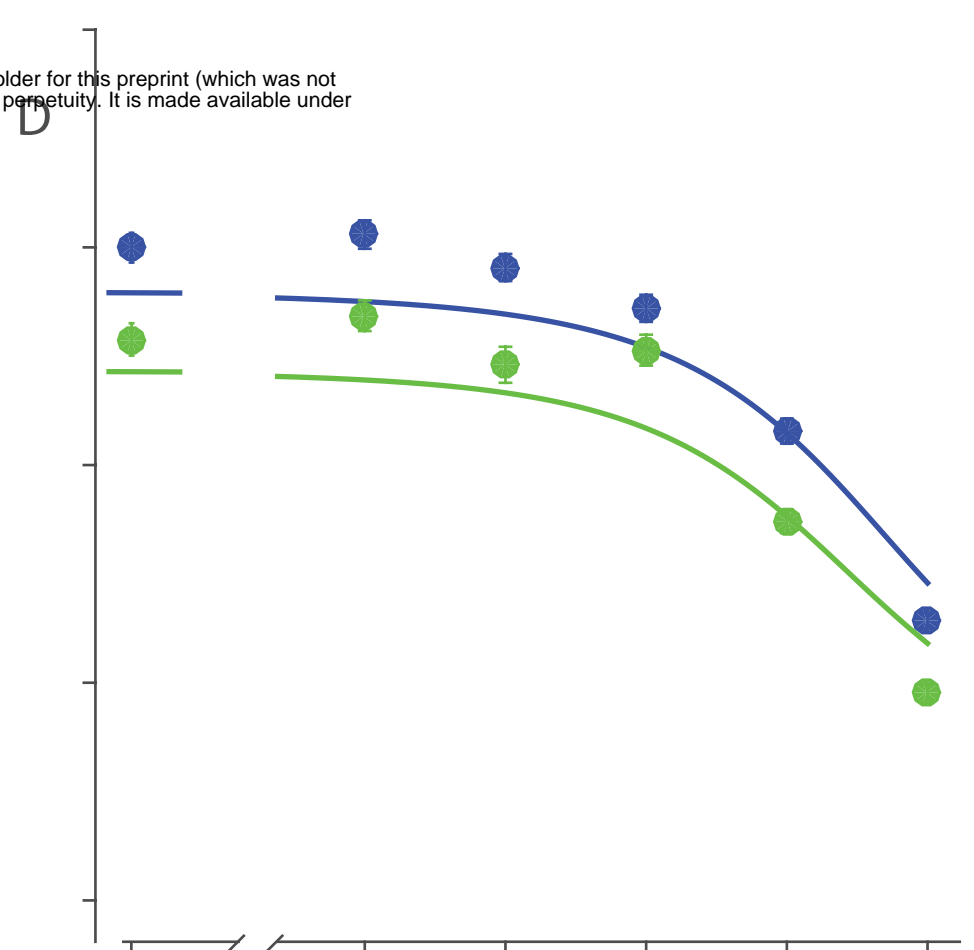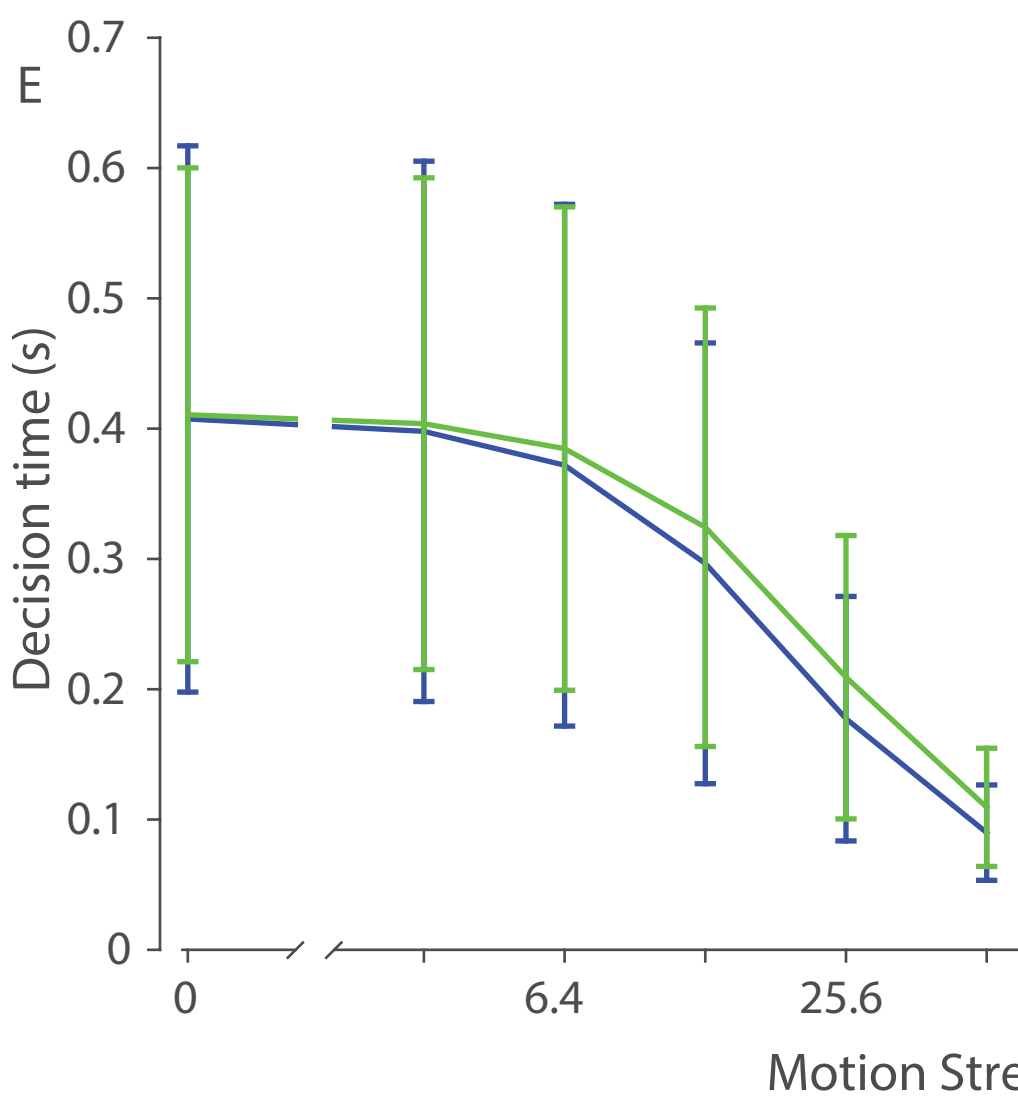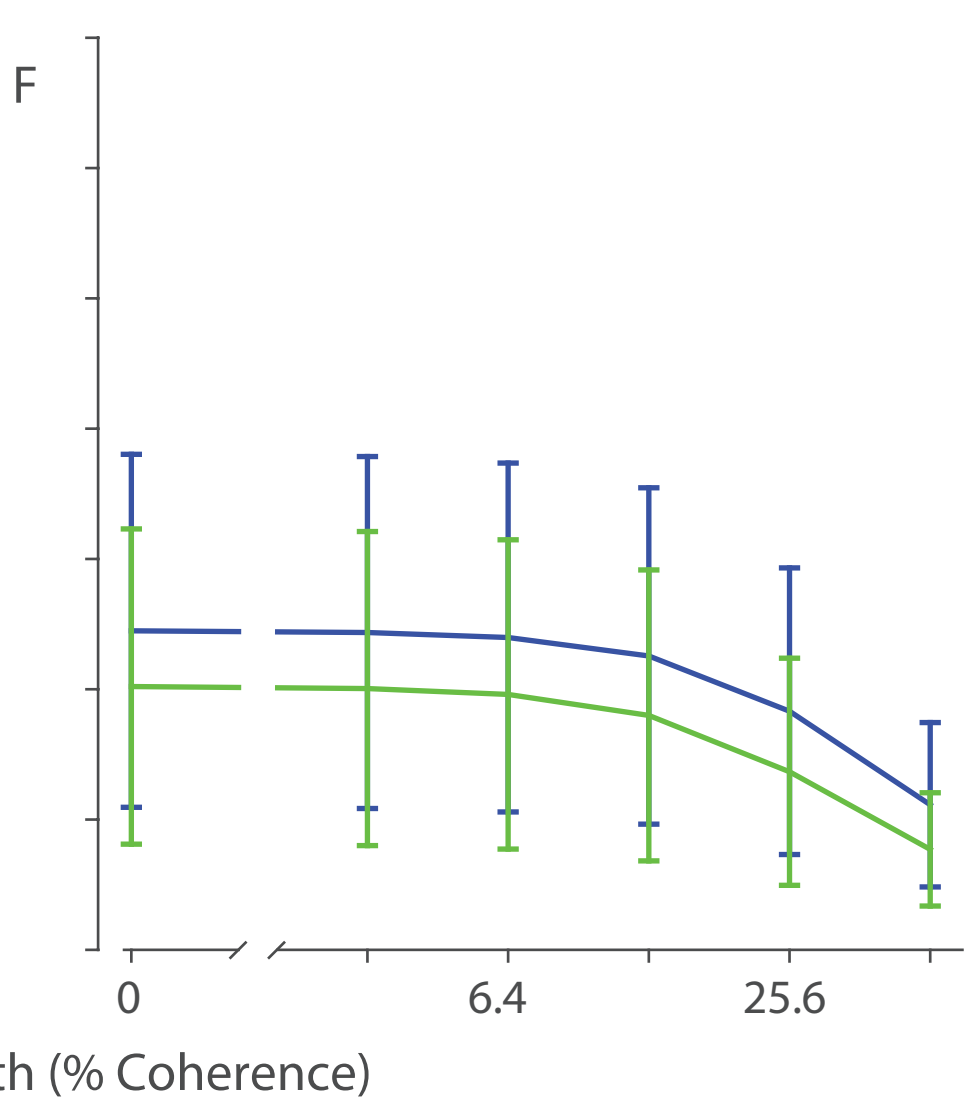

MONKEY N

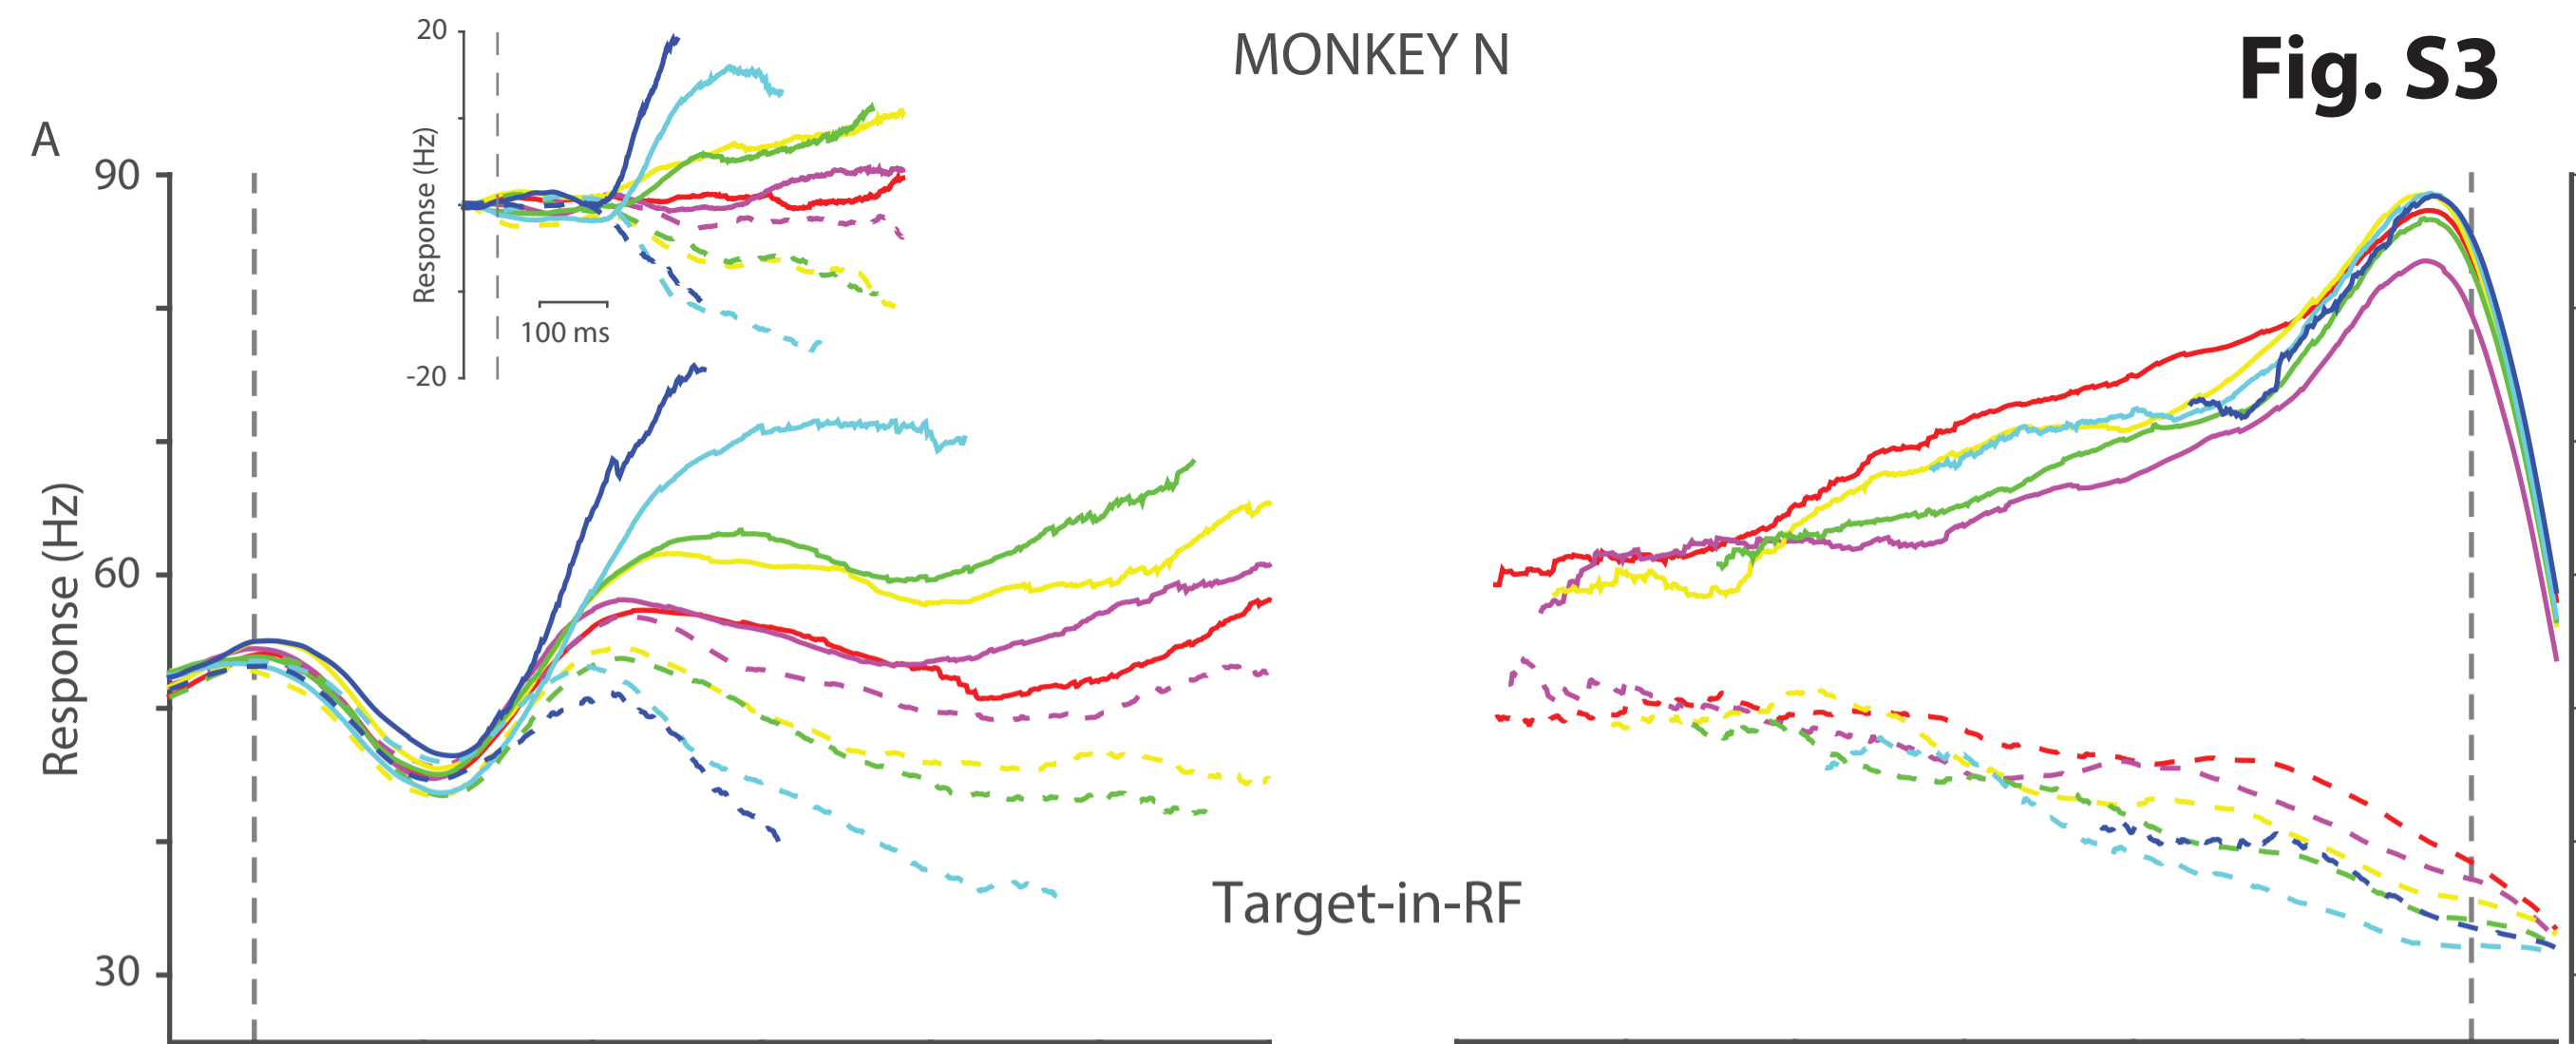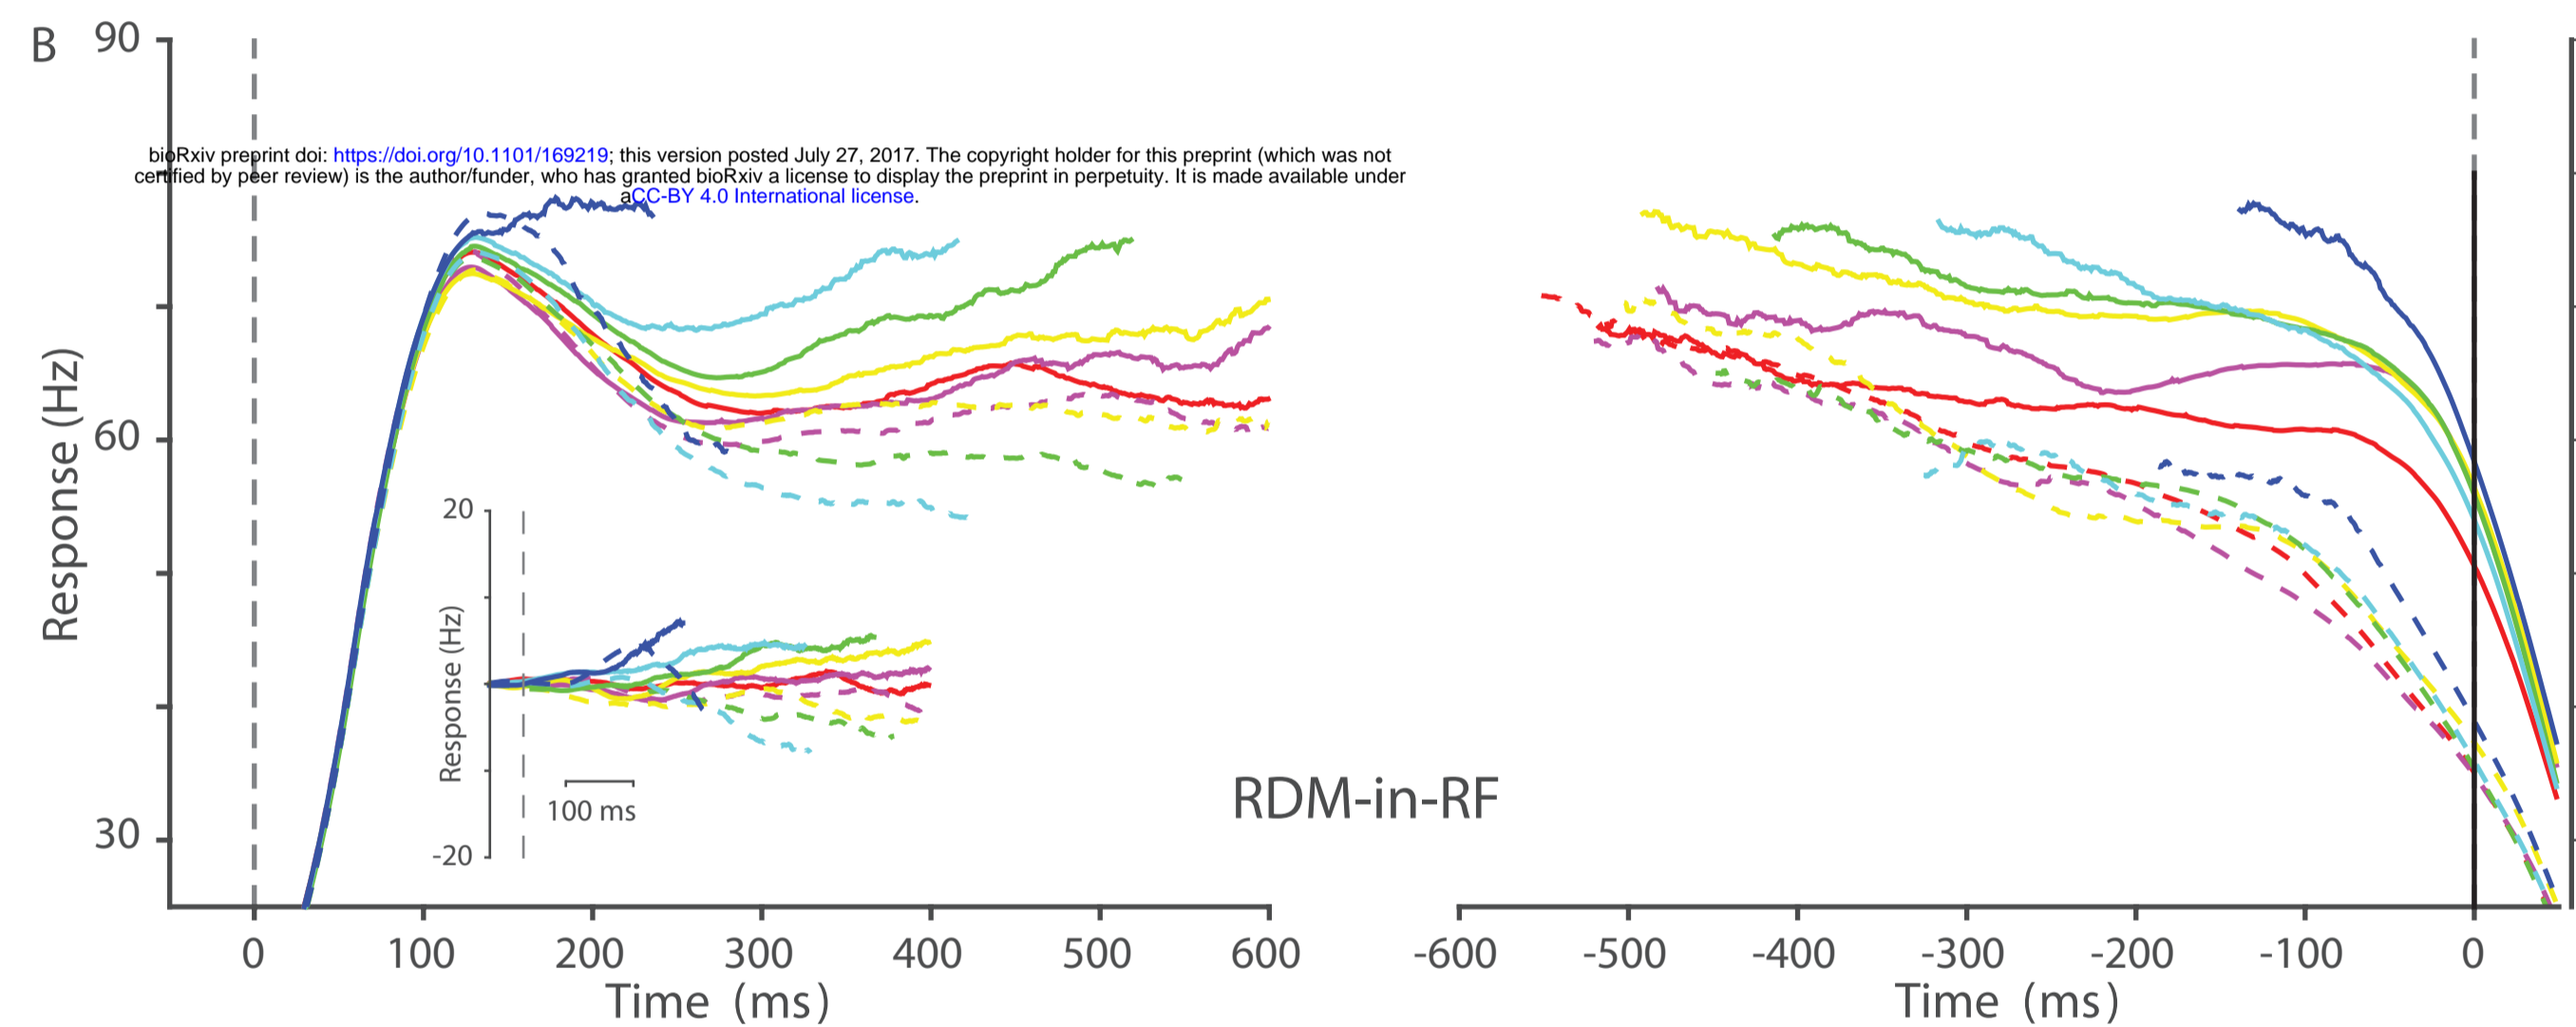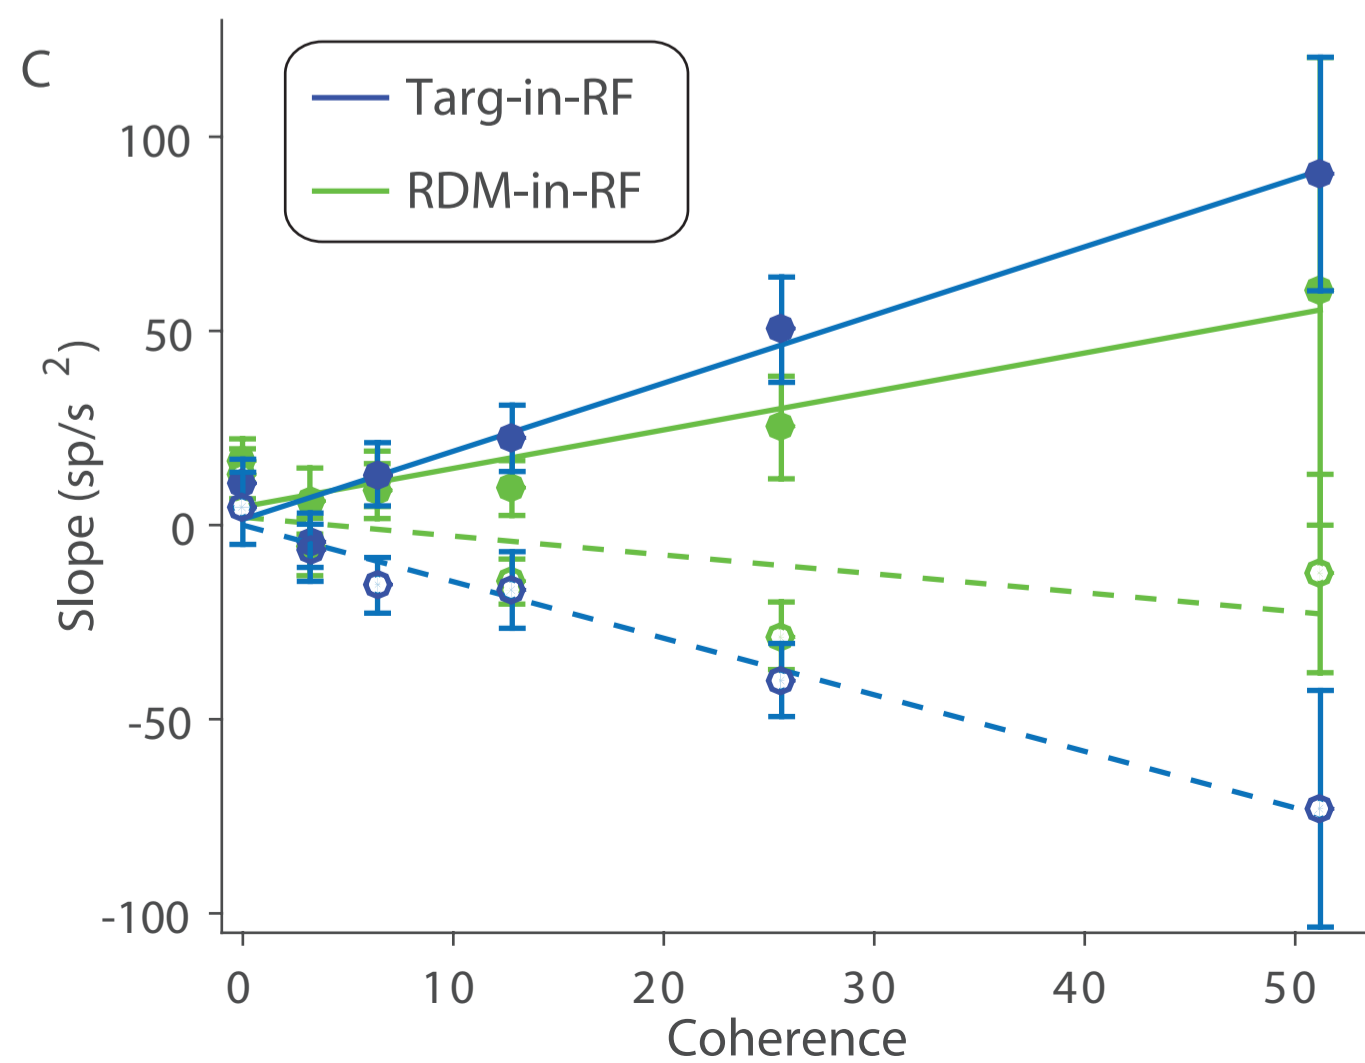

MONKEY B

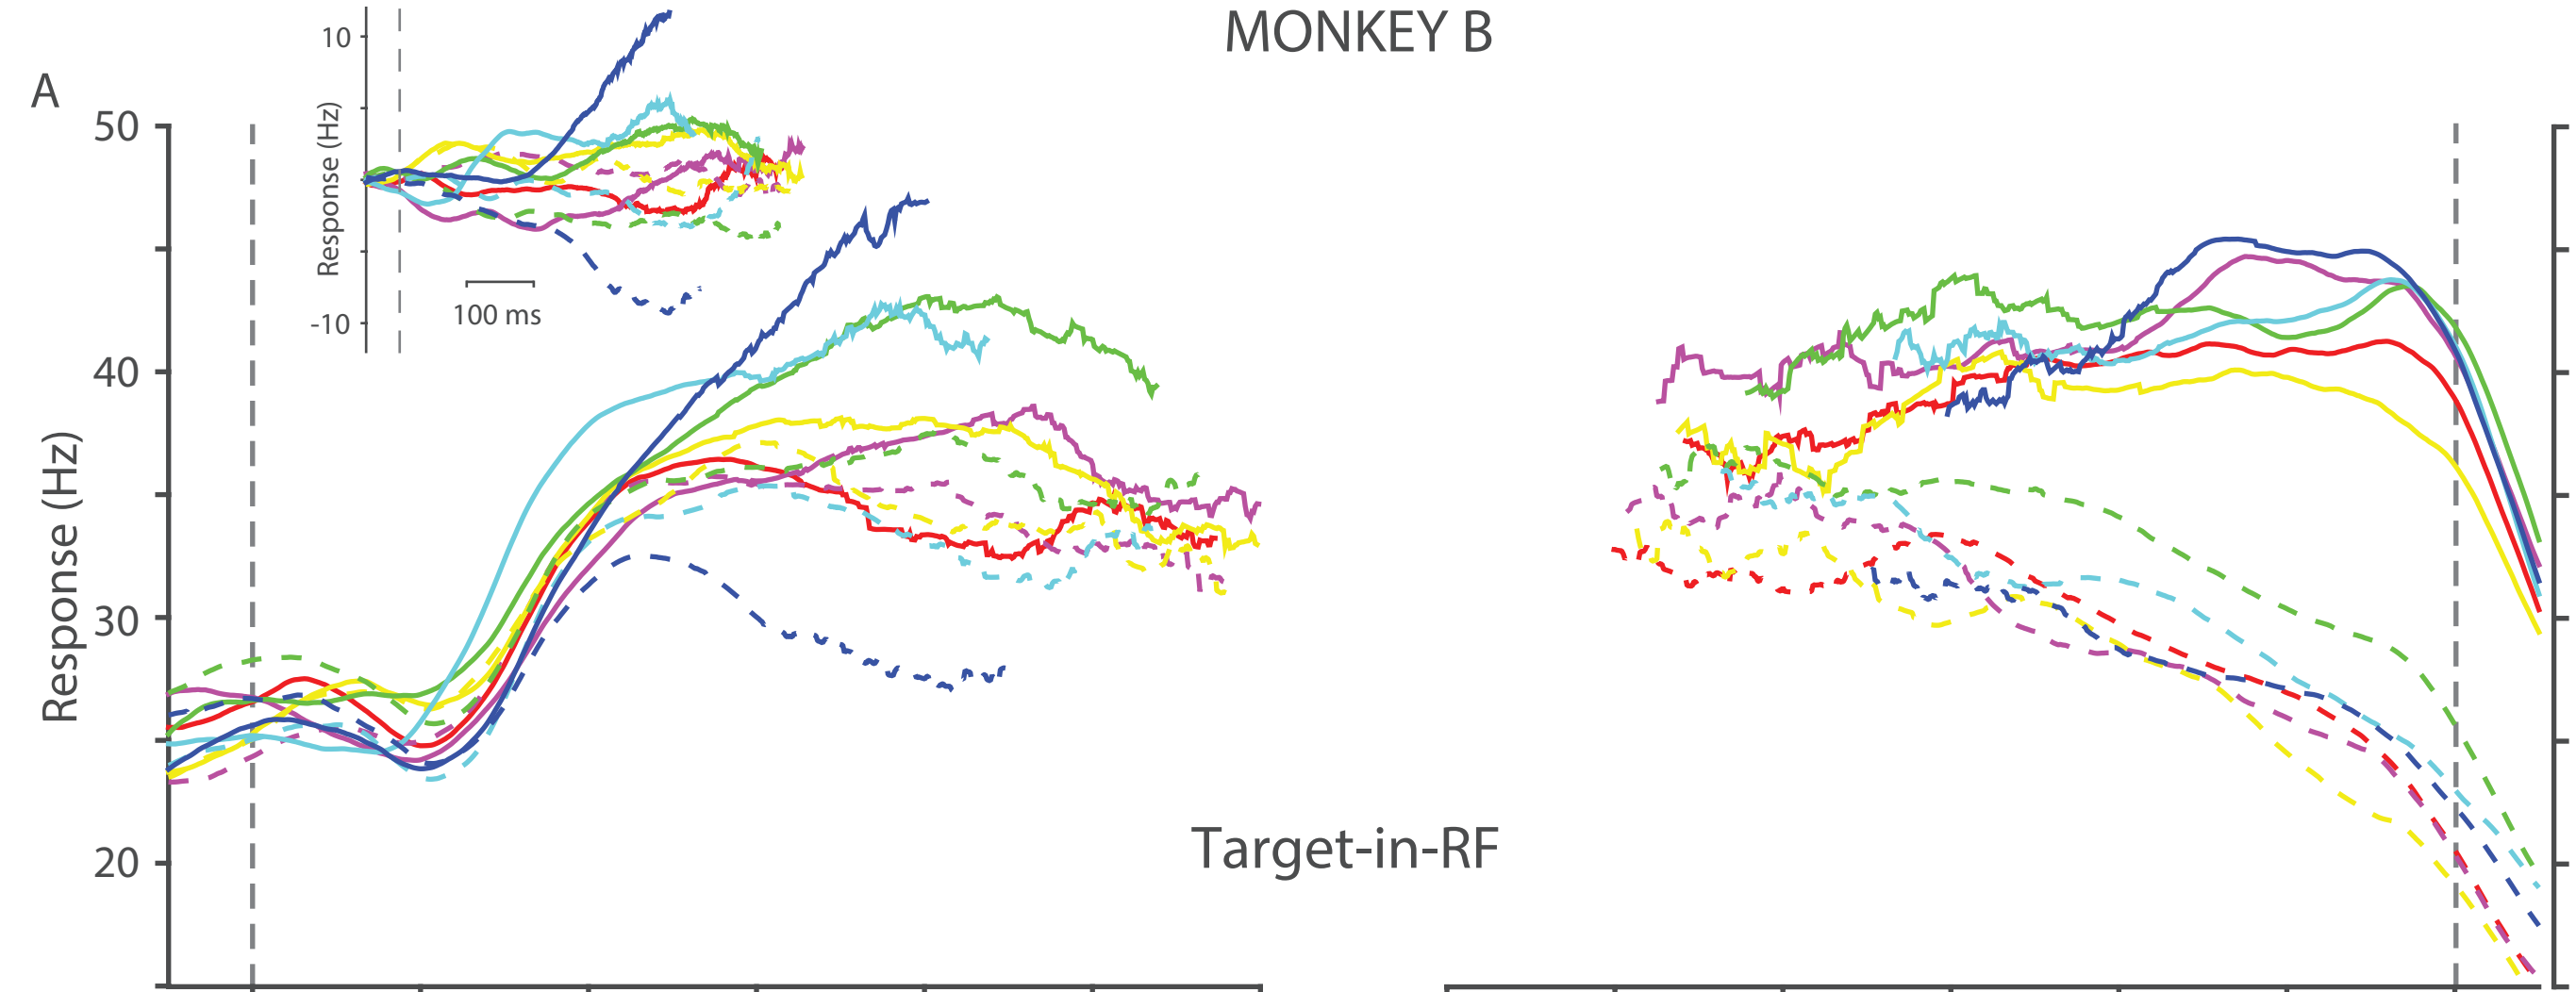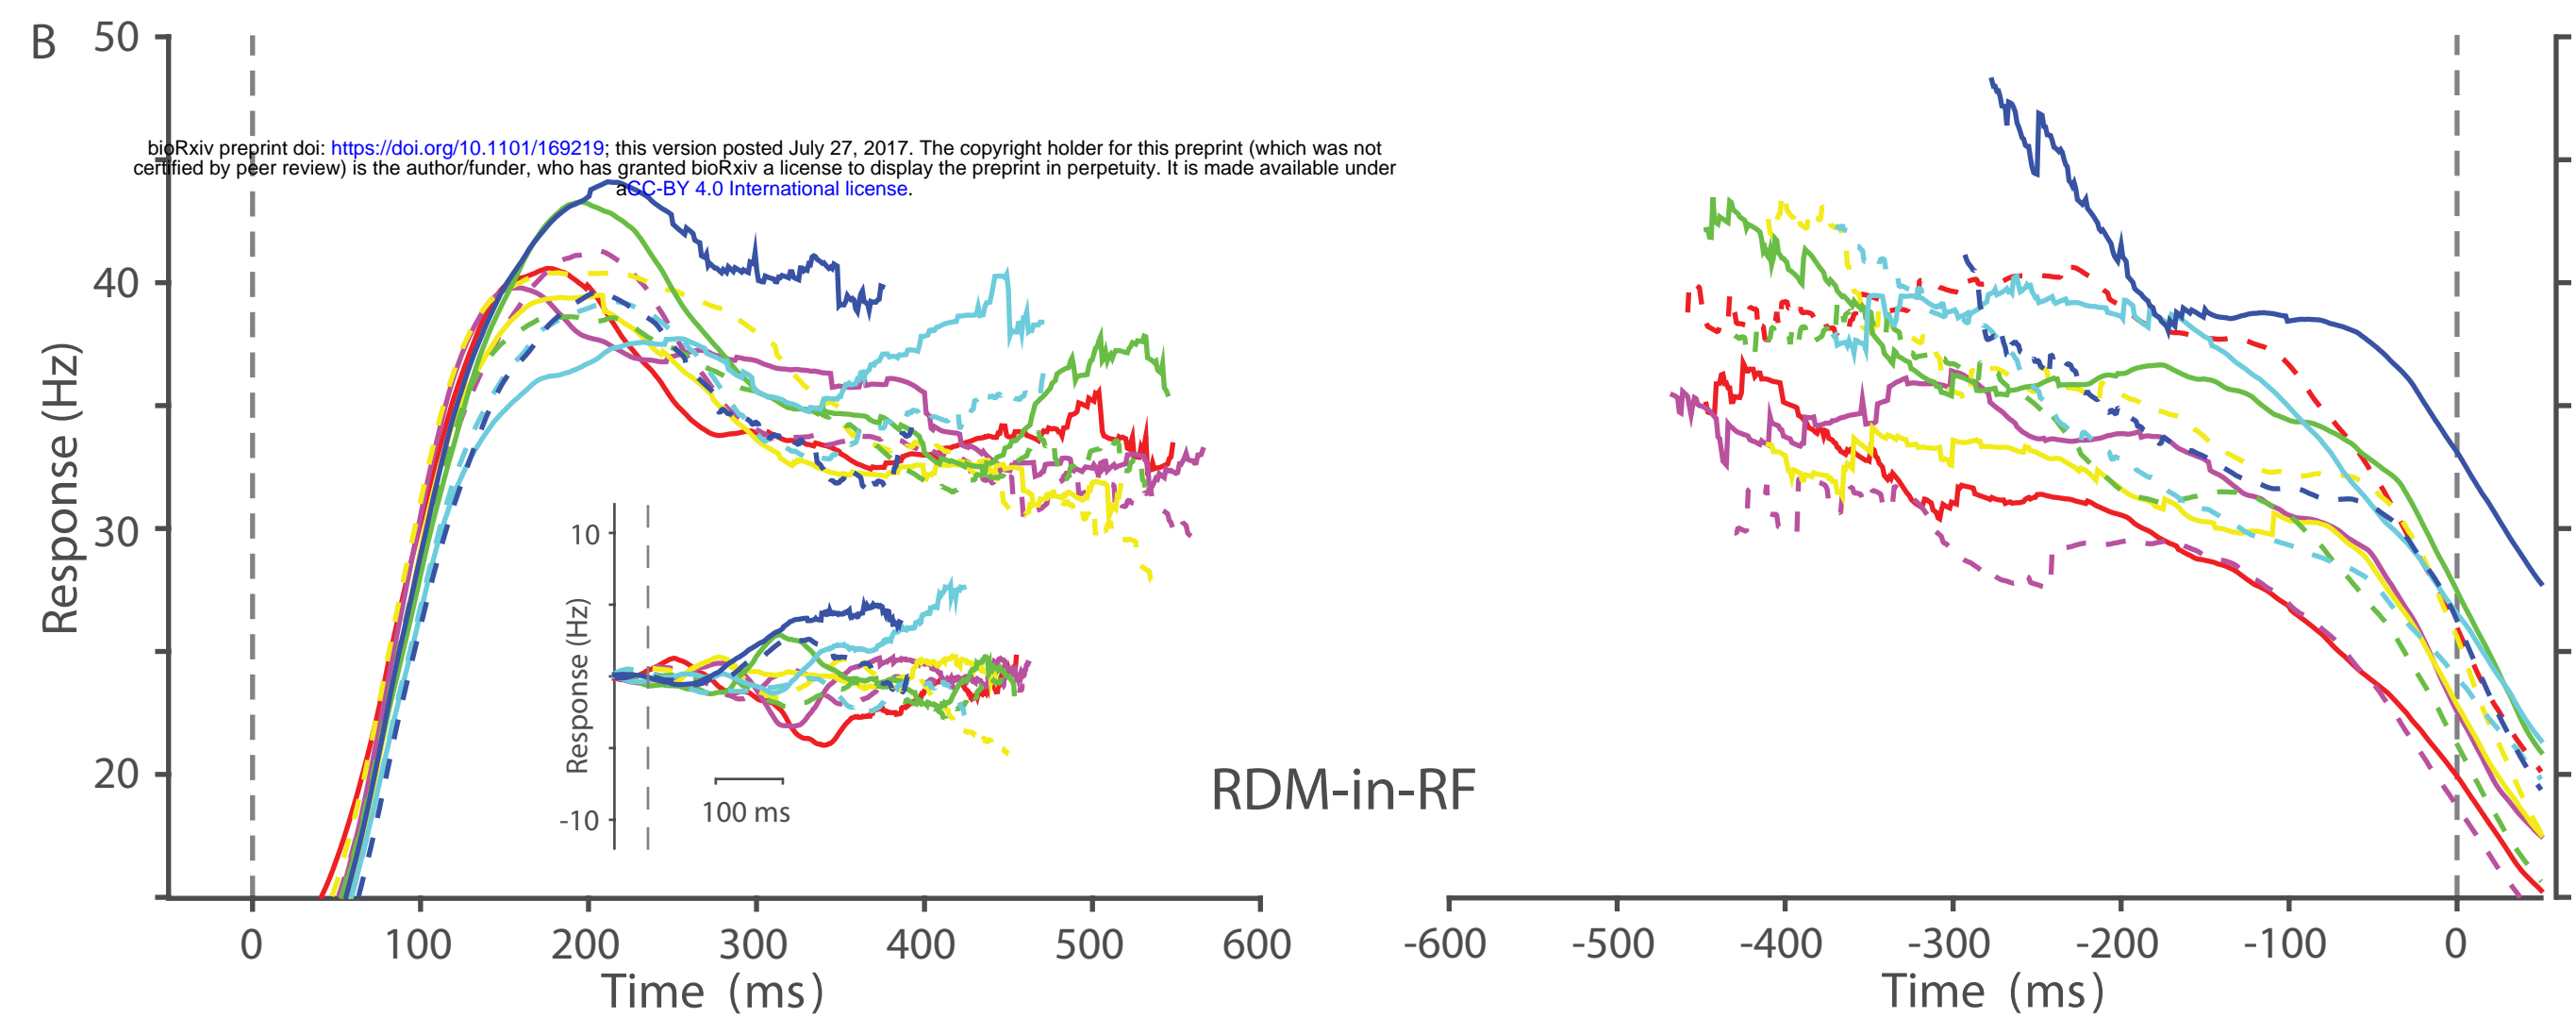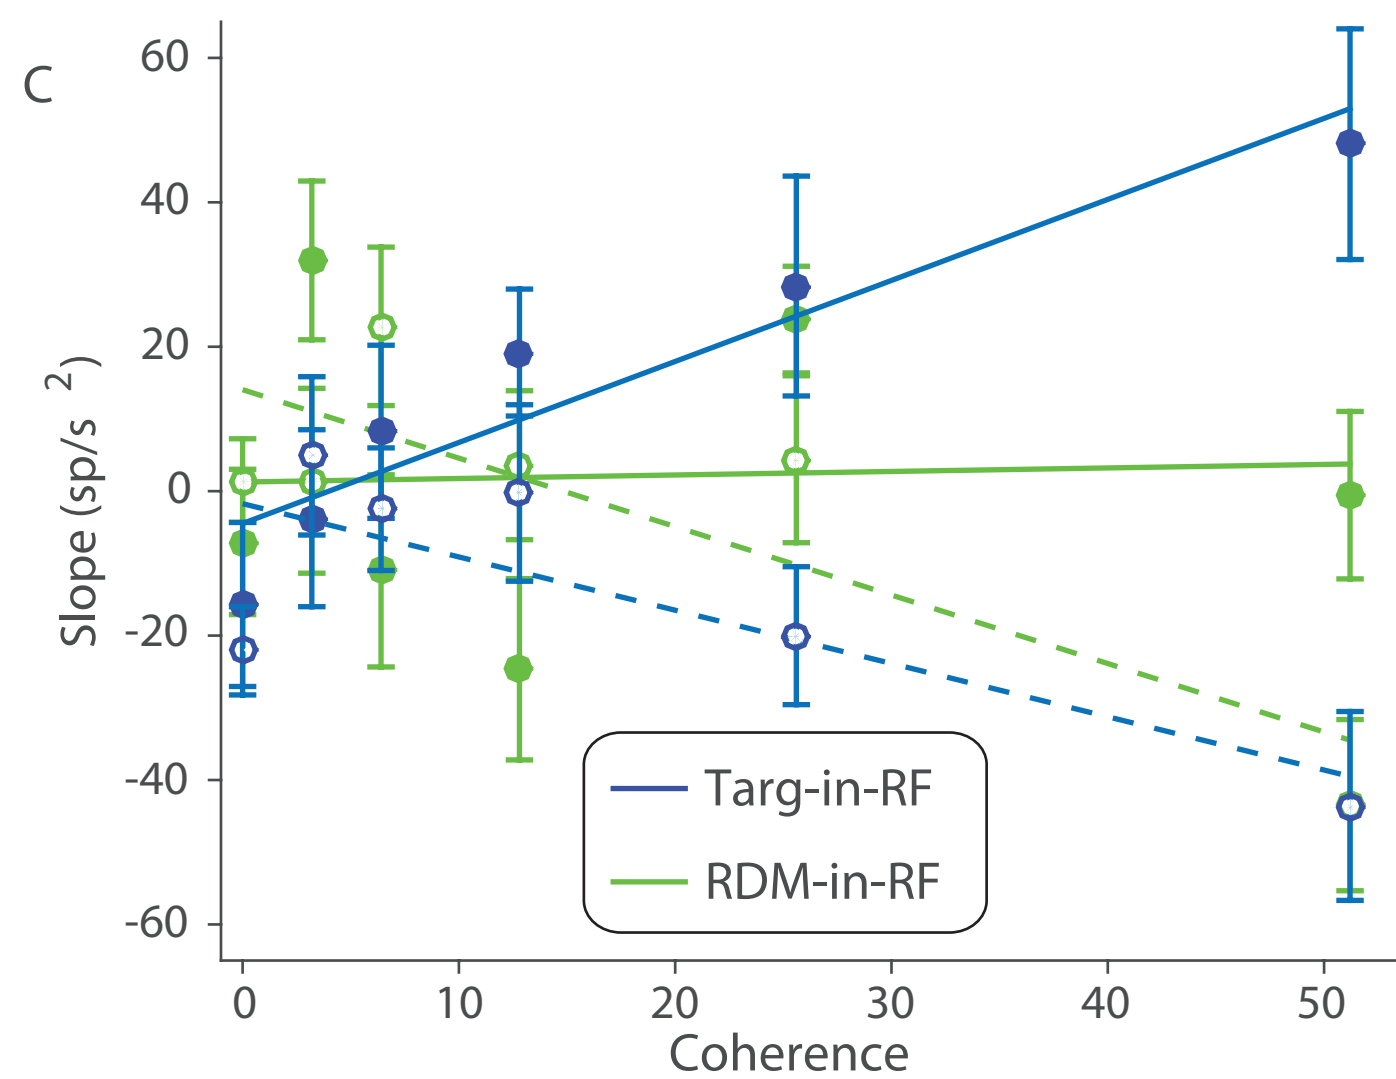

**Fig. S4**
